# Supplementary material for: The 2015 Clinical Guidelines for the Diagnosis and Treatment of HIV/AIDS in HIV-Infected Koreans
Source: PubMed Central journal article supplement — Infect Chemother. 2015 Sep 30;47(3):205–11. doi: 10.3947/ic.2015.47.3.205 (PMC4607777; doi:10.3947/ic.2015.47.3.205), 2015-09-30
Supplement: ic-47-205-s001.pdf [file ic-47-205-s001.pdf]

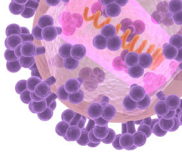

# 국내 HIV 감염인의 HIV/AIDS 진단 및 치료에 관한 임상진료지침 권고안: 2015년 개정판

대한에이즈학회

The Committee for Clinical Guidelines for the Diagnosis and Treatment of HIV/AIDS of the Korean Society for AIDS was founded in 2010. The first edition of the Korean guidelines was published in 2011, and revised in 2013. The recommendations in the guideline contain important information for physicians working with HIV/AIDS in the clinical field. However, due to the rapid discovery of new data in the field of HIV and the evolution of the clinical environment in Korea, it has become necessary to revise the guideline again. This guideline aims to provide up-to-date comprehensive information regarding the diagnosis and management of HIV/AIDS in Korea. This guideline deals with issues regarding the initial assessment of newly diagnosed patients, timing of antiretroviral treatment (ART) initiation, preferred ART regimens in treatment-naïve as well as treatment-experienced patients and special populations such as HBV/HCV co-infected patients, or pregnant women. A brief summary of the revised guidelines and key changes to the original version of the guidelines are summarized below.

**Key Words:** HIV/AIDS; Diagnosis; Antiretroviral treatment; Guidelines

## 머리말

### 1. 배경 및 목적

에이즈는 1981년 미국 질병통제예방센터(Centers for Disease Control and Prevention, CDC)가 동성애자 집단에서 폐포자충 폐렴이나 카포시 육종과 같은 질환이 현저하게 많이 발생한다는 사실을 보고하면서 세상에 알려지기 시작했다. 사람면역결핍바이러스에 감염되면 인체의 면역기능 중 세포성 면역에 관계되는 CD4+ T 세포가

주로 파괴된다. 에이즈는 사람면역결핍바이러스에 감염된 후 세포성 면역기능 등 인체의 면역력이 떨어지면서 건강한 사람에서는 잘 나타나지 않는 바이러스, 세균, 곰팡이 및 기생충 등에 의한 각종 감염성 질환이나 악성 종양 등 여러 합병증이 발생하는 상황으로 총체적으로 의미한다. 사람면역결핍바이러스 감염병기에 따라서 임상 경과에는 차이가 있으며, 적절한 초기평가, 추적관찰 주기 및 치료 등에 대한 진료지침 마련이 필요하다.

본 연구의 목적은 2013년 대한에이즈학회에서 발표한 국내 사람면

\* 대한에이즈학회 HIV/AIDS 진단 및 치료 임상진료지침 제정위원회

위원장: 위성현(가톨릭대학교 성빈센트병원 감염내과)

위 원: 김남중(서울대학교 서울대학교병원 감염내과), 방지환(서울대학교 서울시립보라매병원 감염내과),

김낙현(서울대학교 서울대학교병원 감염내과), 최준용(연세대학교 세브란스병원 감염내과), 신형식(국립중앙의료원 감염내과),

신소연(가톨릭관동대학교 국제성모병원 감염내과), 송준영(고려대학교 구로병원 감염내과)

\* 본 권고안은 2014년 11월 현재 국내 실정에 적합한 HIV 감염인의 HIV/AIDS 진단 및 치료에 대한 기본적인 원칙을 제시하는 것으로서, 모든 환자에 대해서 본 진료지침을 일률적으로 적용하는 것보다는 기본적으로 참고하되 각 환자의 여러 임상 상황들을 고려한 의사의 최종적인 판단에 의한 진료에 중요하다.

\* 본 권고안은 개인적인 진료 및 교육 목적으로 활용될 수 있지만 상업적인 목적이나 진료 심사 목적 등으로 사용될 수 없으며, 어떠한 형태로든 다른 목적으로 사용하고자 하는 경우에는 제정위원회에 서면 요구서를 제출하여 서면 동의를 얻어야 함.

Received: June 30, 2015

**Corresponding Author :** The Committee for Clinical Guidelines for the Diagnosis and Treatment of HIV/AIDS of the Korean Society for AIDS. The Korean Society for AIDS, 309 Gangnam-daero, Seocho-gu, Korea Business Center Room 512, Seoul 06628, Korea  
Tel: +82-2-3487-1755, Fax: +82-2-585-8384, E-mail: kosa@kosids.or.kr

역결핍바이러스 감염인의 HIV/AIDS 진단 및 치료에 관한 임상진료 지침 권고안을 최근 실정에 맞도록 개정하는 것이다. 국내에 여러 항레트로바이러스 약제들이 새로 도입되었고 HIV 영역에서 새로운 연구 결과들이 많이 발표되면서 권고안의 개정이 필요하게 되었다.

## 2. 범위

본 진료지침에서는 2014년 11월 현재 국내 실정을 고려하여 사람면역결핍바이러스 감염인의 진단과 치료에 필요한 초기 검사실 평가와 추적검사 주기, 항레트로바이러스제 치료 시작 시기, 초치료와 치료 경험자에서의 항레트로바이러스제 치료제 선택, 사람면역결핍바이러스와 B형/C형 간염바이러스(HBV/HCV) 동시 감염 환자의 치료, 그리고 임신부의 항레트로바이러스 치료에 대한 권고안을 제시하고자 한다. 사람면역결핍바이러스 감염인에서 발생하는 기회감염에 대한 치료와 예방 및 예방접종 권고안은 별도의 임상진료지침이 있어 본 지침의 범위에 해당되지 않는다.

## 3. 임상진료지침 위원회 구성

2012년 4월 대한에이즈학회에서 국내 사람면역결핍바이러스 감염인에서의 HIV/AIDS의 진단 및 치료에 대한 임상진료지침 권고안을 개정하기 위한 임상진료지침 위원회를 처음으로 구성하였다. 2014년 임상진료지침 개정을 위해 위원회를 재구성하였으며 2012년 4월과 비교하였을 때 일부 위원이 교체되었다.

## 4. 문헌검색방법

본 임상진료지침 제정을 위한 체계적인 문헌검색 기간은 1995년 1월부터 2014년 10월까지로 설정하였다. 국외에서 출판된 문헌 검색은 PubMed ([www.pubmed.gov](http://www.pubmed.gov))를 이용하였으며, 국내 문헌 검색은 KoreaMed (<http://www.koreamed.org>)와 한국학술정보(<http://kiss.kstudy.com>)를 사용하였다. 또한, 사람면역결핍바이러스/에이즈와 관련된 주요 학술 행사(International AIDS Society Conference, International AIDS Conference, Conference on Retroviruses and Opportunistic Infections 등)의 초록집도 함께 검색하였다. 본 임상진료지침 권고 개정안에서는 총 332개의 참고문헌을 인용하였다.

## 5. 핵심질문(Key Question) 설정 및 합의 도출 과정

국내 사람면역결핍바이러스 감염인에서 HIV/AIDS 진단 및 치료에 대한 임상진료지침을 마련하기 위하여 초기 평가와 추적 검사, 고

강도 항레트로바이러스요법(highly active antiretroviral therapy, HAART) 시작 시기, 치료경험이 없는 환자에서의 고강도 항레트로바이러스요법, 치료경험이 있는 환자에서 고강도 항레트로바이러스요법, HIV/HBV 및 HIV/HCV 동시 감염 환자의 치료, 임신부의 항레트로바이러스 치료로 분야를 나누었으며, 주요 내성검사의 해석은 부록으로 기술하였다. 핵심질문은 관련 문헌, 국외 진료지침, 현재 국내에서 이용 가능한 검사 및 항레트로바이러스 치료 약제 등을 검토한 후에 실제 국내 임상 진료에서 만날 수 있는 다양한 상황들을 고려하여 선정하였다. 또한 임상진료지침 위원회에서 여러 차례의 회의를 시행하여 각 분야별 임상진료지침의 핵심질문을 최종적으로 선정하였다.

## 6. 권고의 강도 및 근거 수준(Table 1)

본 권고안에서 사용된 권장 강도와 근거 수준은 미국 DHHS (Department of Health and Human Services)의 최근 지침에서 사용하는 방법을 받아들여 표 1과 같이 권장 강도는 A, B, C 3가지로 분류하였고, 근거 등급은 I, II, III 3가지로 표시하였다(Table 1).

### 1) 권고의 강도

- ① A - 권장할 만한 충분한 근거가 있다.
- ② B - 충분한 근거가 있는 것은 아니지만 고려할 정도의 근거는 있다.
- ③ C - 권장하기에 근거가 불충분하다.

### 2) 근거 수준

- ① I - 하나 이상의 무작위 대조연구의 근거가 있음
- ② II - 무작위 연구는 아니지만 잘 고안된 임상연구를 통한 근거가 있음
- ③ III - 임상 경험이나 위원회 보고서를 기초로 한 권위자들의 견해

## 7. 외부 전문가 평가

연구자들 간에 내부 회의를 통하여 마련된 진료 지침 개정안을 2014년 11월 21일에 개최된 제 8회 대한에이즈학회 학술대회에서 발표하였으며, 전문가군의 평가의견을 수렴하였고, 논의된 내용을 추가적인 임상진료지침 위원회의 내부 회의를 통하여 수정, 보완하였다. 기타 전문가 그룹의 의견을 수렴하고 이를 바탕으로 수정하여 진료지침을 완성하였다.

**Table 1.** Strength of recommendation and quality of evidence for recommendation

| Strength of recommendation                   | Quality of evidence for recommendation                                                                               |
|----------------------------------------------|----------------------------------------------------------------------------------------------------------------------|
| A: Strong recommendation for the statement   | I: One or more randomized trials with clinical outcomes and/or validated laboratory endpoints                        |
| B: Moderate recommendation for the statement | II: One or more well-designed, nonrandomized trials or observational cohort studies with long-term clinical outcomes |
| C: Optional recommendation for the statement | III: Expert opinion                                                                                                  |

## 8. 용어 및 약어 정리

본 임상진료지침에서는 의학용어집 제 5판(대한의사협회 발행, 2008년 11월 개정)을 기준으로 관련된 학술 용어들을 한글로 표기하였으며, 한글로의 의미 전달이 명확하지 않을 경우 한글로 표시한 후 괄호 내에 영문 표기를 병기하였다. 고유명사, 약품명, 단위 등과 같이 한글로 표시할 수 없는 용어들은 영문으로 표기하였다.

고강도 항레트로바이러스요법을 시행한 적이 없는 환자들을 치료 경험이 없는 환자(treatment-naive patient)로 표기하고, 과거에 고강도 항레트로바이러스요법을 시행한 적이 있는 환자들을 치료 경험이 있는 환자(treatment-experienced patient)로 표기하였다.

본 임상진료지침 권고안에서 사용된 약어들은 다음과 같다.

ABC, abacavir; ATV, atazanavir; d4T, stavudine; ddI, didanosine; DRV, darunavir; EFV, efavirenz; FTC, emtricitabine; HBV, hepatitis B virus; HCV, hepatitis C virus; LPV, Lopinavir; MVC, maraviroc; NFV, nelfinavir; NVP, nevirapine; PI/r, protease inhibitors boosted with ritonavir; RAL, raltegravir; RPV, rtipivirine; RTV, ritonavir; SQV, saquinavir; TDF, tenofovir; TPV, tipranavir; ZDV, zidovudine; 3TC, lamivudine.

## 항목별 임상진료지침

### 1. 초기평가 및 추적검사

#### 1) 서론

##### (1) 배경 및 범위

사람면역결핍바이러스 감염인은 다양한 의학적, 심리적, 사회적 문제와 만나게 된다. 사람면역결핍바이러스 감염인이 처음 의료가 관에 내원하는 경우 환자의 증상, 기저질환, 경제적 요소, 고위험 행위, 심리적 요소 등에 대한 충분한 문진과 실험실적 검사를 통한 기초 평가가 수행되어야 하며, 이와 같은 적극적인 진료와 상담은 환자가 질병을 이해하고 적응하는데 기여할 것이다. 본 진료지침에서는 기존의 외국 진료지침과 국내 발표 자료를 근거로 사람면역결핍바이러스 감염인에서 초기 평가와 주기적인 추적 조사를 위해 시행하는 검사들에 대해서 다루고자 한다[1-4].

##### (2) 문헌 검색

본 분야의 진료 지침 작성을 위하여 미국 DHHS panel, European AIDS Clinical Society (EACS), IAS-USA panel 등의 지침을 검토하였으며, PubMed (www.pubmed.gov) 검색 엔진을 사용하여 1995년 1월부터 2014년 11월까지의 기간 동안 국외에서 출판된 문헌들을 검색하였다. 국내문헌은 동일한 기간 동안 KoreaMed (http://www.koreamed.org)와 한국학술정보(http://kiss.kstudy.com)를 사용하여 검색하였다.

사람면역결핍바이러스에 대한 검색어로 ‘HIV’ 또는 ‘Human

immunodeficiency virus’, 진단 및 추적 검사에 대한 검색어로 ‘Diagnosis’, ‘Screening’, ‘Monitoring’, ‘Laboratory’, ‘Assay’ 또는 ‘Assessment’, 기타 관련 검색어로 ‘Drug resistance’, ‘Hypersensitivity reaction’ 등을 선택, 조합하여 검색하였다.

#### (3) 핵심질문요약

- 사람면역결핍바이러스 감염인이 초기 방문하였을 때 시행해야 할 실험실 검사와 영상학적 검사는?
- 고강도 항레트로바이러스요법이 필요하다고 판단된 환자에서 항레트로바이러스 약제를 투여하기 전에 확인해야 하는 실험실 검사는?
- 고강도 항레트로바이러스요법을 받고 있는 사람면역결핍바이러스 감염인에서 약제 독성이나 기회감염과 관련된 실험실 검사의 시행 주기는?
- 초기 평가 후에 고강도 항레트로바이러스요법을 하지 않고 관찰 중인 사람면역결핍바이러스 감염인에서 질병진행상태 및 기회감염과 관련된 실험실 검사의 시행 주기는?
- 항레트로바이러스제 약제내성검사는 언제 시행해야 하는가?

#### 2) 사람면역결핍바이러스 감염인이 초기 방문하였을 때 시행해야 할 실험실 검사와 영상학적 검사는?

감염인의 사람면역결핍바이러스 질병단계, 주요 장기의 기능 상태, 기저질환, 기회감염 등을 파악하기 위하여 다음과 같은 검사들을 실시해야 한다(Table 2).

1. CD4+ T 세포수와 백분율, 혈장 HIV RNA 정량검사를 시행한다 (A-I). 치료를 요하는 기회감염에 감염된 사람면역결핍바이러스 감염인은 급성기 치료 후 안정화되면 CD4+ T 세포수, 혈장 HIV RNA 정량검사를 반복한다(A-II).
2. 백혈구 백분율(differential count)을 포함한 일반혈액검사(complete blood count, CBC)와 혈당, 지질, 간기능, 신장기능, 칼슘, 인 등을 포함한 일반화학검사를 시행한다(A-III).
3. A형 간염(B-III), B형 간염(A-III), C형 간염(A-III)에 대한 혈청학적 선별검사를 실시한다.
4. 매독(A-II)과 독소포자충(B-III)에 대한 선별검사를 한다.
5. 결핵을 선별하기 위해 결핵피부반응검사(tuberculin skin test, TST) 또는 interferon (IFN)- $\gamma$  release assay를 시행하거나(A-I), 흉부방사선 검사를 실시한다(A-III). 진행된 사람면역결핍바이러스 감염인에서는 TST가 음성이라도 CD4+ T 세포수가  $200/\text{mm}^3$  이상으로 회복된 후 재검을 권장한다(A-III).
6. 임질, 클라미디아 등 기타 성매개 질환에 대한 선별검사를 고려한다(B-II).
7. 초기 내원 시 사람면역결핍바이러스 감염인에 대해 유전형 약제내성검사(genotypic test)를 시행해 전파내성을 평가해야 한다(A-III).

**Table 2.** Initial assessment in HIV-infected subjects

|                                                             |                                                           |
|-------------------------------------------------------------|-----------------------------------------------------------|
| HIV antibody test                                           | Chest X-ray                                               |
| CD4+T-cell count, plasma HIV RNA (viral load)               | Serologic tests for hepatitis A, B and C viruses          |
| Genotypic resistance test                                   | Toxoplasma antibody, Pap smear                            |
| (in patients with HIV RNA level $\geq 1,000$ copies/mL)     | Screening test for syphilis (VDRL)                        |
| Complete blood count with differentials                     | Screening tests for other sexually transmitted diseases   |
| Basic chemistry, liver function test, fasting lipid profile | Tuberculin skin test (TST) or IFN- $\gamma$ release assay |

8. 50세 이상의 남성, 폐경기 여성, 골절 병력, 스테로이드 사용 기왕력 및 선성기능저하자에서는 골밀도 검사 시행을 고려한다(B-III).

**(1) 사람면역결핍바이러스 항체검사**

익명 검사 등으로 사람면역결핍바이러스 확진 검사 결과를 얻을 수 없는 경우나 혈장 HIV RNA가 검출되지 않는 수준의 환자는 사람면역결핍바이러스 항체검사를 시행해야 한다(A-III). 혈청학적 검사는 CD4+ T 세포수가 정상이고 혈장 HIV RNA는 검출되지 않는 무증상의 사람면역결핍바이러스 감염인에서 특히 중요하며, 검사결과지가 없이 내원하는 일부 환자에서도 이전 검사결과를 잘못 알고 있을 수 있으므로 재확인이 필요할 수 있다.

**(2) CD4+ T 세포수**

CD4+ T 세포수와 백분율에 대한 검사를 시행해야 한다(A-I). CD4+ T 세포수는 사람면역결핍바이러스 질병의 병기를 정하고, 사람면역결핍바이러스 감염으로 인한 합병증의 위험도를 평가하여 고강도 항레트로바이러스요법 및 기회감염 예방요법의 시행여부를 결정하는데 필요하다[4, 5]. 주로 절대적인 CD4+ T 세포수가 임상에서 활용되고 있지만, CD4+ T 세포 백분율 또한 면역상태를 평가하는데 이용되고 있으며 절대적인 림프구수에 비해 검사간 변이가 적은 장점이 있다. 일반적으로 CD4+ T 세포수 200-500개/mm<sup>3</sup>는 CD4+ T 세포 백분율 14-29%에 해당한다[1]. CD4+ T 세포수는 검사간 편차를 고려하여 가능하다면 초기 방문 시 1주일 간격으로 2회 측정되어야 한다(C-III).

**(3) 혈장 HIV RNA**

혈장 HIV RNA 정량검사를 시행해야 한다(A-I). 혈장 사람면역결핍바이러스 역가는 예후를 평가하고, 고강도 항레트로바이러스 요법의 시행 여부를 결정하는데 필요하다[3, 6, 7]. 또한, 치료 후 반응을 평가하는 기저치로 활용된다. 혈장 HIV RNA 정량검사법의 검출한계는 표준검사의 경우 200-400 copies/mL이며, 민감도가 높은 검사법은 20-80 copies/mL까지 검출할 수 있으므로 검사법의 변화가 있으면 이러한 차이점을 고려해야 한다.

**(4) 항레트로바이러스제 약제내성검사**

항레트로바이러스제에 내성인 바이러스가 전파될 수 있으므로 초

기 내원 시에 모든 사람면역결핍바이러스 감염인에 대해 유전형 약제내성검사를 시행해 내성여부를 평가해야 한다(A-III). 감염 초기 내성에 대한 평가 결과는 즉시 고강도 항레트로바이러스 요법을 받지 않는다고 하더라도 수 년 후의 치료제 선택에 유용하다(B-III).

**(5) 혈액검사**

기존의 연구에 따르면 진행된 사람면역결핍바이러스 감염인의 30-40%에서 빈혈, 백혈구감소증 또는 혈소판감소증을 보이며, 75%에서 간기능 또는 신기능 이상을 보였다[8]. 따라서 초기 내원 시에 모든 사람면역결핍바이러스 감염인에 대해 백혈구백분율(differential count)을 포함한 일반혈액검사(complete blood count, CBC)와 일반화학검사(basic chemistry)를 시행해야 한다(A-III). 사람면역결핍바이러스 감염인에서 빈혈, 백혈구감소증, 혈소판감소증 등의 혈액학적 이상이 흔하고, 내당능장애 또는 당뇨의 유병률이 높기 때문에 초기 내원 시에 일반혈액검사, 간기능검사, 공복혈당, 공복지질검사 등의 평가가 필요하다[9].

**(6) 결핵선별검사**

잠복결핵을 진단할 목적으로 결핵피부반응검사(tuberculin skin test, TST) 또는 IFN- $\gamma$  release assay (IGRA)를 시행해야 한다(A-I). 결핵피부반응검사상 경결(induration)의 직경이 5 mm 이상이면 양성으로 판정하는데, 검사 결과 양성이라면 활동결핵 여부를 확인해야 한다. 활동결핵이 아니고 과거에 결핵으로 치료받은 적도 없다면 잠복결핵에 대한 치료를 추천한다(A-I). 진행된 사람면역결핍바이러스 감염인에서 TST 음성인 경우에는 CD4+ T 세포수가 200개/mm<sup>3</sup> 이상으로 회복된 후 다시 검사할 것을 권장한다(A-III). 결핵환자와 긴밀하게 접촉한 사람면역결핍바이러스 감염인의 경우에는 결핵피부반응검사 결과와 상관없이 잠복결핵에 대해 치료를 받아야 한다(A-II). 결핵피부반응검사 음성인 경우 48주 간격으로 결핵피부반응검사를 반복하고 결핵환자에 노출된 경우는 언제든지 바로 검사해야 한다. 에이즈환자에서 결핵피부반응검사는 세포면역저하의 영향을 받는 제한점이 있으므로 호흡기증상이 있다면 결핵피부반응검사 결과와 상관없이 흉부방사선검사가 필요하며, 객담항산균(acid-fast bacilli, AFB) 염색과 결핵균 배양검사를 시행해야 한다[10] (A-II).

**(7) 바이러스성 간염 선별검사**

B형 간염에 대한 선별검사(HBsAg, anti-HBs Ab)를 시행해야 한다(A-III). B형 간염바이러스(hepatitis B virus, HBV)에 대한 항체가 없는

경우에는 백신접종을 받아야 한다[11] (B-II). HBsAg 음성이지만 HBcAg에 대한 항체가 양성인 경우 HBV DNA에 대한 중합효소연쇄 반응(polymerase chain reaction, PCR) 검사를 통해 만성 B형 간염 여부를 확인해야 한다(C-III). 또한, C형 간염바이러스(hepatitis C virus, HCV) 항체검사를 시행해야 한다(A-III). HCV 항체가 양성인 경우 HCV RNA 정량검사를 실시하여 확진한다(A-II). A형 간염 백신 접종 전 항체검사는 혈청 유병률이 지역사회 인구의 30%를 넘는 경우에 비용 효과적이며, 국내 연령별 항체 보유율을 고려하여 검사 여부를 결정한다[1] (B-III).

(8) 독소포자충 선별검사

독소포자충 항체검사를 실시해야 하는데(B-III), 초기 방문 시에 독소포자충 항체 음성인 경우 CD4+ T 세포수가 100개/mm<sup>3</sup> 미만으로 감소할 때 검사를 반복한다(C-III).

(9) 기타 기회감염에 대한 평가

진행된 사람면역결핍바이러스 감염인에서는 기회감염에 대한 평가 및 검사가 필요하다. 초기에 문진과 진찰, 일반혈액검사 등에서 기회감염의 가능성을 확인한 후에, 추가적으로 흉부방사선검사, 컴퓨터단층촬영(computed tomography, CT), 조직검사(림프절, 간 등이 상이 있는 부위), 혈청학적 검사(Cytomegalovirus, *Toxoplasma gondii*, *Cryptococcus neoformans* 등) 및 미생물학적 검사(*Pneumocystis jirovecii*, *Mycobacteria spp.* 등)를 시행해야 한다[12-15] (A-II).

CD4+ T 세포수가 100개/mm<sup>3</sup> 미만의 진행된 사람면역결핍바이러스 환자에 대해서는 안저검사를 시행해야 한다(B-II).

(10) 매독 선별검사

매독에 대한 선별검사가 시행되어야 하며, 이후에도 위험도에 따라서 주기적인 추적검사가 필요하다[12] (A-II). 48주 간격으로 정기적인 매독 선별검사를 시행해야 하며(Table 3), 다수의 파트너가 있거나 콘돔을 사용하지 않은 성접촉력이 있는 경우, 마약이나 항정신성 약물 복용 후 성접촉력이 있는 경우 등에는 12-24주 간격으로 자주 검사를 시행한다.

(11) 사람유두종바이러스(Human papilloma virus, HPV) 선별검사

남성간의 성행위자(men who have sex with men, MSM), 자궁경부 질 세포진검사(Pap test)에서 비정상 소견이 있었던 여성, 회음부 사마귀가 있는 사람면역결핍바이러스 감염인들의 경우는 항문 및 회음부의 HPV 선별검사를 받아야 한다(C-III).

(12) 기타 성매개질환에 대한 선별검사

사람면역결핍바이러스 여성 감염인은 모두 초기 방문 시에 트리코모나스증(trichomoniasis) 선별검사를 받아야 하며, 25세 미만 여성은 클라미디아(*Chlamydia*) 감염 여부를 점검해야 한다(A-II). 사람면역결핍바이러스 감염인은 모두 임질에 대한 선별검사를 받아야 한

다(B-II). 구체적으로, 임질은 특징적인 임상소견과 요도분비물의 그람염색을 통해 진단할 수 있고, 트리코모나스는 자궁경부 질 세포진 검사로 확인할 수 있다. 또한, 질액, 요도분비물, 성기 주위 병변의 검체를 갖고 PCR 키트(단독 또는 다중)를 이용해서 임질(*Neisseria gonorrhoea*), 클라미디아(*Chlamydia trachomatis*), 트리코모나스(*Trichomonas vaginalis*), *Mycoplasma genitalium*, *Ureaplasma urealyticum*, *Gardnerella vaginalis*, 연성하감(*Haemophilus ducreyi*), 단순 포진바이러스(Herpes simplex virus, HSV) 등의 성매개질환 병원체를 검출하는 진단적 검사를 시행할 수 있다.

3) 고강도 항레트로바이러스 요법이 필요하다고 판단된 환자에서 항레트로바이러스 약제를 투여하기 전에 확인해야 하는 실험실 검사는?

- 9. 고강도 항레트로바이러스 요법을 시행하기 전에 CD4+ T 세포수의 측정이 필요하며(A-II), 항레트로바이러스 요법을 시작하기 전 4주 이내 HIV RNA 수치를 확인해야 한다(B-I).
- 10. 여성에서 efavirenz의 투여가 고려되는 경우는 임신 반응 검사를 실시한다(A-III).
- 11. Abacavir 투여 전에는 HLA-B\*5701 검사의 시행을 고려하며(A-I), 검사가 불가능한 경우는 환자에게 과민반응 가능성과 주의사항을 충분히 설명한 후에 처방한다(B-III).
- 12. 고강도 항레트로바이러스 요법을 처음 시작하는 에이즈환자나 바이러스적 치료 실패로 치료약제의 변경을 고려하는 환자에서는 유전형 내성검사가 권장된다(A-III).

(1) 고강도 항레트로바이러스 요법 시작(항레트로바이러스 약제 변경) 전에 시행해야 할 검사

CD4+ T 세포수는 치료 시작 여부를 결정하는 인자로 치료시작(약제변경) 전에 측정해야 한다. 혈장 HIV RNA 역가는 고강도 항레트로바이러스 요법을 시작하면 12-24주 이내에 일반적으로 감소를 보인다. 따라서 치료시작 또는 약제변경 4주 이내에 혈장 HIV RNA 정량검사를 시행해 기저치를 확인해야 한다(B-I). 기본적으로 백혈구 백분율을 포함한 일반혈액검사, 일반화학검사, 간기능검사, 공복혈당검사, 공복지질검사 및 소변검사를 시행하고, 진찰이나 기본검사에서 기회감염의 가능성이 있으면 추가적인 검사를 시행해야 한다.

(2) Abacavir 투여 전 HLA-B\*5701 검사

Abacavir 과민반응은 다기관을 침범하는 임상적 증후군으로 대개 abacavir 투여 초기 6주 이내에 발생한다. 약제를 중단하면 신속하게 회복되지만 재투여 시 급속히 진행하며 치명적인 결과를 초래할 수 있다. 서양의 경우 abacavir 투여환자의 5-8%에서 발생하는 것으로 알려져 있으나 우리나라의 경우 534명의 사람면역결핍바이러스 감염인을 대상으로 HLA-B\*5701 검사를 시행했을 때 양성률은 0% (95% 신뢰구간 0-0.7%)였으며, 비감염인에서의 양성률(0.2-0.3%)과

일치하는 결과를 보였다. 동아시아지역의 일본(0%), 홍콩(0.003%) 등도 비슷한 결과를 보였다[16, 17]. 일부 서양인을 대상으로 한 HLA-B\*5701 검사의 민감도와 음성예측도가 100%로 높게 나왔지만 HLA-B\*5701 음성인 환자에서 과민반응 가능성을 완전히 배제할 수는 없으며, 특이도는 상대적으로 낮아서 HLA-B\*5701 양성인 감염인의 33-50%는 과민반응이 발생하지 않은 것으로 알려져 있다[18, 19].

원칙적으로 abacavir 투여 전에는 HLA-B\*5701 검사를 시행해야 한다(A-I). 대체약제가 없어 abacavir를 처방해야 하지만 HLA-B\*5701 검사가 불가능한 경우는 환자에게 과민반응의 가능성과 주의사항을 충분히 설명한 후에 처방한다(B-III).

(3) 고강도 항레트로바이러스요법 초치료 전 항레트로바이러스제 약제내성검사

IAS-USA panel은 지역사회에서 치료력이 없는 환자의 항레트로바이러스제 내성률이 5%를 넘으면 치료 전 내성검사를 추천하고 있다[20]. 국내 내성률은 5% 전후로 평가된다(방 등 2.5%; 김 등 4.8%; 송 등 8.8%)[21-23]. 고강도 항레트로바이러스요법을 처음 시작하는 에이즈환자나 바이러스적 치료실패로 치료제의 변경을 고려하는 환자에서는 유전형 내성검사가 권장된다(A-III).

(4) Efavirenz 투여 전 임신반응 검사

Efavirenz는 동물실험 결과 기형유발작용을 보였으며, 임신 1기에 복용한 산모의 태아에서 신경계 손상에 관한 여러 증례보고가 있었다[24, 25]. Efavirenz의 투여를 고려하는 가임기 여성환자에게는 임신반응 검사를 시행해야 한다(A-III).

4) 고강도 항레트로바이러스요법을 받고 있는 사람면역결핍바이러스 감염인에서 약제독성이나 기회감염과 관련된 실험실 검사의 시행 주기는?

13. 고강도 항레트로바이러스요법을 시행 받고 있는 환자에서 CD4+ T 세포수는 12-16주 간격으로 반복하는 것이 원칙이나 (A-I), 고강도 항레트로바이러스요법 2년 후에 면역기능이 회복되고 안정적인 경우에는 검사 간격을 24주로 늘릴 수 있고 (B-II), 특히 CD4+ T 세포수가 500개/mm<sup>3</sup> 이상인 경우에는 주치의의 판단에 따라 검사 간격을 더 늘리거나 CD4+ T 세포수의 측정 없이 임상 경과를 관찰할 수도 있다(C-III).

14. 고강도 항레트로바이러스요법을 시행 받고 있는 환자에서 혈장 HIV RNA 정량검사는 12-16주 간격으로 반복해야 한다 (A-III). 2년 이상 지속적인 바이러스 억제를 보이고 임상적으로 안정적이라면 24주 간격으로 추적조사 간격을 늘릴 수 있다(A-III).

15. 고강도 항레트로바이러스요법을 시행 받고있는 환자에서 일반혈액검사와 일반화학검사를 12-16주 간격으로 반복하며, 2년 이상 지속적인 바이러스 억제를 보이고 임상적으로 안정적

이라면 24주 간격으로 시행할 수 있다(A-III).

16. Zidovudine이 포함된 약제를 투여하는 경우는 치료시작 2-4주 후에 일반혈액검사 및 백혈구백분율 추적검사를 시행한다.

17. 일반화학검사, 간기능검사 및 공복지질검사는 치료시작 2-4주에 시행하며, 이후 일반화학검사와 간기능검사는 12-24주 간격으로 추적검사를 시행한다. 공복지질검사가 비정상이라면 24주 간격, 정상이라면 48주 간격으로 시행한다. 공복혈당검사가 비정상이라면 12-24주 간격, 정상이라면 24주 간격으로 반복한다.

18. 초기방문 및 고강도 항레트로바이러스요법 전에는 기회감염에 대한 평가가 필요하다. 고강도 항레트로바이러스요법 시작 후 기회감염의 위험이 점차 감소하지만 진행된 사람면역결핍 바이러스 감염인의 경우 치료초기 12개월 동안은 기회감염에 대한 집중적인 추적조사가 필요하다(B-II).

19. 바이러스성간염 및 기회감염에 대한 혈청학적 검사는 초기방문 검사에서 음성이라면 48주 간격으로 추적 조사한다(A-III).

(1) 고강도 항레트로바이러스요법을 시행 받고있는 환자에서 CD4+ T 세포수의 적절한 검사주기

CD4+ T 세포수는 치료반응 평가를 위해서 12-16주 간격으로 추적 조사해야 한다(A-I). 항레트로바이러스제 순응도가 좋아서 2년 이상 지속적인 바이러스억제를 보이고 임상적으로 안정적이라면 검사간격을 24주로 늘릴 수 있다(B-II).

(2) 고강도 항레트로바이러스요법을 시행 받고 있는 환자에서 혈장 HIV RNA 역가의 적절한 검사주기

혈장 HIV RNA 정량검사는 12-16주 간격으로 반복해야 한다(A-III). 항레트로바이러스요법의 순응도가 좋아서 2년 이상 지속적으로 바이러스억제를 보이고 임상적으로 안정적이라면 검사간격을 24주로 늘릴 수 있다(A-III).

(3) 고강도 항레트로바이러스요법을 시행 받고 있는 사람면역결핍 바이러스 감염인에서 약제독성의 평가를 위한 실험실적 검사의 적절한 간격

일반혈액검사 및 백혈구백분율 검사는 12-24주 간격으로 시행한다. 그러나 zidovudine이 투여되는 경우에는 치료시작 2-4주 후에 추적검사를 시행해야 한다. 일반화학검사, 간기능검사 및 공복지질검사는 치료시작 2-4주 후에 시행하며, 이후 일반화학검사와 간기능검사는 12-24주 간격으로 추적검사를 시행한다. 공복지질검사가 비정상이라면 24주 간격, 정상이라면 48주 간격으로 시행한다. 공복혈당검사가 비정상이라면 12-24주 간격, 정상이라면 24-48주 간격으로 반복한다. 소변검사는 48주 간격으로 시행하며, tenofovir를 투여 받은 환자에서는 추적조사 간격을 24주로 줄여야 하며 당뇨, 고혈압 등 신기능저하의 위험요인이 있는 경우는 더 자주 반복해야 한다.

(4) 고강도 항레트로바이러스요법을 시행 받고 있는 사람면역결핍 바이러스 감염인에서 기회감염과 관련된 검사시행 간격 대개 고강도 항레트로바이러스요법을 시작하면서 기회감염의 위험이 점차 감소하지만 진행된 사람면역결핍바이러스 감염인의 경우 치료초기 12개월 동안은 기회감염에 대한 집중적인 추적조사가 필요하다[26-28] (B-II). 매독, 결핵피부반응검사, 톡소포자충 항체, 거대세포바이러스 항체, 바이러스성 간염(A, B, C형) 검사는 초기 방문시에 음성이라면 48주 간격으로 추적 조사해야 한다(A-III).

5) 초기 평가 후에 고강도 항레트로바이러스요법을 시행하지 않고 관찰중인 사람면역결핍바이러스 감염인에서 질병진행 상태 및 기회감염과 관련된 실험실 검사의 시행주기는? (Table 3)

20. 고강도 항레트로바이러스요법을 시행 받지 않는 사람면역결핍 바이러스 감염인에서 CD4+ T 세포수와 혈장 HIV RNA 정량검사는 치료 시작시점 결정을 위해서 12-24주 간격으로 추적 조사해야 한다(A-I). 또한 일반혈액검사, 일반화학검사 등은 24-48주 간격으로 시행한다.

**Table 3.** Monitoring schedule for HIV-infected patients

|                              | HAART-naive patients |                   | HAART-experienced patients     |                                               |                               |                               |                             |                   |
|------------------------------|----------------------|-------------------|--------------------------------|-----------------------------------------------|-------------------------------|-------------------------------|-----------------------------|-------------------|
|                              | Initial visit        | follow-up         | HAART initiation/ modification | 2-4 weeks post HAART initiation/ modification | every 12-24 weeks             | every 24 weeks                | every 48 weeks              | Treatment failure |
| CD4+T-cell count             | ○                    | Every 12-24 weeks | ○                              |                                               | ○                             | a                             | a                           | ○                 |
| HIV RNA                      | ○                    | Every 12-24 weeks | ○                              | ○                                             | ○                             |                               |                             | ○                 |
| Resistance test              | ○                    |                   | ○                              |                                               |                               |                               |                             | ○                 |
| HLA-B*5701 test              |                      |                   | ○<br>(if considering ABC)      |                                               |                               |                               |                             |                   |
| CBC with differential        | ○                    | Every 12-24 weeks | ○                              | ○<br>(if on AZT)                              | ○                             |                               |                             |                   |
| Basic chemistry              | ○                    | Every 24-48 weeks | ○                              | ○                                             | ○                             |                               |                             |                   |
| Liver function test          | ○                    | Every 24-48 weeks | ○                              | ○                                             | ○                             |                               |                             |                   |
| Fasting glucose              | ○                    | Every 24-48 weeks | ○                              |                                               | ○<br>(if abnormal previously) | ○<br>(if normal previously)   |                             |                   |
| Fasting lipid profile        | ○                    | Every 48 weeks    | ○                              | ○                                             |                               | ○<br>(if abnormal previously) | ○<br>(if normal previously) |                   |
| Urinalysis                   | ○                    |                   | ○                              |                                               |                               | ○<br>(if on TDF)              | ○                           |                   |
| Chest X-ray                  | ○                    | Every 48 weeks    |                                |                                               |                               |                               | ○                           |                   |
| Tests for OI                 | ○                    | Every 48 weeks    |                                |                                               |                               |                               | ○                           |                   |
| Serology for hepatitis virus | ○                    | Every 48 weeks    |                                |                                               |                               |                               | ○                           |                   |
| STD screening                | ○                    |                   |                                |                                               |                               |                               | ○<br>(VDRL)                 |                   |
| Pregnancy test               |                      |                   | ○<br>(if considering EFV)      |                                               |                               |                               |                             |                   |

<sup>a</sup>임상적으로 안정적이며 바이러스가 억제된 경우 매 24주마다 검사 가능.  
<sup>b</sup>Basic chemistry includes serum Na, K, Cl, HCO<sub>3</sub>, BUN, creatinine, Ca, P and glucose.  
 CBC, complete blood count; OI, opportunistic infection; STD, sexually transmitted diseases.

- 21. 매독, 결핵 피부반응 검사, 독소포자충 항체, 거대세포바이러스 항체, 바이러스성 간염(A, B, C형) 검사는 초기 방문 시에 음성이라면 48주 간격으로 추적 조사해야 한다(A-III).
- 22. 백혈구백분율을 포함한 일반혈액검사는 12-24주 간격으로 시행한다. 초기 내원 시 검사결과가 정상이라면 일반화학검사와 간기능검사는 24-48주 간격, 공복혈당과 공복지질검사는 28-48주 간격으로 추적 조사한다.

(1) 고강도 항레트로바이러스요법을 시행하지 않고 있는 사람면역결핍바이러스 감염인의 CD4+ T 세포수와 혈장 HIV RNA 정량 검사주기

CD4+ T 세포수와 혈장 HIV RNA 정량검사는 치료 시작시점의 결정을 위해서 12-24주 간격으로 추적 조사해야 한다(A-I). 만약 환자에게 결핵, 거대세포바이러스 등의 기회감염이 발생했다면 CD4+ T 세포수와 혈장 HIV RNA 역가가 실제 환자의 사람면역결핍바이러스 감염병기보다 나쁘게 나타날 수 있다. 그러므로, 치료를 요하는 기회감염에 감염된 사람면역결핍바이러스 감염인은 급성기 치료 후 안정화되면 CD4+ T 세포수와 혈장 HIV RNA 정량검사를 반복해야 한다 [10, 29] (A-II).

(2) 고강도 항레트로바이러스요법을 시행하지 않고 있는 사람면역결핍바이러스 감염인에서 기회감염과 관련된 검사시행 간격  
매독, 결핵 피부반응 검사, 독소포자충 항체, 거대세포바이러스 항체, 바이러스성 간염(A, B, C형) 검사는 초기 방문 시에 음성이라면 48주 간격으로 추적 조사해야 한다(A-III).

(3) 고강도 항레트로바이러스요법을 시행하지 않고 있는 사람면역결핍바이러스 감염인에서 혈액검사 간격(일반혈액검사, 일반화학검사)  
일반혈액검사 및 백혈구백분율 검사는 12-24주 간격으로 시행한다. 초기 내원 시 검사결과가 정상이라면 일반화학검사와 간기능검사는 24-48주 간격, 공복혈당과 공복지질검사는 24-48주 간격으로 추적 조사한다(Table 3).

6) 항레트로바이러스제 억제내성검사는 언제 시행해야 하는가?

23. 바이러스적 치료실패 환자에서 억제중단 4주 이내에 내성검사를 시행해야 한다(A-II). 치료가 유예된 감염인은 치료 시작 시점에 내성검사를 재시행해야 한다(C-III). 고강도 항레트로바이러스요법에 바이러스적 치료실패를 보인 환자에서 혈장 HIV RNA 역가가 1,000 copies/mL 이상인 경우 치료제 선택을 위해 내성검사를 시행한다(A-I). HIV RNA 역가가 500-1,000 copies/mL 수준의 환자에서도 검사의 효율이 낮지만 내성검사 시행을 권장한다(B-II). 모든 사람면역결핍바이러스 감염 임신부는 치료 시작 전에 억제내성검사를 시행해야 한다(A-III). 고강도 항레트로바이러스요법 중 임신을 계획하는 경우 혈장 HIV RNA 역가가 1,000 copies/mL 이상인 경우는 억제내성검사를 시행한다(A-I).

(1) 항레트로바이러스제 억제내성검사의 시행시점

내성 검사법으로는 유전형 검사법(genotypic assay)과 표현형 검사법(phenotypic assay)이 있으며, 두 검사법의 장단점은 다음과 같다(Table 4). 내성검사를 시행할 수 있는 최소 바이러스양은 유전형 검사법의 경우 500-2,000 copies/mL이며, 표현형 검사법의 경우는 500-1,000 copies/mL 수준이다. 현재 일반적으로 시행되고 있는 내성 검사법은 실제 내성 바이러스가 존재해도 전체 바이러스의 10-20% 이하라면 내성변이를 검출할 수 없는 한계가 있다. 따라서, 억제 중단 후 4-6주가 경과하면 내성바이러스가 차지하는 비율이 감소하고 야생형 바이러스가 증가하기 때문에 바이러스적 치료실패 환자에서는 억제중단 4주 이내에 내성검사를 시행해야 한다[30-32] (A-II). 항레트로바이러스제 억제내성검사는 사람면역결핍바이러스 감염 진단 시에 모든 환자에서 시행해야 한다(A-III). 치료가 유예된 감염인은 치료 시작시점에 내성검사를 재시행해야 한다(C-III). 고강도 항레트로바이러스요법에 바이러스적 치료실패를 보인 환자에서 혈장 HIV RNA 역가가 1,000 copies/mL 이상인 경우 치료제 선택을 위해 내성검사를 시행한다(A-I). HIV RNA 역가가 500-1,000 copies/mL 수준의 환자에서도 검사의 효율이 낮지만 내성검사 시행을 권장한다(B-II). 모든 사람면역결핍바이러스 감염 임신부는 치료 시작 전에 억제내성검사를 시행해야 한다(A-III). 고강도 항레트로바이러스요법 중 임신

**Table 4.** Comparison of antiretroviral resistance tests: genotypic assay vs. phenotypic assay

| Type of assay    | Advantages                                                                                                                                                                                                                   | Disadvantages                                                                                                                                                                                                                      |
|------------------|------------------------------------------------------------------------------------------------------------------------------------------------------------------------------------------------------------------------------|------------------------------------------------------------------------------------------------------------------------------------------------------------------------------------------------------------------------------------|
| genotypic assay  | <ul style="list-style-type: none"> <li>- wide availability</li> <li>- rapid turn-around time (1-2 weeks)</li> <li>- less expensive</li> <li>- earlier detection of resistance</li> </ul>                                     | <ul style="list-style-type: none"> <li>- require expert interpretation</li> <li>- unable to assess mutational interactions</li> <li>- possible failure to detect minor variant</li> <li>- impossible for new drugs</li> </ul>      |
| phenotypic assay | <ul style="list-style-type: none"> <li>- direct measure of drug susceptibility</li> <li>- ability to assess net effect of mutational interactions and cross-resistance patterns</li> <li>- possible for new drugs</li> </ul> | <ul style="list-style-type: none"> <li>- longer turn-around time (3-4 weeks)</li> <li>- more expensive</li> <li>- appropriate cutoffs are not defined for all drugs</li> <li>- possible failure to detect minor variant</li> </ul> |



을 계획하는 경우 혈장 HIV RNA 역가가 1,000 copies/mL 이상인 경우는 약제내성검사를 시행한다(A-I). 항레트로바이러스제 치료 경험이 없는 환자와 바이러스적 치료실패 환자에서는 유전형 내성검사가 우선적으로 권장된다(A-III). 유전형 내성검사결과에서 변이가 복합적인 경우에는 부가적으로 표현형 내성검사를 시행한다(B-III). 표준유전형 내성검사법은 역전사효소억제제와 단백분해효소억제제의 돌연변이에 대한 검사만을 시행하기 때문에 통합효소억제제 중심 항레트로바이러스요법을 계획하는 환자에서 약제내성을 우려한다면 통합효소억제제에 대한 유전형내성검사를 추가로 시행해야 한다(C-III). 또한, 통합효소억제제 중심 항레트로바이러스요법에 실패를 보인 환자에서 통합효소억제제를 포함한 다른 약제조합으로 변경할 때에 통합효소억제제에 대한 유전형 내성검사를 시행해야 한다(B-III).

## 2. 고강도 항레트로바이러스요법 시작 시기

### 1) 서론

#### (1) 배경 및 범위

고강도 항레트로바이러스요법의 일차 목표는 사람면역결핍바이러스의 복제를 최대한 억제하여 HIV RNA 농도를 검출한계 미만으로 감소시키며, 이를 통해 기회감염이나 각종 합병증 발생을 억제하고 타인으로의 전파도 줄이는 것이다.

사람면역결핍바이러스와 관련된 질환의 발생 및 사망은 면역 저하 등의 직접적인 요인 이외에 바이러스 감염으로 인한 만성 염증이 간접적으로 장기에 영향을 미쳐서 발생할 수 있다. 사람면역결핍바이러스를 치료하지 않았을 경우 사람면역결핍바이러스 감염의 모든 임상 단계에 해로운 영향을 미칠 수 있으므로, 사람면역결핍바이러스에 감염되고 많은 시간이 지난 후에 치료를 시작하였을 경우에도 고강도 항레트로바이러스요법은 사람면역결핍바이러스 감염인에게 여러 측면에서 도움이 되는 것으로 알려져 있다. 여러 임상 연구들은 효율적인 고강도 항레트로바이러스요법을 통하여 바이러스 복제를 최대한 지속적으로 억제하고 CD4+ T 세포수를 높게 유지하는 것이 사람면역결핍바이러스와 관련된 신장 질환 등 몇 가지의 비-에이즈 정의 질환의 발생도 예방하거나 지연시킬 수 있음을 보여주고 있다. 또한, 고강도 항레트로바이러스요법을 통하여 바이러스 복제를 지속적으로 억제하여 면역을 회복시키는 것이 간질환, 심혈관 질환, 악성 종양 등과 같은 여러 질환들의 발생을 예방하거나 지연시킬 수 있다[33-38].

본 지침 내용은 치료경험이 없는 환자에서 고강도 항레트로바이러스요법을 시작해야 하는 시기에 대한 내용을 다루고 있다.

#### (2) 문헌 검색

본 분야의 진료 지침 작성을 위하여 PubMed (www.pubmed.gov) 검색 엔진을 사용하여 1995년 1월부터 2014년 11월까지의 기간 동안 국내외에서 출판된 문헌들을 검색하였다. 국내문헌은 동일한 기간

동안 KoreaMed (<http://www.koreamed.org>)와 한국학술정보(<http://Kiss.kstudy.com>)를 사용하여 검색하였다. 또한, 에이즈와 관련된 주요 국제 학술행사(International AIDS Society Conference, International AIDS Conference, Conference on Retroviruses and Opportunistic Infections 등)의 초록집도 함께 검색하였다. 검색어로는 사람면역결핍바이러스에 대해서는 'HIV' 또는 'Human immunodeficiency virus', 치료에 대한 검색어로는 'therapy' 또는 'treatment' 또는 'management' 또는 'antiretroviral therapy' 또는 "highly active antiretroviral therapy"를 사용하였으며, 치료 시작에 대하여서는 'start' 또는 'timing'을 검색 단어로 사용하여 이들 검색어들을 여러 조합으로 검색하였다.

#### (3) 핵심질문요약

- 모든 HIV 감염인에서 고강도 항레트로바이러스요법을 시행하는 것이 권고되는가?
- CD4+ T 세포수와 무관하게 고강도 항레트로바이러스요법이 더욱 필요한 경우는?
- 고강도 항레트로바이러스요법을 시행하기 전 약제 순응도를 위하여 고려해야 할 사항은 무엇인가?

#### 2) 모든 HIV 감염인에서 고강도 항레트로바이러스요법을 시행하는 것이 권고되는가?

1. 모든 HIV 감염인에게 고강도 항레트로바이러스요법을 시행할 것을 권고한다. 권고의 강도 및 근거수준은 CD4+ T 세포수에 따라 다르다.

- 1) CD4+ T 세포수 < 350개/mm<sup>3</sup> (A-I)
- 2) CD4+ T 세포수 350-500개/mm<sup>3</sup> (A-II)
- 3) CD4+ T 세포수 > 500개/mm<sup>3</sup> (B-III)

CD4+ T 세포수가 200개/mm<sup>3</sup> 미만인 사람면역결핍바이러스 감염인에서는 여러 기회 감염들뿐만 아니라 면역저하와 직접적으로 관련되어 있지 않는 각종 질환들의 발생 및 사망의 위험성이 증가된다. CD4+ T 세포수가 200개/mm<sup>3</sup> 미만인 감염인과 에이즈 정의 질환들이 발생한 병력이 있는 환자들을 대상으로 한 무작위 대조 연구들은 고강도 항레트로바이러스요법을 시행하는 것이 환자의 생존율을 향상시키고 사람면역결핍바이러스 질환의 진행을 지연시키는 것으로 보고하였다[39-41]. 또한, 여러 관찰 코호트의 장기 추적 결과들에서 CD4+ T 세포수가 200개/mm<sup>3</sup> 미만으로 면역저하가 진행된 상태에서 고강도 항레트로바이러스요법을 시작하는 것보다 200개/mm<sup>3</sup> 이상에서 치료를 시작하는 것이 환자의 임상 경과에 효과적이었다[39-43]. 따라서 에이즈 정의 질환의 병력이 있는 모든 사람면역결핍바이러스 감염인에서 고강도 항레트로바이러스요법을 시작해야 한다(A-I).

CD4+ T 세포수가 200개/mm<sup>3</sup> 이상인 환자에서 언제 고강도 항레트로바이러스요법을 시행하는 것이 효과적인지에 대해 여러 대규모, 무작위 대조 연구들이 시행되었다. CIPRA HT-001 연구는 아이티

에서 진행된 무작위 임상 연구로서 연구 참여자들은 CD4+ T 세포수가 200-350개/mm<sup>3</sup>일 때 고강도 항레트로바이러스요법을 시작한 군과 CD4+ T 세포수가 200개/mm<sup>3</sup> 이하로 감소하거나 에이즈 정의 질환이 발생하였을 때까지 고강도 항레트로바이러스요법을 지연한 군으로 무작위 배정되었다. 중간 보고 결과 CD4+ T 세포수가 200-350개/mm<sup>3</sup> 일 때 고강도 항레트로바이러스요법을 시작한 군에 비하여 200개/mm<sup>3</sup> 이하로 감소될 때까지 치료를 지연한 군에서 사망률(위험도=4.0,  $P=0.0011$ )과 결핵 발생률(위험도=2.0,  $P=0.0125$ )이 더 증가되어 임상 연구가 조기 종료되었다[44].

SMART (the Strategic Management of Antiretroviral therapy) 연구는 CD4+ T 세포수가 350개/mm<sup>3</sup> 이상인 5,400명 이상의 환자들을 대상으로 시행된 다국적 임상 시험으로서 연구 참여자들은 고강도 항레트로바이러스요법을 계속해서 시행 받는 군과 CD4+ T 세포수가 250개/mm<sup>3</sup> 미만으로 감소될 때까지 고강도 항레트로바이러스요법을 중단한 군으로 무작위 배정되었다. 연구 등록 당시에 고강도 항레트로바이러스요법을 시행 받고 있지 않았던 249명의 연구 참여자들을 대상으로 한 추가 분석에서 CD4+ T 세포수가 250개/mm<sup>3</sup> 미만으로 감소될 때까지 치료를 지연한 군에 비하여 바로 치료를 시작한 군에서 중대한 에이즈 관련 질환과 에이즈 비관련 질환이 발생할 위험성이 감소되었다( $P=0.06$ )[45].

이상의 연구 결과들로부터 CD4+ T 세포수가 350개/mm<sup>3</sup> 미만인 모든 사람면역결핍바이러스 감염인에서 고강도 항레트로바이러스요법을 시작해야 한다(A-I).

CD4+ T 세포수가 350-500개/mm<sup>3</sup>에서 고강도 항레트로바이러스요법을 시작하는 것을 권고하는 근거로는 대규모 관찰연구결과와 무작위 임상연구의 이차분석 결과들이 있다. 발전된 통계 기법을 이용하여 관찰연구 결과를 분석하여 비돌림이나 혼란변수의 영향을 최소화할 수 있다. 하지만 여전히 측정되지 않은 혼란변수의 영향들을 완전히 배제할 수는 없다. ART Cohort Collaboration (ART-CC)는 북미와 유럽에서 진행된 18개의 코호트 연구로부터 얻은 46,691명의 자료를 분석하였는데, 에이즈로의 진행이나 사망의 위험이 치료 시작 시점의 CD4+ T 세포수가 251-350개/mm<sup>3</sup>인 경우가 351-450개/mm<sup>3</sup>에서 치료를 시작했을 경우에 비해 높았다(위험도 1.28, 95% CI 1.04-1.57) [43]. 북미 코호트 연구들을 모아서 분석한 결과(NA-ACCORD)에서도 CD4+ T 세포수가 350개/mm<sup>3</sup> 미만으로 감소할 때까지 치료를 미루는 것에 비해서 351-500개/mm<sup>3</sup> 시점에서 치료를 시작하는 것이 다른 변수들을 보정해도 사망의 위험을 증가시키는 것으로 나타났다(위험도 1.60, 95% CI 1.26-2.26) [46]. CD4+ T 세포수가 350-499개/mm<sup>3</sup>인 5,527명의 환자가 분석에 포함된 유럽, 호주, 캐나다 코호트 연합 연구(CASCADE Collaboration)에서도 350개/mm<sup>3</sup> 미만으로 감소할 때까지 치료를 미룬 군에 비해서 치료를 미루지 않은 군이 에이즈의 발생이나 사망의 위험을 낮춘 것으로 나타났다[47].

HPTN052 연구는 다기관, 다국가에서 대규모로 진행된 무작위 배정 임상 시험이었는데, 고강도 항레트로바이러스요법이 HIV 감염의 전파 위험을 낮추는지 규명하기 위한 연구였다[48]. CD4+ T 세포수

가 350-550개/mm<sup>3</sup>인 1,763 명의 HIV 감염인과 그 파트너를 등록하여 치료를 즉시 시작한 군과, 250개/mm<sup>3</sup> 미만으로 감소했을 때 치료를 시작한 군으로 무작위 배정하여 HIV 감염 전파의 발생률을 비교하였다. 그 연구의 2차 목표는 조기 치료가 HIV 감염인에서 기회질환 등의 임상적 사건을 낮추는지 비교하는 것이었는데, 조기에 치료한 군에서 결핵 등 임상적 사건의 발생률이 유의하게 낮았다.

이러한 연구결과들은 CD4+ T 세포수가 350-500개/mm<sup>3</sup>에서 고강도 항레트로바이러스요법을 시작하는 것이 HIV 감염과 연관된 질병의 진행을 감소시킨다는 것을 나타내는데, 사망의 위험도 역시 낮추는지는 불분명하다. 이러한 연구들에 근거해서 CD4+ T 세포수가 350-500개/mm<sup>3</sup>인 모든 사람면역결핍바이러스 감염인에서 고강도 항레트로바이러스요법을 시작하는 것이 권고된다(A-II). 또한, HPTN 052 연구에서 나타난 것처럼 이 환자들에서 고강도 항레트로바이러스요법은 HIV 감염의 전파 위험을 낮출 수 있어서 사회적으로 HIV 감염의 전파를 예방하는데 도움이 된다[48].

CD4+ T 세포수가 500개/mm<sup>3</sup> 이상인 HIV 감염자를 대상으로 한 연구들은 다양한 연구 결과들을 보여준다. NA-ACCORD 연구에서 CD4+ T 세포수가 500개/mm<sup>3</sup> 이상 또는 미만에서 고강도 항레트로바이러스요법을 시작한 환자들에 대하여 분석을 시행하였다[46]. CD4+ T 세포수가 500개/mm<sup>3</sup> 이상에서 치료를 시작한 총 2,200명의 환자들에 비해 500개/mm<sup>3</sup> 미만으로 감소될 때까지 치료를 지연한 총 6,935명의 환자들에서 여러 요소들을 보정한 사망률이 의미있게 더 높았다(위험비: 1.64, 95% 신뢰구간: 1.37-2.79) [46]. 그러나 사망한 환자수가 상대적으로 적었으며 고강도 항레트로바이러스요법과 무관하게 사망에 영향을 미칠 수 있는 여러 요소들이 측정되지 않았을 수 있다는 제한점을 가지고 있다. NA-ACCORD 연구 결과와 다르게 18개의 코호트로부터 총 24,444명의 감염인들을 대상으로 시행된 ART-CC 코호트 연구는 CD4+ T 세포수가 450개/mm<sup>3</sup> 이상에서 고강도 항레트로바이러스요법을 시작하는 것의 효과를 보여주지 못하였다[43]. CD4+ T 세포수가 451-550개/mm<sup>3</sup>에서 치료를 시작한 환자들과 351-450개/mm<sup>3</sup>에서 치료를 시작한 환자들을 비교하였을 때, 두 환자군 사이에 에이즈로의 진행과 사망률이 유사하였다(위험비: 0.99, 95% 신뢰구간: 0.76-1.29). 그러나, 이 연구는 CD4+ T 세포수가 550개/mm<sup>3</sup> 미만에서 고강도 항레트로바이러스요법을 시작한 환자들만 분석 대상에 포함되었다는 제한점이 있다[43]. CASCADE 연구에서는 CD4+ T 세포수가 500-799개/mm<sup>3</sup>인 5,162명의 환자들을 대상으로 치료를 미룬 군과 치료를 바로 시작한 군을 비교하였는데, 양군 간에 질병의 진행이나 사망의 위험이 크게 다르지 않았다[47]. Set-point 연구에서는 혈청전환 후 6개월 이내의 조기 감염자들을 즉시 치료를 시작한 군과 치료를 미룬 군으로 무작위 배정하여 비교하였는데, 연구 참여자의 57% 이상이 500개/mm<sup>3</sup> 이상의 CD4+ T 세포수를 가지고 있었다[49]. 이 연구에서 항레트로바이러스 시작 기준에 해당하는 연구 종말점이 치료를 미룬 군에서 유의하게 높았고, 치료를 미룬 군에서 치료 시작 기준에 다다른 시간이 생각보다 매우 짧다는 것을 알 수 있었다.

CD4+ T 세포수가 500개/mm<sup>3</sup> 이상에서 치료를 시작하는 것은 공중 보건학적인 이점도 있다. CD4+ T 세포수가 높은 모든 HIV 감염인에서 항레트로바이러스 치료를 시작하는 것은 그 사회의 바이러스 농도를 전반적으로 낮추어 줌으로써 HIV 감염의 전파 위험을 낮출 수 있을 것이다.

위의 연구 결과들과 함께 사람면역결핍바이러스 감염을 치료하지 않았을 경우 많은 비-에이즈 정의 질환이 발생할 위험성이 증가될 수 있기 때문에, CD4+ T 세포수가 500개/mm<sup>3</sup> 이상에서 고강도 항레트로바이러스요법을 시작하는 것의 장점이 있다.

이상의 연구들과 주장들에 근거해서 고강도 항레트로바이러스요법을 500개/mm<sup>3</sup> 이상의 CD4+ T 세포수에서 조기에 시작하는 것이 권고된다(B-III). 하지만, 치료를 시작할 때, 이러한 CD4+ T 세포수가 높은 환자에서 항레트로바이러스요법의 이점이 확정적이지 않다는 점과, 전파의 위험을 낮출수 있다는 점, 질병 진행의 위험을 낮출 수 있다는 점 등에 대해 상의해야 한다.

3) CD4+ T 세포수와 무관하게 고강도 항레트로바이러스요법이 더욱 필요한 경우는?

2. 사람면역결핍바이러스 감염인에서는 다음의 경우 중 하나에 해당될 경우 CD4+ T 세포수와 무관하게 고강도 항레트로바이러스요법을 시작하는 것을 권고한다.

- 1) 임신부(A-I)
- 2) 에이즈 정의 질환(A-I)
- 3) 사람면역결핍바이러스 연관 신병증(HIV-associated nephropathy) (A-II)
- 4) HBV 동시 감염 환자(A-II)
- 5) HCV 동시 감염환자(B-II)
- 6) CD4+ T 세포수가 매년 100개/mm<sup>3</sup> 이상 감소되는 경우(A-III)
- 7) HIV RNA 혈중농도가 10<sup>5</sup> copies/mL 이상인 경우(B-II)
- 8) 급성 HIV 감염(B-II)

(1) 임신부

고강도 항레트로바이러스요법을 시행하여 산모의 혈중 HIV RNA 농도를 효율적으로 감소시키는 것이 주산기 수직 감염을 감소시키는 데 가장 중요한 요소이다. 따라서, 산모의 건강과 산모로부터 신생아로의 수직 감염을 예방하기 위하여 사람면역결핍바이러스에 감염된 모든 임신부에게 고강도 항레트로바이러스요법 시행을 권고한다(A-I). 임신한 사람면역결핍바이러스 감염 여성에게 적어도 임신 2기까지는 고강도 항레트로바이러스요법이 시작되어야 하고, 분만 후에도 치료가 지속되어야 한다[50].

(2) 사람면역결핍바이러스 연관 신병증(HIV-associated nephropathy)

사람면역결핍바이러스 연관 신병증은 사람면역결핍바이러스 감

염인에서 말기 신질환으로 이르게 하는 만성 신질환의 가장 흔한 원인이다[51]. 사람면역결핍바이러스 연관 신병증은 어떠한 CD4+ T 세포수에서도 발생할 수 있으며, 지속적인 사람면역결핍바이러스 복제가 직접적으로 신손상을 유발할 수 있어서, HIV 복제가 최대한 억제되어 있는 환자들에게서는 극히 드물게 발생한다[52, 53]. 여러 연구에서 사람면역결핍바이러스 연관 신병증을 가지고 있는 환자들에서 고강도 항레트로바이러스요법은 신기능의 보존 및 생존율 향상과 연관되어 있음을 보고하였다[54-56]. 따라서, 사람면역결핍바이러스 연관 신병증을 가지고 있는 사람면역결핍바이러스 감염인에게 고강도 항레트로바이러스요법이 시작되어야 한다(A-II).

(3) HBV 동시 감염 환자

사람면역결핍바이러스 감염은 간경변, 말기 간질환, 간암과 같은 바이러스성 간염과 관련된 간질환이 더 빠르게 진행되게 한다[57, 58]. 따라서, 고강도 항레트로바이러스요법은 면역 기능을 보존하거나 회복시키고 사람면역결핍바이러스와 관련된 면역 활성화와 염증을 감소시킴으로써 HBV와 동시 감염되어 있는 사람면역결핍바이러스 감염인에서 간질환의 진행을 지연시킬 수 있다[59-61]. 사람면역결핍바이러스와 HBV 모두에 대하여 효과가 있는 항레트로바이러스 약제(예, tenofovir, lamivudine, emtricitabine)들이 HBV의 복제를 직접 억제함으로써 임상적으로 중요한 간질환의 발생도 예방할 수 있다[62, 63]. 만성 바이러스성 간염이 있을 경우 고강도 항레트로바이러스요법에 자체에 의하여 간손상이 발생할 위험성이 증가될 수도 있지만, 간염바이러스에 동시 감염된 사람면역결핍바이러스 감염인의 대부분에서(특히, 권고된 고강도 항레트로바이러스요법을 시행 받고 있는 감염인에서) 항레트로바이러스 약제에 의하여 임상적으로 중요한 간손상이 발생하지는 않는 것으로 알려져 있다[64]. 이러한 연구 결과들은 HBV에 동시 감염된 사람면역결핍바이러스 감염인에서 고강도 항레트로바이러스요법을 조기에 시행하는 것이 간질환이 진행될 위험성을 감소시킬 수 있다는 것을 보여주고 있다. 사람면역결핍바이러스와 HBV에 함께 감염된 환자들에서 HBV에 대한 치료가 필요한 경우 사람면역결핍바이러스와 HBV에 대하여 모두 효과적인 약제를 포함하는 고강도 항레트로바이러스요법을 시행해야 한다(A-II).

(4) HCV 동시 감염환자

사람면역결핍바이러스 감염은 간경변, 말기 간질환, 간암과 같은 바이러스성 간염과 관련된 간질환이 더 빠르게 진행되게 한다[57, 58]. 따라서, 고강도 항레트로바이러스요법은 면역 기능을 보존하거나 회복시키고 사람면역결핍바이러스와 관련된 면역 활성화와 염증을 감소시킴으로써 HCV와 동시 감염되어 있는 사람면역결핍바이러스 감염인에서 간질환의 진행을 지연시킬 수 있다[60, 61]. 항레트로바이러스 약제들이 HCV의 복제를 직접적으로 억제할 수는 없지만, 고강도 항레트로바이러스요법을 시행하여 사람면역결핍바이러스 복제가 조절되고 CD4+ T 세포수가 증가된다면 HCV에 대한 치료 효

과가 향상될 수 있다[65]. 만성 바이러스성 간염이 있을 경우 고강도 항레트로바이러스요법 자체에 의하여 간손상이 발생할 위험성이 증가될 수도 있지만, 간염바이러스에 동시 감염된 사람면역결핍바이러스 감염인의 대부분에서(특히, 권고된 고강도 항레트로바이러스요법을 시행 받고 있는 감염인에서) 항레트로바이러스 약제에 의하여 임상적으로 중요한 간손상이 발생하지는 않는 것으로 알려져 있다[64]. 이러한 연구 결과들은 HCV에 동시 감염된 사람면역결핍바이러스 감염인에서 고강도 항레트로바이러스요법을 시행하는 것이 간 질환이 진행될 위험성을 감소시킬 수 있다는 것을 보여주고 있다 (B-II).

(5) HIV RNA 혈중농도 및 CD4+ T 세포수 감소 속도

매년 100개/mm<sup>3</sup> 이상으로 빠르게 CD4+ T 세포 수가 감소될 때에도 고강도 항레트로바이러스요법을 시작하는 것이 여러 임상 측면에서 많은 도움을 줄 수 있다[66] (A-III). 사람면역결핍바이러스 감염인에서 HIV RNA 혈중 농도가 10<sup>5</sup> copies/mL 미만인 경우에 비하여 10<sup>5</sup> copies/mL 이상인 경우에서 에이즈 정의 질환이 발생하거나 사망할 위험성이 더 높다[2] (B-II).

(6) 급성 HIV 감염

급성 HIV 감염에서 항레트로바이러스요법을 시작해야 하는지에 대해서 많은 논란이 있어 왔다. 조기에 치료를 시작하면 림프조직의 파괴를 줄여주고, 림프구의 양적, 기능적 손상을 줄여주고, 바이러스 저장소를 줄여줄 수 있으며, 치료 중단 후에도 최저 바이러스 농도(viral set point)를 낮춰줄 수 있는 등의 장점이 있다[67-69]. 또한, 초기 HIV 감염자들을 대상으로 치료를 즉시 시작한 군과 치료를 미룬 군을 비교하는 무작위 대조 연구도 시행된 바 있는데, 치료 중단 후에 CD4+ T 세포수의 감소 속도가 조기에 치료를 시작한 군에서 더 느리게 나타났다[49, 70]. 또한, 초기 감염 시기가 HIV 전파의 위험이 가장 큰 시기이므로, 이 시기에 치료를 시작하는 것은 사회적으로 전파를 예방하는 효과도 있을 것이다.

4. 고강도 항레트로바이러스요법을 시행하기 전 약제 순응도를 위하여 고려해야 할 사항은 무엇인가?

3. 고강도 항레트로바이러스요법을 시작하는 사람면역결핍바이러스 감염인들은 평생 장기적으로 약물 치료를 시행하는 것에 동의하고 충분한 약물 치료에 대한 의지를 가지고 있어야 하며, 약물 치료의 효과와 위험성 및 약물 순응도의 중요성을 이해하고 있어야 한다(A-III).

고강도 항레트로바이러스요법을 시작하는 사람면역결핍바이러스 감염인들은 장기적으로 약물 치료를 시행하는 것에 동의하고 충분한 약물 치료에 대한 의지를 가지고 있어야 하며, 약물 치료의 효과와 위험성 및 약물 순응도의 중요성을 이해하고 있어야 한다(A-III). 조기에 고강도 항레트로바이러스요법을 시행할 때에는 특히 항레트

로바이러스 약제에 의한 부작용(특히 장기 부작용들), 약제 내성의 발생, 항레트로바이러스 치료에 대한 순응도 감소, 약물 비용에 대하여 충분히 고려해야 한다.

과거에 사용되었던 항레트로바이러스 약제에 비하여 최근에 새로 개발되어 사용하고 있는 항레트로바이러스 약제가 일반적으로 잘 적응되고 부작용이 적으며, 복용이 편리하고, 강한 효과를 가지고 있지만, 이러한 새로운 약제들에 대한 장기적인 안전성을 평가한 자료는 아직 적기 때문에 이에 대한 주의가 필요하다.

D:A:D 연구는 뉴클레오시드 역전사효소 억제제와 단백분해효소 억제제 계열의 약제들 중에서 일부 약제들의 사용력이 증가될수록 심혈관 질환의 발생률이 증가하는 것을 보고하고 있다[36]. SMART 연구에서 고강도 항레트로바이러스요법을 중단하거나 지연하였던 환자들에 비하여 고강도 항레트로바이러스요법을 지속적으로 시행하였던 환자들에서 골밀도가 의미 있게 더 많이 감소되어 있는 것을 알 수 있었다[71]. 최근에 개발된 항레트로바이러스 약제의 경우 장기적인 부작용에 대한 연구가 충분하지 않다.

현재 사용되고 있는 항레트로바이러스 약제들이 삶의 질을 감소시키는 부작용들을 일으킬 수 있고 매일 약을 복용해야 하는 불편함을 초래할 수 있기 때문에, 특히 무증상 사람면역결핍바이러스 감염인에서 조기에 고강도 항레트로바이러스요법을 시작하는 것이 이들 감염인의 삶의 질을 감소시킬 수 있다는 점도 고강도 항레트로바이러스요법 시작 시기를 결정하는데 고려해야 한다.

3. 치료경험이 없는 환자에서의 고강도 항레트로바이러스요법

1. 초치료 환자에서 2제의 뉴클레오시드 역전사효소 억제제 (NRTI backbone) + 1제의 단백분해효소 억제제, 비뉴클레오시드 역전사효소 억제제 또는 통합효소 억제제 중의 한가지를 제 3의 약제로 병용해서 투여한다(A-I).
2. NRTI backbone은 tenofovir/emtricitabine 또는 abacavir/lamivudine을 우선적으로 고려하며(A-I), 앞의 NRTI backbone 사용이 곤란한 경우 zidovudine/lamivudine을 고려할 수 있다(B-I).
3. 단백분해효소 억제제는 ritonavir-boosted darunavir, ritonavir-boosted atazanavir, ritonavir-boosted lopinavir를 우선적으로 고려하며(A-I), 앞의 약물 사용이 곤란한 경우 unboosted atazanavir 투여를 고려할 수 있다(B-I). 단, unboosted atazanavir는 tenofovir와 함께 사용할 수 없다.
4. 비뉴클레오시드 역전사효소 억제제는 efavirenz를 우선적으로 고려하며, HIV RNA RNA < 100,000 copies/mL 일 경우에는 rilpivirine도 우선적으로 고려할 수 있다(A-I).
5. 통합효소 억제제를 사용할 경우에는 raltegravir 또는 cobicistat-boosted elvitegravir를 우선적으로 고려할 수 있다(A - I). Cobicistat-boosted elvitegravir는 tenofovir/emtricitabine/elvitegravir/cobicistat 복합제제 형태로만 유통된다.

1) 서론

(1) 배경 및 범위

본 지침은 처음으로 항레트로바이러스 치료를 받은 환자에게 어떤 약물을 투여할 것인가를 다루고 있다.

(2) 문헌 검색

본 분야의 진료 지침 작성을 위하여 Pubmed(www.pubmed.gov) 검색 엔진을 사용하여 1997년 1월부터 2014년 11월까지의 기간 동안 국외에서 출판된 문헌들을 검색하였다. 또한, 사람면역결핍바이러스/에이즈와 관련된 주요 학술 행사(International AIDS Society Conference, International AIDS Conference, Conference on Retroviruses and Opportunistic Infections, ID Week, Interscience Conference on Antimicrobial Agents and Chemotherapy, International Workshop on Antiviral Drug Resistance)의 초록집도 함께 검색했다. 문헌 검색은 'Clinical Trial'로 검색 조건을 제한한 후 주요 사람면역결핍바이러스 치료 약제명을 검색어로 입력해서 이루어졌다. 그 외에 미국 FDA에서 승인 받은 약물처방정보(prescribing information)도 참고하였다.

(3) 핵심질문 요약

- 초치료 환자에서 고강도 항레트로바이러스요법은 어떠한 약제들로 구성하는가?
- 어떤 뉴클레오시드 역전사효소 억제제 조합을 우선적으로 고려하는 것이 타당한가? 각 뉴클레오시드 역전사효소 억제제 조합의 장단점 및 특징은?
- 제 3의 약물로 단백분해효소 억제제를 사용해야 하는 경우 어떤 약제를 선택해야 하는가? 각 단백분해효소 억제제의 장단점 및 특징은?
- 제 3의 약물로 비뉴클레오시드 역전사효소를 사용해야 하는 경우 어떤 약제를 선택해야 하는가? 각 약제들의 장단점 및 특징은?
- 제 3의 약물로 통합효소 억제제를 사용할 경우 어떤 약제를 선택해야 하는가? 각 약제들의 장단점 및 특징은?
- 고강도 항레트로바이러스요법에서 피해야 할 약제 조합은?

2) 초치료 환자에서 고강도 항레트로바이러스요법은 어떤 약제들로 구성하는가?

1. 초치료 환자에서 2제의 뉴클레오시드 역전사효소 억제제 (NRTI backbone) + 1제의 단백분해효소 억제제, 비뉴클레오시드 역전사효소 억제제 또는 통합효소 억제제 중의 한가지를 제 3의 약제로 병용해서 투여한다(A-I).

(1) 초치료 환자에서 항레트로바이러스제 선정의 원칙

특별한 사유가 없는 한 2제의 뉴클레오시드 역전사효소 억제제 조합에 다른 계열의 약물 1제를 제 3의 약물로 추가해서 투여하되, 단백분해효소 억제제, 비뉴클레오시드 역전사효소 억제제, 통합효소 억

제제 중의 하나를 선정해서 사용한다(A-I 또는 B-I).

구체적으로 추천되는 약제 조합은 Table 5와 같으며, column A와 B에서 한 가지씩을 선택해서 조합한다.

국내 진료지침에서는 LPV/r를 preferred regimen에 포함시키고 있다. 이는 미국 Department of Health and Human Service, International AIDS Society - USA panel, European AIDS Clinical Society의 지침과 다른 점이다. European AIDS Clinical Society의 이전 지침에서는 LPV/r를 preferred regimen에 포함시키고 있었으나 가장 최근 지침에서는 LPV/r를 alternative regimen에 포함시키고 있다. LPV/r는 하루 2회 투여해야 하는 불편함이 있고 장기 투여시 심혈관 질환의 위험이 증가하는 문제가 있다. 하지만 우리나라 HIV 감염인에서 심혈관 질환의 위험도는 비감염인과 비교하였을 때 높지 않았고 하루 2회 투여하는 불편함에도 불구하고 많은 국내 HIV 감염인들이 LPV/r를 투여 받고 있기 때문에 임상진료지침위원회는 LPV/r를 preferred regimen으로 분류하기로 하였다[72]. 국외 지침에서는 ABC/3TC와 DRV/r 혹은 RPV, RAL의 조합을 임상경험이 부족하기 때문에 alternative regimen으로 분류하고 있으나 임상진료지침위원회에서는 외국 지침보다 더 포괄적인 기준을 적용하여 preferred regimen으로 분류하였다.

- 3) 어떤 뉴클레오시드 역전사효소 억제제 조합을 우선적으로 고려하는 것이 타당한가? 각 뉴클레오시드 역전사효소 억제제 조합의 장단점 및 특징은?

2. NRTI backbone은 tenofovir/emtricitabine 또는 abacavir/lamivudine을 우선적으로 고려하며(A-I), 앞의 NRTI backbone 사용이 곤란한 경우 zidovudine/lamivudine을 고려할 수 있다(B-I).

- (1) 각 뉴클레오시드 역전사효소 억제제 조합(Table 5의 column A)의 장단점 및 특징

① Tenofovir/emtricitabine (A-I)

Tenofovir/emtricitabine은 식사와 상관 없이 하루 1번 복용하는 약물로, tenofovir/emtricitabine 복합제가 이미 국내에 출시되고 있기 때문에 하루 1번 1알로 NRTI backbone 투약이 해결된다는 편리함이 있다. 그리고 tenofovir/emtricitabine/elvitegravir/cobicistat 복합제도 출시되었기 때문에 하루 1번 1알로 항레트로바이러스 치료를 할 수 있다는 장점도 있다. 또한, 많은 임상 연구에서 효과가 입증되었다는 것도 이 약의 장점이다. Tenofovir/emtricitabine은 HBV도 효과적으로 억제하기 때문에 HIV와 HBV 모두에 감염된 환자에서 특히 유용하다는 장점도 있다. 대표적인 단점으로는 장기간 투여했을 때 신기능 저하, 골밀도 감소 등의 부작용이 나타날 수 있다는 점, atazanavir의 혈중 농도를 떨어뜨리기 때문에 unboosted atazanavir와 투여하는 것은 곤란하다는 점 등을 들 수 있다.

Tenofovir/emtricitabine은 zidovudine/lamivudine와 비교 연구(양군 모두 efavirenz를 제 3의 약제로 병용함)에서 더 우수한 항바이러스

**Table 5.** Initial combination regimen for antiretroviral-naïve patients

| Select 1 combination in column A and 1 drug in column B | A                            | B                      |                  |
|---------------------------------------------------------|------------------------------|------------------------|------------------|
| Preferred (A-I)                                         | TDF/FTC <sup>a,b,c</sup>     | PI/r <sup>h</sup>      |                  |
|                                                         | ABC/3TC <sup>a,d,e,f,g</sup> | DRV/r                  |                  |
|                                                         |                              | LPV/r <sup>i,j</sup>   |                  |
|                                                         | ATV/r                        |                        |                  |
|                                                         | NNRTI                        |                        |                  |
|                                                         | EFV <sup>k</sup>             |                        |                  |
|                                                         | RPV <sup>l</sup>             |                        |                  |
|                                                         | INSTI                        |                        |                  |
|                                                         | RAL                          |                        |                  |
|                                                         | EVG/COBI <sup>m</sup>        |                        |                  |
|                                                         | Alternative (B-I)            | ZDV/3TC <sup>a,n</sup> | PI               |
|                                                         |                              |                        | ATV <sup>o</sup> |

<sup>a</sup>FTC could be substituted by 3TC or vice versa.  
<sup>b</sup>TDF should be prescribed with caution in patients with renal diseases and/or decreased bone mineral density.  
<sup>c</sup>TDF and FTC co-formulated drug is available.  
<sup>d</sup>Fatal hypersensitivity reaction could be happen by ABC, retriial is contraindicated when hypersensitivity reaction is suspicious.  
<sup>e</sup>Hypersensitivity to ABC is related to HLA-B\*5701.  
<sup>f</sup>Special caution is required when ABC is used in patients with (a) cardiovascular risk factor(s).  
<sup>g</sup>ABC and 3TC co-formulated drug is available.  
<sup>h</sup>Ritonavir-boosted PI.  
<sup>i</sup>Either LPV/r 400 mg/100 mg bid or 800 mg/200 mg qd is acceptable.  
<sup>j</sup>The frequency of side effects is higher than other PIs.  
<sup>k</sup>Special attention is required, when administered during 1<sup>st</sup> trimester and alternative regimen should be considered in sexually active women with no effective and consistent contraception.  
<sup>l</sup>Only if HIV RNA <100,000 copies/mL.  
<sup>m</sup>Available only as a single coformulated tablet as tenofovir/emtricitabine/ elvitegravir/cobicistat.  
<sup>n</sup>ZDV and 3TC co-formulated drug is available.  
<sup>o</sup>Unboosted ATV should not be used with TDF.

스 효과를 보였다[73].

Tenofovir/emtricitabine과 abacavir/lamivudine의 효과를 비교한 ACTG 5202 연구에서, 치료 시작 당시 RNA  $\geq 100,000$  copies/mL인 환자 군에서 tenofovir/emtricitabine이 더 효과적이었다[74]. 그러나 HEAT 연구에서는 tenofovir/emtricitabine과 abacavir/lamivudine 간의 효과에서 큰 차이가 없었다[75]. 이외에도 다수의 임상 연구에서 tenofovir/emtricitabine가 포함된 약제 조합의 효과가 확인되었다 [76-87].

Tenofovir는 근위 세뇨관 손상, 급성 세뇨관 괴사, 단백뇨, 당뇨(glycosuria) 등의 신장 손상을 유발할 수 있다[88, 89]. 특히, 진행된 HIV 감염인, 장기 처방, 기저 신장 질환, 단백분해효소 억제제와 동시 투여, cobicistat과 동시 투여 시 주의해야 한다[75, 88, 90-95]. 한편, 저체 중의 아시아인 및 여성에서 신장 기능 손상이 더 심할 수 있다는 보고

가 있기 때문에 이에 대한 주의도 필요하다[96, 97].

Tenofovir는 골밀도 감소도 유발할 수 있는데, tenofovir/emtricitabine이 포함된 항바이러스 치료를 받는 환자는 abacavir/lamivudine이 포함된 치료제를 투여받은 환자에 비해서 유의한 골밀도 감소를 보였다[98, 99]. 또한, tenofovir는 골밀도 감소에 의한 골절의 위험을 높일 수 있다[100].

② Abacavir/lamivudine (A-I)

식사와 상관없이 복용이 가능하고, abacavir/lamivudine 복합제가 국내에 유통되고 있기 때문에 하루 1번 1알로 NRTI backbone 투약이 해결된다는 장점이 있다. 대표적인 단점으로 드물지만 abacavir에 의해 치명적인 과민반응이 유발될 수 있다는 점, HIV RNA  $\geq 100,000$  copies/mL일 경우 tenofovir/emtricitabine에 비해 치료효과가 떨어질 수 있다는 점, 심혈관 질환 위험인자가 있는 환자에서는 투여에 신중을 기해야 한다는 점을 들 수 있다.

외국의 연구에서, HLA-B\*5701과 abacavir 과민반응이 밀접히 연관되어 있으며, 사전 HLA-B\*5701 스크리닝을 통해서 과민반응을 피할 수 있는 것으로 보고되었으며[16, 19, 101], 국내에서도 HLA-B\*5701와 연관되었을 것으로 추정되는 과민반응 사례가 보고된 바가 있다 [102]. 하지만 HLA-B\*5701의 빈도가 적은 우리나라와 중국 등에서도 HLA-B\*5701 스크리닝을 꼭 권장해야 할 지에 대해서는 회의적인 의견도 있다[17, 103].

ACTG 5202 연구에서 abacavir/lamivudine 투여군은 tenofovir/emtricitabine 투여군에 비해 혈중 지단백 이상을 더 많이 초래할 수 있는 것으로 알려져 있다[104]. 한편, D:A:D 연구, SMART 연구 등에서 abacavir 투여는 심혈관 질환의 빈도를 높일 수 있는 것으로 보고되었다[105-107]. 하지만 abacavir 투여와 심혈관 질환 발병의 연관성이 없다는 보고도 있다[108, 109]. 따라서 현재까지 abacavir 투여와 심혈관 질환의 관계는 명확하지 않다고 보는 것이 타당하다. 다만, 명확한 결론이 나올 때까지는 이에 대한 주의를 기울이는 것이 좋겠다.

ACTG 5202 연구에서, 치료 시작 당시 HIV RNA <100,000 copies/mL인 환자군에서는 abacavir/lamivudine과 tenofovir/emtricitabine의 치료 효과가 비슷했으나, HIV RNA  $\geq 100,000$  copies/mL인 환자군에서는 abacavir/lamivudine이 tenofovir/emtricitabine에 비해 치료 효과가 떨어지는 것으로 보고되었다[74, 110]. 한편, HEAT 연구에서는 abacavir/lamivudine과 tenofovir/emtricitabine 간의 효과에서 큰 차이가 없었다[75].

Abacavir/lamivudine 투여군과 zidovudine/lamivudine 투여군을 비교한 연구에서(양 군 모두 efavirenz를 제 3의 약제로 병용함)에서 바이러스 억제 정도는 서로 비슷했지만 CD4+ T 세포수의 상승 정도는 abacavir/lamivudine 투여군에서 더 높았다[111].

③ Zidovudine/lamivudine (B-I)

Zidovudine/lamivudine 복합제가 국내에도 유통되기 때문에 복용해야 할 약물 개수가 적다는 점(1알씩 하루 2회 복용)과, 식사와 상관

없이 복용할 수 있다는 장점이 있다. 대표적인 단점으로는 하루 2번 복용해야 하는 점, zidovudine 성분에 의해 구토, 빈혈 같은 부작용을 종종 초래한다는 점, 최근에 개발된 약제에 비해 효과가 떨어진다는 점 등을 들 수 있다.

Zidovudine/lamivudine 투여군과 tenofovir/emtricitabine 투여군을 비교한 연구에서(양 군 모두 efavirenz를 제 3의 약제로 병용함), zidovudine/lamivudine은 tenofovir/emtricitabine 비해 치료 효과, 부작용 발현 등의 면에서 열등한 것으로 보고되었다[73]. 또한, zidovudine/lamivudine 투여군과 abacavir/lamivudine 투여군을 비교한 연구에서(양 군 모두 efavirenz를 제 3의 약제로 병용함), 바이러스 억제 정도는 큰 차이가 없었지만, 48주 후 CD4+ T 세포수의 상승 정도에서 zidovudine/lamivudine 투여군은 155개/mm<sup>3</sup>, abacavir/lamivudine 투여군은 209개/mm<sup>3</sup>로 abacavir/lamivudine이 더 우월하였다[111]. 다만 zidovudine/lamivudine + efavirenz, tenofovir/emtricitabine + efavirenz, didanosine/emtricitabine + atazanavir의 치료 성적을 비교한 다국적 연구에서는 zidovudine/lamivudine + efavirenz 조합은 tenofovir/emtricitabine + efavirenz와 비슷한 효과를 보였고, didanosine/emtricitabine + atazanavir에 비해서 더 우수한 효과를 보였다[112].

- 4) 제 3의 약물로 단백분해효소 억제제를 사용해야 하는 경우 어떤 약제를 선택해야 하는가? 각 단백분해효소 억제제의 장단점 및 특징은?

3. 단백분해효소 억제제는 ritonavir-boosted darunavir, ritonavir-boosted atazanavir, ritonavir-boosted lopinavir를 우선적으로 고려하며(A-I), 앞의 약물 사용이 곤란한 경우 unboosted atazanavir 투여를 고려할 수 있다(B-I). 단, unboosted atazanavir는 tenofovir와 함께 사용할 수 없다.

- (1) 단백분해효소 억제제를 제 3의 약물(Table 1의 column B)로 사용할 경우 각 약물의 장단점 및 특징

단백분해효소 억제제는 내성 장벽(genetic barrier to resistance)이 높다는 장점이 있으며, 치료 실패 후에도 내성이 잘 유발되지 않는다. 반면, 이 계열의 약물은 CYP3A4의 기질이면서, CYP 효소들을 유도 또는 억제하기 때문에 약물 상호작용이 종종 문제가 되며, 대사적 합병증(고지혈증, 인슐린 내성, 간 독성 등) 및 위장관 부작용이 흔하다는 단점이 있으며, 심혈관 질환의 위험성을 높일 수 있는 것으로 알려져 있다. 다만 atazanavir 또는 boosted atazanavir는 심혈관 질환의 위험을 높이지 않는다는 연구 결과가 있으며[113], boosted darunavir는 아직까지 자료가 부족하다.

① Ritonavir-boosted darunavir (A-I)

Ritonavir-boosted darunavir는 현재 유통되고 있는 약물 중에 내성에 대한 저항성이 가장 높다는 장점이 있으나, 식사와 함께 복용해야

하는 불편함이 있다. ARTEMIS 연구는 초치료 환자에서 ritonavir-boosted darunavir와 ritonavir-boosted lopinavir의 효과를 비교한 것으로(두 약제 모두 tenofovir/emtricitabine과 병용) 48주에 시행한 분석에서 두 약물의 치료 효과는 서로 필적했으며, 192주에 시행한 분석에서는 ritonavir-boosted darunavir의 효과가 더 우수했다. 그리고 위장관 증상, 고지혈증 등을 포함한 부작용 빈도 면에서는 ritonavir-boosted darunavir 투여군에서 더 적었다[85, 114]. 위의 연구에서 순응도가 양호한 환자군에서는 양 군 간의 치료 효과가 큰 차이가 없었지만, 순응도가 떨어지는 환자에서는 ritonavir-boosted darunavir가 ritonavir-boosted lopinavir에 비해 바이러스 억제 효과가 현저히 우수했다[115].

Darunavir는 300 mg 제형과 400 mg 제형이 유통되는데, 초치료 환자 또는 darunavir 내성 돌연변이가 없는 환자에서는 darunavir 800 mg을 ritonavir 100 mg과 하루 1회 1번 복용하는 것이 표준 용량이다. 치명적인 간 손상이 보고된 바 있기 때문에 기존에 간질환이 있는 환자에게 투여할 때에는 특히 주의가 필요하다. 또한, darunavir는 sulfonamide moiety를 가지고 있기 때문에 sulfa allergy가 있는 사람에게 주의가 필요하다[116].

② Ritonavir-boosted atazanavir (A-I)

Ritonavir-boosted atazanavir는 치료 효과 면에서 우수하면서도, 다른 단백분해효소 억제제에 비해 위장관 부작용 및 대사적 합병증이 적다는 장점이 있다. 반면, 식사와 함께 복용해야 하기 때문에 번거로움, 위의 산도(acidity)를 떨어뜨리는 약물과 같이 사용할 경우 흡수가 저하될 수 있으며, 간접 고빌리루빈혈증 유발로 치료제 변경이 불가피한 경우가 간혹 있다는 단점이 있다. 간혹 요로결석이나 담도결석을 유발할 수 있다[117-120].

CASTLE 연구에서 ritonavir-boosted atazanavir 투여군과 ritonavir-boosted lopinavir 투여군을 비교했을 때(양 군 모두 tenofovir/emtricitabine을 뉴클레오시드 역전사효소 억제제 조합으로 함께 투여했음) 앞의 2가지 약물은 치료 효과 면에서 필적했으나, 치료 시작 전 CD4+ T 세포수 <50개/mm<sup>3</sup>이거나 HIV RNA ≥ 100,000 copies/mL일 경우 ritonavir-boosted atazanavir의 치료 효과가 더 우수한 경향이 있었다[84, 94]. 그러나 CASTLE 연구에서 인종별 소그룹으로 나눠서 분석한 결과 치료 효과가 인종에 따라 차이가 있었으며, 아시아 인종에서는 48주 치료 성공률이 ritonavir-boosted atazanavir 투여군(n=42)에서는 83%, ritonavir-boosted lopinavir 투여군(n=41)에서는 90%로 보고되었다(통계적으로 유의한 수준의 차이는 아니었음)[121]. 한편, 같은 연구에서 혈중 지질 상승이나 위장관 부작용은 ritonavir-boosted lopinavir를 투여 받은 군에서 더 두드러졌으며, 빌리루빈 상승은 ritonavir-boosted atazanavir 투여군에서 더 흔하게 관찰되었다[84, 94].

Ritonavir-boosted atazanavir, ritonavir-boosted darunavir, raltegravir를 투여한 군에서 치료 효과를 비교한 ACTG 5257 연구 96주 결과에서(세 약제 모두 tenofovir/emtricitabine과 병용), 3군 모두 비슷한 정도로 바이러스가 억제되었다. 그러나 bilirubin 상승, 위장관 등 부

작용으로 약제를 중단한 경우는 ritonavir-boosted atazanavir 투여군에서 더 많았다[122].

Atazanavir의 흡수는 위의 산도(gastric acidity)에 영향을 받으므로, 위의 산도를 떨어뜨리는 약물과 병용 투여 시에 주의가 필요하며, tenofovir에 의해 흡수가 저하된다는 점에도 주의해야 한다[123].

### ③ Ritonavir-boosted lopinavir (A-I)

Ritonavir-boosted lopinavir는 풍부한 임상적 경험이 축적되어 있다는 점이 장점이다. 또한, lopinavir와 저용량의 ritonavir가 복합된 형태로 유통되고 있기 때문에 따로 ritonavir를 복용하지 않아도 된다는 장점도 있다. 반면, 잦은 위장관 부작용, 고지혈증, 약제 수가 많은 점 등이 단점이다.

ACTG 5142 연구는 ritonavir-boosted lopinavir 투여군과 efavirenz 투여군을 비교한 연구로(양 군 모두 연구자가 개별 환자의 상황에 따라 선택한 2개의 뉴클레오시드 역전사효소 억제제를 병용했음), 바이러스 억제 정도는 efavirenz 투여군이 더 좋았지만, CD4+ T 세포수의 상승은 ritonavir-boosted lopinavir 투여군에서 더 높았다[124]. 한편, 같은 연구에서 지방위축(lipoatrophy)은 efavirenz를 투여한 군에서 더 흔하게 관찰되었다[125].

최근에는 ritonavir-boosted atazanavir 또는 ritonavir-boosted darunavir가 치료 효과 면에서 ritonavir-boosted lopinavir에 필적하거나 우월하며, 부작용 면에서는 ritonavir-boosted lopinavir에 비해 우수하다는 연구가 발표되었다[84, 85, 94, 114].

초치료 환자 및 치료력이 있는 환자에서 단백분해효소 억제제 계열 약물에 내성이 없다면 ritonavir-boosted lopinavir는 200 mg/50 mg 정제를 2정씩 하루 2번 복용하거나, 4정씩 하루 1번 복용할 수 있다[76, 126, 127]. 다만 단백분해효소 억제제 계열의 약물에 내성이 있거나 임신부의 경우에는 4정씩 하루 1번 복용하는 것은 치료 실패를 유발할 우려가 있으므로 피하는 것이 좋다(B-II). 특히 임신 말기에는 ritonavir-boosted lopinavir의 약물 농도가 현저히 떨어지므로 일부에서는 3정씩 하루 2번 복용하는 것을 추천하기도 한다(C-III).

한편, D:A:D 코호트 연구 및 ANRS 연구에 따르면 ritonavir-boosted lopinavir를 비롯한 단백분해효소 억제제 계열 약물을 복용한 환자에서 심근경색의 발생 위험이 높았으며[107, 109], D:A:D 연구에서 ritonavir-boosted lopinavir 투여군에서 신장 기능 손상이 더 많았다[128].

### ④ Unboosted atazanavir (B-I)

Unboosted atazanavir는 다른 단백분해효소 억제제 계열의 약물에 비해 위장관 부작용 및 대사적 합병증이 적다는 장점이 있다. 반면, 식사와 함께 복용해야 하기 때문에 번거로움, 위의 산도(gastric acidity)를 떨어뜨리는 약물과 같이 사용할 경우 흡수가 저하될 수 있으며, 간접 고빌리루빈혈증으로 치료제 변경이 불가피한 경우가 간혹 있다는 단점이 있다. Tenofovir, proton pump 억제제 등은 atazanavir의 혈중 농도 또는 흡수를 심각하게 저하시키기 때문에 상기 약물을 사

용해야 하는 경우에 unboosted atazanavir의 사용은 피해야 한다[123].

089 연구 48주 결과에서 unboosted atazanavir 투여군과 ritonavir-boosted atazanavir 투여군을 비교했을 때(양 군 모두 stavudine/lamivudine을 뉴클레오시드 역전사효소 억제제 조합으로 같이 투여했음), 치료 효과면에서 큰 차이가 없었다[129]. 한편, 2개의 관찰 코호트 연구에서 atazanavir가 포함된 치료를 받은 경우 ritonavir-boosted atazanavir가 포함된 경우에 비해 치료 효과가 떨어지는 것으로 보고하였다[130, 131].

5) 제 3의 약물로 비뉴클레오시드 역전사효소를 사용해야 하는 경우 어떤 약제를 선택해야 하는가? 각 약제들의 장단점 및 특징은?

4. 비뉴클레오시드 역전사효소 억제제는 efavirenz를 우선적으로 고려하며(A-I), efavirenz 투여가 곤란할 경우 rilpivirine을 고려할 수 있다(B-I).

(1) 비뉴클레오시드 역전사효소 억제제를 제 3의 약물(Table 1의 column B)로 사용할 경우 각 약물의 장단점 및 특징

비뉴클레오시드 역전사효소 억제제 계열의 약물은 단백분해효소 억제제 계열의 약물에 비해 대사 합병증의 유발 정도가 적고, 하루에 복용해야 할 약물의 개수가 적다는 장점이 있다. 하지만 내성 장벽이 낮아서 순응도가 떨어지면 쉽게 내성이 유발되는 단점이 있다. 또한, 비뉴클레오시드 역전사효소 억제제는 CYP3A4의 기질이, 유도 및 억제제(efavirenz)이기 때문에 다른 약물과 상호작용이 문제가 될 수 있다. 수직 감염 예방을 위해 nevirapine 단독 투여 경험이 있는 환자에서는 비뉴클레오시드 역전사효소 억제제가 포함된 고강도 항레트로바이러스요법은 피하는 것이 좋다[132] (A-I).

#### ① Efavirenz (A-I)

Efavirenz는 풍부한 임상 연구에서 그 효과가 인정된 약이라는 것이 가장 큰 장점이다[78-81, 86, 124, 133-138]. 그 외에도 하루에 1번만 복용해도 된다는 장점도 있다. 단점으로는 내성 장벽이 낮은 점, 약물 투여 초기에 중추신경계 부작용, 피부 발진 등이 종종 나타난다는 점 등을 들 수 있다. 한편, efavirenz는 태아 신경관 이상을 유발할 수 있기 때문에[25, 139], 향후 임신 가능성이 있는 여성에게는 피하는 것이 안전하다. 다만, 이미 efavirenz가 포함된 항바이러스 치료를 받으면서 바이러스가 잘 억제되는 임신부에서는 다음과 같은 이유에서 efavirenz를 유지하기도 한다. 첫째, 임신 도중 항바이러스제 변경 시 바이러스 억제가 안 되면서 수직감염을 유발할 우려가 있고, 둘째, 신경관 손상을 일으킬 수 있는 시기(임신 5-6주)에 대부분의 산모가 임신 사실을 모르고 지나가고 그 이후에나 임신 사실을 알게 되며, 셋째, efavirenz를 중단하거나 다른 약물로 바꿔서 억제가 되지 않을 경우 수직감염의 위험이 높아질 수 있으며, 넷째, 최근의 meta-analysis에 의하면 efavirenz 투여가 신경관 결손을 포함한 태아 기형을 높인다



는 증거가 없다[139, 140]. 한편, efavirenz를 투여 받는 환자는 다른 약제를 복용하는 군에 비해 자살 생각이나 시도가 높을 수 있으므로 주의해야 한다[141].

ACTG 5142 연구에서 efavirenz 투여군은 ritonavir-boosted lopinavir 투여군에 비해(양군 모두 연구자가 개별 환자의 상황에 따라 선택한 2개의 뉴클레오시드 역전사효소 억제제를 병용했음) 바이러스 억제는 더 잘 되었지만, CD4+ T 세포수 상승은 ritonavir-boosted lopinavir 투여군에서 더 높았다[124].

② Rilpivirine (A-I)

Rilpivirine은 기존의 1세대 비뉴클레오시드 역전사효소 억제제에 비해 부작용이 적고, 하루 1번만 복용해도 되며, 가장 흔히 발견되는 비뉴클레오시드 역전사효소 억제제 내성 돌연변이인 K103N이 있어도 항바이러스 효과가 있다는 장점이 있다[142]. 또한, 2015년 중으로 tenofovir/emtricitabine/rilpivirine 복합제가 국내에 유통될 예정으로 하루 1번 1알로 항바이러스 치료를 할 수 있는 장점도 있다. 그러나 치료 전 HIV RNA 정량치가 높은 환자에서 치료 효과가 떨어진다는 점, 충분한 양의 식사와 함께 복용해야 한다는 점, 약물 상호작용으로 rifabutin/rifampin/rifapentine과 같은 항결핵제 및 proton pump inhibitors와 같이 사용이 곤란하다는 점, HIV RNA >100,000 copies/mL인 환자에서 효과가 떨어질 수 있다는 점 등이 단점이다.

Rilpivirine 효과를 판정하기 위한 대규모 무작위 비교 임상 연구로는 ECHO 연구와 THRIVE 연구가 대표적이다. 위의 2가지 연구는 모두 tenofovir/emtricitabine을 NRTI backbone으로 했을 때 rilpivirine과 efavirenz의 효과를 비교한 것이다. 이들 연구에서 HIV RNA 100,000 copies/mL인 환자에서 두 약제의 효과는 비슷했으나, HIV RNA >100,000 copies/mL이거나, 혈중 CD4+ T 세포가 200개/mm<sup>3</sup> 미만인 경우에 rilpivirine이 포함된 항바이러스제를 투여 받는 환자는 efavirenz가 포함된 치료제를 투여받은 환자보다 치료 실패율이 높았다. 한편 중추신경계, 발진, 지질 이상 등의 부작용은 rilpivirine 투여군에서 적었다[86, 87, 137, 138, 143-147]. Rilpivirine과 efavirenz의 효과를 비교한 또 다른 연구인 STaR 연구(tenofovir/emtricitabine/rilpivirine 복합제 또는 tenofovir/emtricitabine/efavirenz를 투여함)에서 전반적으로 rilpivirine은 efavirenz와 효과면에서 필적했으며, HIV RNA 100,000 copies/mL인 환자에서는 rilpivirine 투여군에서 더 좋은 결과를 보였고, HIV RNA >500,000 copies/mL인 환자에서는 efavirenz의 효과가 더 좋았다[148].

6) 제 3의 약물로 통합효소 억제제를 사용할 경우 어떤 약제를 선택해야 하는가? 각 약제들의 장단점 및 특징은?

5. 통합효소 억제제를 사용할 경우에는 raltegravir 또는 cobicistat-boosted elvitegravir를 우선적으로 고려할 수 있다(A-I). Cobicistat-boosted elvitegravir는 tenofovir/emtricitabine/elvitegravir/cobicistat 복합제 형태로만 유통된다.

(1) 통합효소 억제제를 제 3의 약물(Table 1의 column B)로 사용할 경우 각 약물의 장단점 및 특징

통합효소 억제제는 비교적 최근에 개발된 약물로, 현재 우리나라에는 raltegravir와 elvitegravir(tenofovir/emtricitabine/elvitegravir/cobicistat 복합제형만 있음)가 유통되고 있다.

① Raltegravir (A-I)

Raltegravir는 혈중 지질 이상 등의 대사적 합병증을 거의 일으키지 않으며, 약물 상호작용이 비교적 적다는 장점이 있다. 하지만, 하루 2번 복용해야 한다는 단점이 있다. 내성에 대한 저항성은 1세대 비뉴클레오시드 역전사효소 억제제(efavirenz, nevirapine)보다는 우수하지만 단백질분해효소 억제제보다는 떨어진다.

STARTMRK 연구는 총 5년 간 raltegravir와 efavirenz를 비교한 연구로(두 약물 모두 tenofovir/emtricitabine을 뉴클레오시드 역전사효소 억제제 조합으로 병용 투여하였음), 최종적으로 항바이러스 효과 및 부작용 면에서 raltegravir가 efavirenz보다 우월했으며, 부작용도 더 적었다[78-81, 149].

Raltegravir, ritonavir-boosted atazanavir, ritonavir-boosted darunavir의 치료 효과를 비교한 ACTG 5257 연구 96주 결과에서(세 약제 모두 tenofovir/emtricitabine과 병용), 3군 모두 비슷한 정도로 바이러스가 억제되었다. 다만, raltegravir 투여군에 비해 ritonavir-boosted atazanavir 및 ritonavir-boosted darunavir를 투여한 군에서 골밀도 감소가 더 현저했으며, 부작용으로 약제를 중단한 빈도는 ritonavir-boosted atazanavir 투여군에서 더 많았다[122].

Raltegravir는 초치료 환자에서 뉴클레오시드 역전사효소 억제제 비포함약제 조합-용법(NRTI sparing regimen)으로도 연구된 바가 있는데, 대표적인 것이 PROGRESS 연구이다. 상기 연구에서는 raltegravir + ritonavir-boosted lopinavir의 치료 효과를 tenofovir/emtricitabine + ritonavir-boosted lopinavir와 비교했다. 96주째까지의 치료 성적에서, 2가지 약제 조합의 치료 효과는 비슷했다[150]. 다만 골밀도 감소는 tenofovir/emtricitabine + ritonavir-boosted lopinavir를 투여한 군에서 현저했다. 한편, raltegravir + ritonavir-boosted darunavir 투여군과 tenofovir/emtricitabine + ritonavir boosted darunavir 투여군을 비교한 연구에서는 raltegravir + ritonavir-boosted darunavir 투여군에서 치료 효과가 떨어졌다[151].

② Cobicistat-boosted elvitegravir (A-I)

Cobicistat-boosted elvitegravir는 tenofovir/emtricitabine/elvitegravir/cobicistat 복합제 형태로만 유통된다. 하루 1번 1알로 항바이러스 치료를 할 수 있다는 장점이 있다. 반면, 식사와 함께 먹어야 한다는 단점이 있다. 또한, elvitegravir는 raltegravir와는 달리 CYP3A 효소에 의해 주로 대사되는데, 이로 인해 약물 상호작용이 빈번하기 때문에 주의가 필요하다. 특히, rifabutin/rifampin/rifapentine과 같은 항결핵제와 같이 투여할 수 없다는 점에 유념해야 한다. Tenofovir/emtricitabine/elvitegravir/cobicistat 복합제는 creatinine clearance <70 mL/

min인 사람에게 투여는 피해야 하며, 투여 전에 비해 혈중 creatinine 이 0.4 mg/dL 이상 상승할 때에는 근위 신세뇨관 손상의 가능성을 염두에 두고 주의해야 한다[152].

Tenofovir/emtricitabine/elvitegravir/cobicistat과 tenofovir/emtricitabine/efavirenz의 효과를 비교한 연구(102 연구), tenofovir/emtricitabine/elvitegravir/cobicistat과 tenofovir/emtricitabine + ritonavir-boosted atazanavir의 효과를 비교한 연구(103 연구)의 144주째 분석 결과 모두에서 tenofovir/emtricitabine/elvitegravir/cobicistat은 비교 약물에 필적한 항바이러스 효과를 보였다[153, 154].

Cobicistat은 CYP3A 효소 억제제로 자체로 항바이러스 효과가 있는 약물은 아니며, elvitegravir 대사를 억제하여 elvitegravir의 혈중 농도를 높이는 역할을 한다. Cobicistat은 근위 신세뇨관에서 creatinine 배출에 관여하는 MATE1 transporter를 가역적으로 억제한다. 이와 같은 이유로 cobicistat은 GFR과 무관하게 creatinine clearance를 감소시킨다[152].

7) 고강도 항레트로바이러스요법에서 피해야 할 약제 조합은?

(1) 뉴클레오시드 역전사효소 억제제만으로 구성된 치료제 조합 다른 계열의 약물과 병합하지 않고 뉴클레오시드 역전사효소 억제제 1-4제만을 투여하는 것은 항바이러스 효과가 떨어질 우려가 있고 자료도 부족하므로 피하는 것이 좋다.

(2) 2개의 비뉴클레오시드 역전사효소 억제제 조합

Efavirenz와 nevirapine을 같이 투여할 경우 부작용이 자주 나타난다. Etravirine을 다른 비뉴클레오시드 역전사효소 억제제와 같이 투여할 경우 etravirine의 혈중 농도가 감소한다. 따라서 2개의 비뉴클레오시드 역전사효소 억제제를 동시에 투여하는 것은 피해야 한다.

(3) 가임기 여성에서 efavirenz 투여

Efavirenz는 유인원과 사람에서 신경과 결손을 유발한다는 보고가 있으므로 피임을 하지 않는 가임기 여성에서 efavirenz는 피하는 것이 안전하며, 임신 초반(1st trimester)에 특히 주의해야 한다. 다만, 신경관 결손의 위험이 높은 임신 5-6주에는 대부분의 임신부가 임신 사실을 모르고 지나가고, 최근 분석에 따르면 efavirenz에 의한 신경관 결손의 빈도가 우려할 정도의 수준은 아닌 것으로 확인되었기 때문에, efavirenz 투여 받고 바이러스가 잘 억제되는 임신부에서는 이득과 손실을 따져봐서 efavirenz를 유지할 수도 있다.

(4) didanosine + tenofovir

치료 실패율이 높고, 내성 바이러스가 잘 출현하며 면역학적 치료 실패 우려가 높다. 또한, didanosine의 부작용이 증강될 수 있다.

(5) Emtricitabine + lamivudine

Emtricitabine과 lamivudine은 모두 cytidine 유사체로 내성 양상이 유사하고, 같이 사용했을 경우 추가적인 항바이러스 효과를 거의 기

대할 수 없으므로 병용 투여를 피해야 한다.

(6) Etravirine + unboosted protease inhibitor

Etravirine은 unboosted PI의 혈중 농도를 심각하게 떨어뜨릴 수 있다. 따라서 etravirine과 unboosted PI를 동시에 투여하는 것은 바람직하지 않다.

(7) Etravirine + ritonavir-boosted atazanavir

Etravirine은 ritonavir-boosted atazanavir의 혈중 농도를 심각하게 떨어뜨릴 수 있다. 따라서 etravirine과 ritonavir-boosted atazanavir를 동시에 투여하는 것은 바람직하지 않다.

(8) CD4+ T cell >250 cells/mm<sup>3</sup>인 여성 또는 CD4+ T cell >400 cells/mm<sup>3</sup>인 남성에게 초치료제로 nevirapine 투여

치명적인 간기능 이상을 유발할 수 있기 때문에 가급적 피하는 것이 좋으며, 만일 꼭 투여해야 하는 경우라면 충분히 주의를 기울여야 한다.

(9) Unboosted Darunavir

Unboosted darunavir의 치료 효과에 대한 연구는 진행된 바 없으며, 혈중 농도가 심각하게 저하될 수 있다. 따라서 darunavir를 투여할 경우에는 반드시 저용량의 ritonavir와 함께 투여해야 한다.

#### 4. 치료력이 있는 환자에서 항레트로바이러스제 투여

- 항레트로바이러스제 투여 중이고 바이러스가 억제되어 있으면 주기적으로 바이러스 억제 여부를 확인하는 것이 필요하다. 가능하면 부작용이 적고 간편하게 투여할 수 있도록 약제를 변경한다(A-III).
- 항레트로바이러스제 투여 24주 후에 바이러스 역가를 400 copies/mL 미만, 48주 후에 50 copies/mL 미만으로 유지하는 것이 바람직하다. 지속적으로 낮은 정도의 바이러스혈증(50-200 copies/mL)이 발견되어도 바이러스 억제실패로 보고 치료제를 변경할 필요는 없다(A-III).
- 항레트로바이러스제 투여 중 바이러스 억제실패에 이르면 약제내성검사를 시행하는 것을 추천한다(A-I). 약제내성검사는 가능하면 약제 투여 중(A-I) 혹은 약제 중단 4주 이내에 시행하는 것이 바람직하다(A-II). 약제 중단 이후 4주 이상 경과되었더라도 약제내성검사 시행을 추천하며 이때에는 내성변이가 있어도 발견되지 않을 수 있음을 고려하여 판단한다(C-III).
- 항레트로바이러스제 투여 중 바이러스 억제실패에 이른 환자에서 치료목표는 다시 바이러스를 최대한 억제(바이러스 역가 <50 copies/mL)하는 것이다(A-I).
- 항레트로바이러스제 투여 중 바이러스 억제실패에 이르면 항레트로바이러스제 사용력과 약제내성검사 결과를 토대로 새

로운 약제를 선정한다(A-II). 바이러스 억제실패에 이른 환자의 치료에는 적어도 2가지 이상, 가능하면 3가지의 효과적인 항레트로바이러스제를 추가하는 것을 추천한다(A-I).

6. 바이러스는 효과적으로 억제되는데 CD4+ T 세포수 증가가 적절하지 않을 때 면역기능개선 실패를 고려해야 하는데 면역기능개선 실패의 정의, 치료에 대해서는 아직 적절한 지침이 없다.

7. 바이러스 억제실패에 이른 환자이나 바이러스를 최대한 억제하는 것이 불가능한 경우에도 CD4+ T세포 수 감소를 막고 임상적 악화를 막기 위해 부작용을 최소화한 항레트로바이러스제 투여를 유지할 것을 추천한다(A-I).

항레트로바이러스제 투여 중 바이러스가 억제되어 있으면 주기적으로 바이러스 억제여부를 확인하는 것을 추천한다. 바이러스 억제가 지속적으로 되고 있는 환자에서도 가능하면 부작용이 적고 간편하게 투여할 수 있도록 약제를 변경하는 것을 추천한다. 가능하면 두 가지 이상의 약제를 합쳐놓은 복합제(coformulation)를 투여하는 것이 적절하다[155, 156].

**핵심질문:**

항레트로바이러스 치료 중 바이러스 억제실패에 이른 환자를 어떻게 치료할 것인가?  
 항레트로바이러스 치료 중 면역기능개선실패를 보인 환자를 어떻게 치료할 것인가?

1) 항레트로바이러스제 치료실패

항레트로바이러스제 치료실패라 함은 치료제에 대한 반응이 적절하지 않음을 뜻한다. 항레트로바이러스제를 투여하였을 때 기대하는 적절한 반응은 바이러스 역가가 검사실에서 찾을 수 있는 한계(50 copies/mL) 미만으로 지속적으로 억제되는 것이다.

치료실패는 바이러스 억제실패, 면역기능개선실패, 임상적 악화를 초래하게 된다. 치료실패와 연관 있는 요인들에는 ① 치료 시작 시 높은 바이러스 역가, ② 치료 시작 시 낮은 CD4+ T 세포수, ③ 치료시작 전에 에이즈가 발생한 경우, ④ 동반질환이 있는 경우(우울증, 약물중독), ⑤ 약제내성바이러스에 감염된 경우, ⑥ 약제 순응도가 떨어지는 경우, ⑦ 약물부작용이나 독성이 있는 경우, ⑧ 약물상호작용 등으로 약물농도가 떨어지는 경우 등이 알려져 있다.

항레트로바이러스제 치료실패를 보인 환자에서는 여러 가지 원인이 있을 수 있으므로 다음 사항들을 파악할 것을 추천한다. ① 바이러스 역가와 CD4+ T 세포수의 변화, ② 항레트로바이러스제 투여력, ③ 이전의 내성검사결과, ④ 약제순응도, ⑤ 약제부작용 여부, ⑥ 함께 투여하는 약제들, ⑦ 동반된 다른 질환. 만약 약제순응도가 떨어지는 경우라면 이유를 파악하는 것이 필요하며, 가능하면 약제를 단순화하여 투여 약제 수를 줄이는 것을 추천한다[155](A-III).

순응도가 떨어지는 환자에서는 이유가 무엇인지 밝히는 것이 필요하다. 흔히 고려할 수 있는 이유로는 약제 부작용으로 인한 불편감, 우

울증, 복잡한 약제 투여법 등이 있다. 약제의 부작용으로 인해 순응도가 떨어진 경우에는 약제 부작용이 얼마나 심한지, 얼마나 오랫동안 지속되는지 파악하는 것이 필요하다. 약제내성이 발견되지 않았으나 약제 부작용으로 순응도가 떨어진 경우에는 부작용으로 인한 증상을 완화시키는 약제투여(예컨대 지사제의 투여), 같은 계열 내에서 다른 약제로 변경(예컨대 zidovudine으로 인한 빈혈이 문제인 경우 abacavir로 변경), 다른 계열의 약제로 변경하는 방법 등을 고려한다.

음식 혹은 다른 약물로 인해 항레트로바이러스제 농도가 낮아지는 경우가 있다. 약제마다 음식과 함께 복용하는 것을 추천하는지, 공복에 투여하는 것을 추천하는지가 다르기 때문에 추천사항을 확인하고 환자가 약제투여를 추천대로 하고 있는지 파악한다. 다른 약제를 함께 투여하는 경우에는 항레트로바이러스제와 약물상호작용을 일으키는지 확인한다. 항레트로바이러스제 투여 중 바이러스 억제실패에 이르면 약제내성검사를 시행하는 것을 추천한다(A-I). 약제내성검사는 가능하면 약제 투여 중(A-I) 혹은 약제 중단 4주 이내에 시행하는 것이 바람직하다(A-II). 약제 중단 이후 4주 이상 경과되었다라도 약제내성검사 시행을 추천하며 이때에는 내성변이가 있어도 발견되지 않을 수 있음을 고려하여 판단한다(C-III).

2) 항레트로바이러스제 치료 실패에 대한 조치

(1) 바이러스 억제 실패

항레트로바이러스제 투여의 목표는 지속적으로 바이러스 역가를 측정한계(50 copies/mL) 미만으로 유지하는 것이다. 바이러스 억제 실패라 함은 항레트로바이러스제 투여에도 불구하고 바이러스 역가를 200 copies/mL 미만으로 유지할 수 없는 경우를 뜻한다. 항레트로바이러스제 투여 중 바이러스 역가가 50-200 copies/mL인 경우 어떻게 대처할 것인가에 대해서는 논란이 있다. 일부 연구에서는 바이러스 역가가 50-200 copies/mL이더라도 임상적 의미가 없다는 결과를 보인 반면[157], 다른 연구에서는 추후 바이러스 억제 실패와 연관 있다는 결과를 보였기 때문이다[158, 159]. 바이러스 역가가 한 번 51-1,000 copies/mL로 상승하였다가 다시 감소하는 경우는 치료실패의 지표로 판단하지 않는다[160].

항레트로바이러스제 투여 중 바이러스 억제실패에 이른 환자에서 치료제 사용력과 약제내성 검사 결과를 토대로 새로운 약제를 선정하는 것을 추천한다(A-II). 바이러스 억제 실패에 이른 환자의 치료에는 적어도 2가지 이상, 가능하면 3가지의 효과적인 항레트로바이러스제를 추가하는 것을 추천한다[161-165](A-I). 같은 계열 약제 사이에는 교차내성이 가능하며 새로운 계열의 약제는 효과적인 항레트로바이러스제로 간주한다. 새로운 약제에는 비뉴클레오시드 역전사 효소 억제제 내성 바이러스에도 효과를 보일 수 있는 etravirine, 단백분해효소 억제제 내성 바이러스에도 효과를 보일 수 있는 darunavir, 통합효소 억제제인 raltegravir, elvitegravir, CCR5 억제제인 maraviroc, 융합 억제제인 enfuvirtide가 포함된다.

치료력이 있고 바이러스 역가가 50-1,000 copies/mL인 경우: 약물 순응도를 파악하는 것이 필요하다. 일시적으로 바이러스 역가가 증

가하였다가 다시 50 copies/mL 미만으로 억제되는 경우는 치료실패로 간주하지 않는다. 바이러스 역가가 50-200 copies/mL인 경우 치료법은 잘 정립되지 않았으나 내성발현의 위험이 낮기 때문에 치료약제를 유지하면서 3개월 간격으로 바이러스 역가 측정하는 것을 추천한다(A-III). 바이러스 역가가 200-1,000 copies/mL인 경우, 특히 500 copies/mL을 초과한 경우에는 약제내성검사를 시행하고 항레트로바이러스제 변경을 고려한다(B-III).

치료력이 있고 바이러스 역가가 1,000 copies/mL 이상이지만 내성돌연변이가 발견되지 않은 경우: 약물순응도를 파악한다. 환자가 항레트로바이러스제를 4주 이상 중단한 것은 아닌지 확인한다. 항레트로바이러스제를 중단한 상태라면 다시 같은 약제 혹은 새로운 조합의 약제를 시작하고 2-4주 후에 유전형 내성 검사(genotypic resistance test)를 시행한다(C-III).

치료력이 있고 내성돌연변이가 발견된 경우: 치료의 목표는 다시 바이러스 역가를 50 copies/mL 미만으로 유지하는 것이다. 바이러스 억제실패로 판단한 경우에는 가능한 서둘러 항레트로바이러스제를 변경하는 것을 추천한다. 특히 비뉴클레오시드 역전사효소 억제제를 사용 중이었다면 내성돌연변이가 추가적으로 생기는 것을 막기 위해 비뉴클레오시드 역전사효소 억제제를 중단하는 것이 필요하다. 왜냐하면 efavirenz를 포함한 항레트로바이러스제 투여 중 efavirenz 내성돌연변이가 있는 상태에서 바이러스 억제실패를 보일 때 efavirenz를 유지하면 추가적인 내성돌연변이가 생겨서 etravirine과 같은 새로운 비뉴클레오시드 역전사효소 억제제에도 안 들을 수 있기 때문이다. 마찬가지로 치료실패를 보일 때 raltegravir, elvitegravir, enfuvirtide를 지속적으로 투여하는 것은 추천하지 않는다. 내성돌연변이가 있고 치료실패에 이른 경우에는 적어도 2가지 이상, 가능하면 3가지의 효과적인 항레트로바이러스제를 추가하는 것을 추천한다(A-II). 바이러스 억제실패환자에서 새로운 항레트로바이러스제 조합을 고려할 때 중요한 것은 효과적인 항레트로바이러스제의 개수이고 종류는 상대적으로 덜 중요하다. 두 개 이상의 효과적인 항레트로바이러스제 조합이 가능한 경우 비뉴클레오시드 역전사효소 억제제를 추가하는 것은 추가적인 이득이 없다[166].

장기간 치료력이 있고 내성돌연변이가 발견된 경우: 치료의 목표는 다시 바이러스 역가를 50 copies/mL 미만으로 억제하는 것이다. 하지만 2가지 이상의 효과적인 항레트로바이러스제로 새로운 조합을 만들 수 없는 환자에서는 이러한 목표를 달성할 수 없게 된다. 이 경우 치료의 목표는 바이러스를 최대한 억제해서 면역기능저하를 최소화하고 임상적으로 악화되는 것을 막는 것이다. 바이러스 역가를 치료 전에 비해 0.5 log<sub>10</sub>copies/mL 이상 억제하면 임상적으로 이득이 있다는 보고가 있다[167]. 2가지 이상의 효과적인 항레트로바이러스제로 새로운 조합을 만들 수 없을 때 가장 적절한 약제선택에 대한 공통된 견해는 없으나 약제를 변경하는 것보다는 약제를 유지하는 것이 더 적절하다. 바이러스 억제에 실패하더라도 바이러스 역가를 지속적으로 10,000-20,000 copies/mL 미만으로 유지하면 면역학적 혹은 임상적으로 이득이 될 수 있다[168, 169]. 치료실패한 약제들

에 효과적인 새로운 약제 한 가지만 추가하는 것은 추천하지 않는다(B-II). 하지만 치료실패 상태이고 CD4+ T 세포수가 100개/mm<sup>3</sup> 미만이고 임상적인 악화가 우려될 때에는 단기기간이나 임상적인 악화를 막기 위해 효과적인 새로운 약제 한 가지만 추가할 수 있다(C-I). 새로운 약제 한 가지만 추가하는 것을 고려할 때에는 이득과 손해를 저울질해야 하며 사람면역결핍바이러스 감염 전문가에게 자문하는 것을 추천한다.

### (2) 면역기능개선실패

면역기능개선실패의 정확한 정의는 없으나 항레트로바이러스제 투여 4-7년 후 CD4+ T 세포수가 350-500/mm<sup>3</sup>을 초과하지 못한 경우를 정의로 사용한 연구들이 있다[170]. 면역기능개선실패 분율은 치료 전 CD4+ T 세포수와 관찰기간에 따라 차이가 생긴다. 6년을 관찰한 연구에서 약제투여 전 CD4+ T 세포수가 200개/mm<sup>3</sup> 미만이었던 환자들 중 42%에서 CD4+ T 세포수가 500개/mm<sup>3</sup>를 초과하였다. 반면 약제투여 전 CD4+ T 세포수가 200-350개/mm<sup>3</sup>였던 경우에는 66%가, 350개/mm<sup>3</sup>를 초과한 경우에는 85%가 CD4+ T 세포수 500개/mm<sup>3</sup>을 초과하였다[171]. 항레트로바이러스제를 투여하여 바이러스가 억제되면 CD4+ T 세포수는 증가하다가 4-6년 후부터는 비슷한 정도에 머무르게 된다[172, 173].

항레트로바이러스제를 투여한 후 바이러스는 억제되는데 CD4+ T 세포수가 지속적으로 낮게 유지되는 경우가 있다. 이 경우 에이즈의 발생 위험은 크지 않지만 여전히 남아 있다[174]. 또 심혈관질환, 간질환, 신질환 발생률 역시 증가하게 된다[175].

항레트로바이러스제를 투여하였을 때 CD4+ T 세포수 반응이 나쁠 것을 예측할 수 있는 인자로는 ① 항레트로바이러스제 투여 전 CD4+ T 세포수 <200개/mm<sup>3</sup>, ② 고령, ③ HIV-2, HTLV-1, HTLV-2, HCV와 동시 감염된 경우, ④ zidovudine 혹은 tenofovir + didanosine을 투여 받는 경우, ⑤ 다른 약제를 투여 받는 경우, ⑥ 면역기능의 심각한 손상으로 재건이 되지 않는 경우들이 알려져 있다.

면역기능개선실패 환자에서는 동시에 투여하고 있는 약제들을 먼저 확인할 필요가 있다. 특히 백혈구수를 감소시킬 수 있는 약제인 interferon, 항암제, 스테로이드, zidovudine, tenofovir + didanosine을 투여 받고 있는지 알아보아야 한다. 만약 이러한 약제를 투여 받고 있다면 약제를 중단하거나 다른 약제로 변경하는 것을 추천한다. HCV, HTLV-1, HTLV-2 등의 동시감염여부를 파악해야 하고 동반한 악성종양이 있는지도 검토가 필요하다. 바이러스는 억제되고 있으나 CD4+ T 세포수가 지속적으로 200개/mm<sup>3</sup> 미만인 환자에서 적절한 조치가 무엇인가는 아직 정립되지 않았다. Interleukin-2를 투여하는 치료법은 효과가 입증되지 않아 추천하지 않는다(A-I).

### (3) 임상적 악화

임상적 악화라 함은 항레트로바이러스제 투여 3개월 이후 면역재건증후군(immune reconstitution syndrome)으로 판단할 수 없는 사람면역결핍바이러스 감염증과 연관된 문제가 발생한 것을 뜻한다.

이전의 연구에서 바이러스가 억제되고 있는 상태에서도 2.5년간 관찰하였을 때 7%의 환자에서 에이즈 혹은 사망이 발생한 바 있으며, 바이러스가 억제되지 않은 경우에는 20%에서 에이즈 혹은 사망이 발생하였다[176]. 항레트로바이러스제 투여 3개월 이내에 새로운 증상과 징후가 생기면 먼저 면역재건증후군의 가능성을 고려한다. 바이러스는 억제되어 있고 면역재건증후군이 아닌 새로운 임상상이 발생하였다고 해서 항레트로바이러스제를 변경해야 하는 것은 아니다(B-III).

## 5. HIV/HBV 및 HIV/HCV 동시감염 환자치료

### 1) 서론

#### (1) 배경

사람면역결핍바이러스감염자는 감염경로가 비슷한 B형간염바이러스(hepatitis B virus; HBV)나 C형간염바이러스(hepatitis C virus; HCV)에 동시 감염되기 쉽다. HIV와 HBV/HCV의 동시 감염은 각 바이러스 질환의 자연경과에 영향을 미치며 항레트로바이러스제 치료(antiretroviral therapy; ART) 시 약물관련 간독성과 같은 부작용을 초래할 수 있고 간질환에 의한 질병률 및 사망률을 높인다. HIV와 HBV/HCV 동시 감염 치료 시 약물내성, 교차내성, 간독성, 최적하반응(suboptimal response) 등 고려해야 할 점이 많으므로 주의를 요한다.

#### (2) 범위

본 지침 내용은 HIV와 HBV 또한 HIV와 HCV 동시 감염 환자에서의 항레트로바이러스제 치료 및 HBV와 HCV의 진단, 예방 및 치료에 대한 내용을 다루고 있다. 단, 국내에서 현재 인가되지 않은 boseprevir나 telaprevir에 대한 내용은 다루지 않았다.

#### (3) 문헌 검색

본 분야의 진료 지침 작성을 위하여 미국 DHHS guideline (2014), European AIDS clinical society (EACS, 2014)를 참조하였으며, 대한간학회에서 출간한 2011 만성 B형간염 가이드라인(2011.12 개정), 대한간학회 C형간염 치료 가이드라인(2013개정)을 참고하였다. PubMed (www.pubmed.gov) 검색 엔진을 사용하여 1995년 1월부터 2014년 10월까지의 기간 동안 국외에서 출판된 문헌들을 검색하였다. 국내 문헌은 동일한 기간 동안 KoreaMed (http://www.koreamed.org)와 한국학술정보(http://Kiss.kstudy.com)을 사용하여 검색하였다. 검색어로는 HIV에 대해서는 ‘HIV’ 또는 ‘Human immunodeficiency virus’, HBV에 대해서는 ‘HBV’ 또는 ‘hepatitis B virus’, HCV에 대해서는 ‘HCV’ 또는 ‘hepatitis C virus’, 치료에 대한 검색어로는 ‘therapy’ 또는 ‘treatment’ 또는 ‘management’를 사용하였다.

#### (4) 핵심질문요약

##### ① HIV와 HBV의 동시감염

- HIV 감염자에서 HBV 감염여부는 어떻게 선별 검사해야 하며

간염에 대한 예방은 어떻게 해야 하는가?

- HIV/HBV 동시감염 환자에서 치료 전 평가는 어떻게 해야 하는가?
- HIV/HBV 동시 감염 환자에서 치료시작시점은?
- HIV/HBV 동시 감염 환자에서 치료제의 선택은 어떻게 해야 하는가?
- HIV/HBV 동시 감염 환자에서 항 HBV 효과를 갖는 약제(예, lamivudine, entecavir)를 중단해야 할 경우 유의할 점은?
- HIV/HBV 동시 감염 환자에서 HIV치료 실패로 항레트로바이러스 약제를 교체해야 할 경우 유의할 점은?

##### ② HIV와 HCV의 동시감염

- HIV 감염자에서 HCV감염여부는 어떻게 선별 검사해야 하며 바이러스간염에 대한 예방은 어떻게 해야 하는가?
- HIV/HCV 동시감염 환자에서 치료 전 평가는 어떻게 해야 하는가?
- 치료 경험이 없는 HIV/HCV 동시 감염환자에서 언제 고강도 항레트로바이러스요법을 시작하는가?
- HIV/HCV 동시 감염 환자에서 어떠한 약제를 사용해야 하는가?
- HIV/HCV 동시 감염 환자의 치료는 어떻게 해야 하는가?

##### 2) HIV 감염자에서 HBV 감염여부는 어떻게 선별 검사해야 하며 바이러스간염에 대한 예방은 어떻게 해야 하는가?

1. 모든 HIV감염자는 HBV 감염 여부를 확인할 수 있는 선별검사를 해야 한다(A-III).
2. 모든 HIV감염자는 A형 간염과 B형 간염 바이러스에 대한 항체 검사를 해야 하며, anti-HBsAb가 없는 경우는 B형간염 예방접종을, anti-HAV IgG가 없는 경우는 A형 간염 예방접종을 시행한다(A-III).
3. B형간염 예방접종 후 1달 후 anti-HBs를 검사하고, 항체 미형성자(anti-HBs <10 IU/mL)의 경우 재접종을 시행한다(B-III). 항체 미형성자의 경우 매년 HBV감염 여부를 확인할 수 있는 선별 검사를 시행한다(B-III).

##### (1) 사람면역결핍바이러스와 HBV 감염의 상호 작용

사람면역결핍바이러스 감염자에서 만성 B형 간염이 동반되어 있는 경우 간경화, 말기간질환, 간암으로의 진행이 더 빠르다[58]. 반면 만성 B형 간염 바이러스 감염 자체는 HIV 감염의 진행경과나 고강도 항레트로바이러스요법 이후 사람면역결핍바이러스의 억제 정도나 CD4+ T 세포반응에 영향을 미치지 않는다[177, 178]. HIV/HBV 동시 감염을 치료할 때에는 HBV의 재활성화, 약물내성, 약물 유발 간독성 등 여러 가지 요소를 고려해야 한다.

(2) HIV 감염자에서 HBV 감염 여부는 어떻게 선별 검사해야 하며 바이러스간염에 대한 예방은 어떻게 해야 하는가?

모든 사람면역결핍바이러스 감염자에서 HBV에 대한 선별검사를 시행하며, 혈청 HBsAg, 총 anti-HBc, anti-HBs를 측정한다. HBsAg이 6개월 간격으로 2차례 이상 양성인 경우 만성 HBV 감염자라고 정의하며, 혈청 HBeAg, anti-HBe, HBV DNA 검사를 시행하여 HBV 감염의 활성유무를 판단한다. 모든 사람면역결핍바이러스 감염자에서 A형 간염에 대한 항체 보유 여부를 판단하기 위해 anti-HAV를 시행한다. Anti-HBs가 없는 경우는 B형간염 예방접종을, anti-HAV IgG가 없는 경우는 A형 간염 예방접종을 시행한다. B형간염 예방접종 후 항체 미형성자(anti-HBs <10 IU/mL)의 경우 재접종을 시행한다. 예방 접종 완료 1달 후 검사에서 anti-HBsAb <0 IU/mL인 무반응자의 경우 매년 HBV감염 여부를 확인할 수 있는 선별 검사를 시행한다. 낮은 CD4 T 세포수를 갖는 환자의 경우 HBV 예방접종을 통한 항체형성이 잘 일어나지 않으므로 HBV 예방접종은 CD4+ T 세포수가 350개 미만으로 떨어지기 전에 시행한다(A-II). 단, 낮은 CD4+ T 세포수를 갖는 환자의 경우 CD4 T+ 세포수가 350개 이상으로 회복될 때까지 HBV 예방접종을 미루지 않는다(A-II).

(3) HIV/HBV 동시 감염자에서의 일반적인 권고사항

모든 HIV/HBV 동시 감염자에게 금주를 권고하도록 하며, HBV 전파를 예방하기 위한 방법을 알려주어야 한다.

3) HIV/HBV 동시감염자에서 치료 전 평가는 어떻게 해야 하는가?

4. 모든 HBsAg 양성 사람면역결핍바이러스감염인의 경우 항레트로바이러스 치료 전 HBV DNA의 양적인 평가가 이루어져야 한다(A-III).

고강도 항레트로바이러스 요법 시작 전 HBsAg 양성인 모든 HIV 감염자는 HBV DNA 정량검사를 시행한다(A-III). HIV/HBV 동시감염자에서는 치료 전 HBV 질환의 중증도를 평가해야 한다. 만성 HBV 감염이 진단된 경우, CBC, ALT, AST, albumin, bilirubin, prothrombin time을 측정하고 매 6개월마다 재측정하여 질환의 중증도와 간질환의 진행여부를 판단한다(A-I). HBV 증식 표지자로 HBeAg, anti-HBe, 혈청 HBV DNA 정량검사를 시행한다(A-I). 만성 B형 간염 환자는 간세포암종(Hepatocellular carcinoma; HCC)에 대한 선별검사가 필요하며, 정기적인 감시검사가 필요하다. 표준적인 간세포암종 선별검사 방법은 혈청알파태아단백과 복부 초음파검사이다(A-I).

혈청 HBV DNA가 양성(>2,000 IU/mL)이면서 ALT가 상승된 만성 B형 간염환자는 선택적으로 간조직검사를 통해 염증괴사 정도 및 섬유화 정도를 관찰하여 치료시작을 결정하는데 도움을 받을 수 있다. 하지만 간조직검사는 침습적인 검사방법이고 간의 작은 일부분만을 채취하여 관찰한다는 단점과 함께 관찰자들의 간과 관찰자 내 일치도에도 제한이 있어 임상에서 적극적으로 이용하기에는 한계가 있다.

HBV에 효과적인 고강도 항레트로바이러스요법을 이미 받고 있는 만성 B형 바이러스 감염환자의 경우 HBV DNA를 매 6-12개월마다

정량검사로 확인하여 HBV 치료 효과를 추적 관찰한다.

4) HIV/HBV 동시 감염 환자에서 치료시작시점은?

5. CD4+ T 세포수와 무관하게 모든 HIV/HBV 동시 감염 환자는 HIV와 HBV 모두 치료할 수 있는 항레트로바이러스제 조합으로 치료를 하는 것이 권장된다(A-II).

CD4+ T 세포수와 무관하게 모든 HIV/HBV 동시 감염 환자는 HIV와 HBV 모두 치료할 수 있는 항레트로바이러스제 조합으로 치료를 하는 것이 권장된다(A-II). 단, ART를 거부하는 경우 HBV 단독 치료를 pegylated interferon  $\alpha$ 를 48주 투약하거나 adefovir를 투약해 볼 수 있다(C-III).

HBV의 치료가 필요한 경우는 아래와 같다.

- (1) HBeAg 양성이며 지속적으로 정상 ALT수치를 보이는 면역 반응기의 HBV 보유자는 치료대상이 되지 않는다(B-I).
- (2) HBeAg 양성 만성간염의 경우 혈청 HBV DNA가 20,000 IU/mL 이상이며 ALT가 정상 상한치의 1-2배인 경우 치료 결정을 위해서 간생검을 고려할 수 있다(B-II). 간 생검 결과 중등도 이상의 염증 괴사 소견이나 문맥주변부 섬유화 이상의 단계를 보이는 경우 치료를 권장한다(A-I).
- (3) HBeAg 음성 만성 간염의 경우 혈청 HBV DNA가 2,000 IU/mL 이상이며 ALT가 정상 상한치의 2배 이상인 경우 치료의 적응이 된다(A-I). ALT가 정상 상한치의 2배 미만인 경우 치료 결정을 위해서 간생검을 고려할 수 있다(B-II). 간생검 결과 중등도 이상의 염증괴사 소견이나 문맥주변부 섬유화 이상의 단계를 보이는 경우 치료를 권장한다(A-I).
- (4) 대상성 간경변증의 경우 혈청 HBV DNA가 2,000 IU/mL 이상이면 ALT 값에 관계 없이 치료를 권장한다(B-I).
- (5) 비대대상성 간경변의 경우 혈청 HBV DNA가 양성이면 ALT 값에 관계 없이 치료를 권장하며 간이식을 고려한다(B-I).

5) HIV/HBV 동시 감염 환자에서 치료제의 선택은 어떻게 해야 하는가?

6. HIV/HBV 동시 감염의 치료: Emtricitabine (FTC), Lamivudine (3TC), Tenofovir (TDF)는 HIV와 HBV 모두에 치료효과가 있으므로, HBV나 HIV 중 한 가지만 치료가 필요한 경우 TDF + FTC 나 TDF+3TC 조합을 포함한 항레트로바이러스제 조합을 사용하도록 한다(A-I).

7. HBV 치료가 필요하나 TDF를 사용할 수 없는 경우, 대체요법으로 HBV와 사람면역결핍바이러스를 둘 다 치료할 수 있도록 고강도 항레트로바이러스요법과 entecavir를 사용할 수 있다(B-I). HBV를 치료하는 다른 약제 조합으로 고강도 항레트로바이러스요법과 함께 peginterferon- $\alpha$ 의 단독 치료를 병행하거나 telbivudine을 병용투여할 수 있으며, adefovir를 3TC나 FTC를 포함한 고강도 항바이러스요법과 같이 사용할 수 있다(B-II).

8. Entecavir의 경우 약한 항 HIV 효과가 있으며 고강도 항레트로바이러스요법을 하지 않은 상태에서 단독 사용할 경우 M184V 유전자 돌연변이(mutation)를 일으키므로 entecavir의 단독사용을 권장하지 않는다(A-II).

(1) 항바이러스제 선택 시 고려사항

Emtricitabine, lamivudine, tenofovir는 HIV와 HBV 모두에 치료효과가 있다. 이러한 약제를 중단하였을 때에는 HBV의 재활성화를 통한 심각한 간세포손상을 초래할 수 있다[179].

HIV/HBV 동시 감염환자에서 HBV의 치료제로 lamivudine이 단독으로 쓰였을 경우 Lamivudine 내성 HBV는 lamivudine 단독치료를 한 경우 2년 후에는 약 40%, 4년 후에는 약 90%가 관찰된다. 따라서 lamivudine은 다른 항 HBV 약제와 같이 쓰여야 한다(A-II) [180].

Entecavir는 항-HIV 효과가 있으며 HIV/HBV 동시 감염 환자에서 고강도 항레트로바이러스요법과 동반되지 않고 사용하였을 경우 M184V 변이를 일으켜 lamivudine과 emtricitabine에 내성을 일으키는 것으로 알려져 있다. 따라서, HIV/HBV 환자에서 entecavir를 사용하는 경우 효과적인 고강도 항레트로바이러스요법과 반드시 병행해야 한다[181] (A-II).

(2) HIV/HBV 동시감염 치료제의 선택

HBV나 사람면역결핍바이러스에 대해 현재 치료하고 있지 않으나 치료가 필요한 경우, Emtricitabine (FTC), Lamivudine (3TC), Tenofovir (TDF) 는 HIV와 HBV 모두에 치료효과가 있으므로, HBV나 HIV 중 한 가지만 치료가 필요한 경우 TDF + FTC나 TDF + 3TC 조합을 포함한 항레트로바이러스제 조합을 우선적으로 고려한다[63, 182, 183] (A-I).

단, HBV 치료가 필요하나 TDF를 사용할 수 없는 경우, 차선적 치료제 조합으로 HBV와 사람면역결핍바이러스를 둘 다 치료할 수 있도록 고강도 항레트로바이러스요법과 entecavir를 사용할 수 있다(A-II). Entecavir가 약한 항 HIV 효과가 있긴 하지만 고강도 항레트로바이러스요법을 위한 제제로 사용되어서는 안 된다[184] (B-II). Entecavir는 lamivudine과 내성기전을 일부 공유하며, entecavir와 lamivudine을 동시 사용하였을 경우 entecavir를 단독 사용하는 경우보다 바이러스학 적으로나 임상적으로 더 이득이 있다는 것은 알려져 있지 않다. 단, lamivudine 내성 HBV 감염인 경우, entecavir용량은 0.5 mg/일에서 1 mg/일로 증량해야 한다. 그러나 lamivudine 내성 HBV 감염의 경우 entecavir 내성 역시 빠른 속도로 나타날 수 있어 HBV DNA를 자주(예, 매 3개월) 측정하여 관찰할 것을 권장한다.

HBV를 치료하는 다른 약제 조합으로 고강도 항레트로바이러스요법과 함께 peginterferon-α의 단독치료를 병행하거나 telbivudine을 병용투여할 수 있으며, adefovir를 3TC나 FTC를 포함한 고강도 항바이러스요법과 같이 사용할 수 있다[63, 185, 186] (B-II). 단, peginterferon-α는 간경화가 있는 환자의 경우 사용을 금한다.

(3) 면역재구성증후군과 간기능

사람면역결핍바이러스나 HBV 치료 후 발생하는 면역재구성증후군(immune reconstitution)은 간수치 상승과 관련되어 있을 수 있다. 이는 HBV가 면역매개 질환이기 때문이다[187].

(4) 항레트로바이러스제에 의한 간기능 이상

일부 항레트로바이러스제는 간수치 상승을 일으킨다. 간수치 상승의 빈도나 심한 정도는 HIV/HBV 동시 감염 시 더 증가한다[188, 189]. 이러한 간수치 상승의 원인이나 결과는 명확하지 않으며 많은 경우 항레트로바이러스제 치료를 유지해도 호전된다. 그러나 일부 전문가들은 알라닌 아미노기전달효소(alanine aminotransferase; ALT) 수치가 정상 상한치의 5-10배 이상 증가하는 경우 의심되는 약제를 배제하고 있다. 그러나 HIV/HBV 동시 감염의 경우 이러한 간수치상승은 HBeAg으로의 혈청전환(seroconversion) 때문일 가능성이 있으므로, 약제를 중단하기 전 간수치 상승의 원인을 반드시 파악해야 한다. HBeAg 혈청전환 유무는 HBeAg과 anti-HBe, HBV DNA를 측정하여 알 수 있다.

(5) HIV/HBV 치료 시 치료반응의 평가

약제 내성의 발생과 치료반응을 평가하기 위해 HBV DNA를 12주 간격으로 측정한다. HBeAg 양성 환자의 경우 HBeAg는 6개월 간격으로 재측정한다.

치료반응은 다음과 같이 정의된다.

- ① 일차 무반응(primary non-response)은 치료시작 12주 후 HBV DNA가 1 log<sub>10</sub> 미만으로 감소한 경우이다.
- ② 완전 바이러스반응(complete virological response)은 치료 시작 24주에서 48주째 real time PCR법에 의한 혈청 HBV DNA가 검출되지 않는 것으로 정의된다.
- ③ 치료시작 24주 후 혈중 HBV DNA가 검출되지 않는 경우 약제 내성 발생 가능성이 낮다.
- ④ 치료시작 24주 후 HBV DNA가 1 log<sub>10</sub> 이상으로 감소하였으나 검출되는 경우를 부분적 바이러스 반응(partial virologic response)이라고 한다.
- ⑤ 지속적바이러스반응(sustained virologic response)은 치료 종료 시점 6개월 후에도 바이러스 검출이 되지 않는 경우를 의미한다.

일차무반응(primary non-response)을 보이는 경우는 해당 약제에 대한 내성 돌연변이가 발생을 확인하고 그 결과에 따라 치료방침을 정한다(B-I). 부분바이러스반응(partial virologic response)이 있는 경우 환자의 약제 순응도를 면밀히 확인해야 한다(B-I). 바이러스 돌파(virologic breakthrough)를 보이는 경우는 약제 순응도 확인 후, 약제 내성검사를 시행하고 그 결과에 따라 구조요법을 시행한다(A-I). 치료 중인 약제에 대한 내성 돌연변이가 확인된 경우에는 해당 내성에 대한 치료 지침을 따른다(A-I).

6) HIV/HBV 동시 감염 환자에서 항 HBV 효과를 갖는 약제(예, lamivudine, entecavir)를 중단해야 할 경우 유의할 점은?

9. 항 HBV 효과를 갖는 약제(예, lamivudine, entecavir)를 중단해야 할 경우: 항 HBV 효과를 갖는 약제를 중단하는 경우 HBV의 재활성화에 의한 심각한 간세포손상을 초래할 수 있으므로 환자가 자의로 약제를 중단하지 못하게 권유해야 하며 HBV 치료를 중단한 경우 간기능 검사를 자주 실시하면서 임상양상을 관찰해야 한다(A-II).

항 HBV 효과가 있는 약제를 중단해야 할 경우, 간기능 검사를 자주 실시하면서 환자의 임상 양상을 관찰한다. 간경화 환자와 같이 간기능이 얼마 남지 않은 환자의 경우 HBV 감염의 갑작스러운 악화를 예방하기 위해 adefovir dipivoxil, entecavir, telbivudine을 사용하는 것도 고려해 볼 수 있다[179]. 단, 이러한 HBV 치료 약제를 사용하는 경우 고강도 항레트로바이러스요법과 반드시 병행되어야 한다.

7) HIV/HBV 동시 감염 환자에서 사람면역결핍바이러스 치료실패로 항레트로바이러스 약제를 교체해야 할 경우 유의할 점은?

10. 사람면역결핍바이러스 치료실패로 항레트로바이러스 약제를 교체해야 할 경우 혈중 HBV 바이러스가 잘 조절되고 있는 경우이면 HBV 치료에 사용된 약제는 유지하고 다른 항레트로바이러스 약제를 사용하여 혈중 사람면역결핍바이러스 억제제를 유도한다(A-III).

사람면역결핍바이러스 내성발생으로 인해 항레트로바이러스 약제를 교체해야 하는 경우, HBV가 잘 조절되고 있었다면 HBV에 효과 있는 약제는 그대로 유지하고 다른 항레트로바이러스 약제를 교체하여 사람면역결핍바이러스를 치료한다(A-III).

8) HIV감염자에서 HCV감염여부는 어떻게 선별 검사해야 하며 바이러스간염에 대한 예방은 어떻게 해야 하는가?

- 11. 모든 HIV감염자는 C형간염 여부를 선별검사 해야하며, 되도록 항레트로바이러스제 치료 시작 전에 시행한다(A-III).
- 12. 선별검사는 혈중 anti-HCV 항체를 측정하여 시행하며, 선별검사 결과 음성인 경우 매해 재검사를 시행한다(A-II).
- 13. Anti-HCV 항체가 양성인 경우 활동성 감염을 진단하기 위해 HCV-RNA 정량검사를 시행한다(A-III).
- 14. HCV의 경우 감염된 주사침에 의해 감염되는 경우가 가장 높으므로, 주사약물사용자의 경우 약물중독치료를 시행하거나 불가능한 경우 주사침 재사용을 하지 못하게 교육한다. 차단법(barrier precaution)은 HCV뿐만 아니라 성매개질환의 예방에도 중요하므로 강력히 권고한다(B-III).
- 15. HIV/HCV 동시 감염이 있는 경우 금주를 권유하고, 사람면역결핍바이러스와 HCV의 전파를 예방할 수 있는 방법을 알려주며, 면역력이 없는 경우 HAV와 HBV에 대한 예방접종을 시행한다(A-III).

(1) HIV와 HCV 동시 감염의 영향

만성 HCV 감염의 장기연구결과에 따르면 약 33%의 환자가 20년 이내에 간경화로 진행한다고 한다[190, 191]. 간경화로의 진행속도는 나이가 많거나, 과도한 음주를 하거나, 남자의 경우, 사람면역결핍바이러스 감염이 동반되어 있는 경우 더 빨라진다고 한다[57, 192-194]. 메타분석에 의하면 HIV/HCV 동시 감염인 경우 HCV 단독감염에서보다 약 3배가량 간경화로의 진행속도가 빠르며[194] 이러한 현상은 CD4+ T 세포수가 낮을수록 더 확연히 나타난다. HIV/HCV 동시감염자에서 항레트로바이러스 치료를 하는 경우 HCV의 진행속도는 명확하지 않다. 또한, HCV 감염이 HIV의 진행에 악영향을 미치는지도 불명확하다.

(2) HIV 감염자에서 HCV 감염 선별검사

모든 HIV 감염자는 HCV 선별검사를 시행한다. 선별검사는 anti-HCV 항체를 가장 민감하게 검출할 수 있는 면역분석법으로 시행하도록 한다. 선별검사 결과 음성인 경우 매해 재검사를 시행한다. 단, 급성 HCV 감염환자에서 혈청전환(seroconversion)이 일어나기 전인 항체미형성기(window period)시 위음성이 나타날 수 있으나, 이 경우 간수치의 상승이 주로 동반되므로, anti-HCV 검사가 음성이거나 불명확(indeterminate)하며 간수치 상승이 동반되어있는 경우 HCV RNA를 검사한다[195]. 면역저하가 심한 HIV 감염자에서 위음성이 나타날 수 있으나 매우 드물다(<1%). Anti-HCV 항체가 양성인 경우 확진을 위해 혈장HCV-RNA 정량검사를 시행한다. 혈장 HCV-RNA의 양은 HCV 질환의 중증도와 무관하므로 HCV 치료를 시작하지 않은 환자에서 질병 진행을 감시하는 데에는 사용할 수 없다. 그러나, 혈장 HCV-RNA 수치는 치료 후 반응 여부를 예측할 수 있는 중요한 인자이다.

(3) 바이러스간염에 대한 예방

HCV의 경우 감염된 주사침에 의해 감염되는 경우가 가장 높으므로, 주사약물사용자의 경우 약물중독치료를 시행하거나 불가능한 경우 주사침 재사용을 하지 못하게 교육한다[196-198]. 차단법(barrier precaution)은 HCV뿐만 아니라 성매개질환(STD)의 예방에도 중요하므로 강력히 권고한다(B-III).

노출 후 HCV 감염을 막을 수 있는 예방접종은 존재하지 않는다. 그러나 초감염 후 6-12개월 내에 peginterferon ± ribavirin으로 치료하는 경우 만성감염으로 진행되는 것을 막을 수 있다[199, 200]. 따라서, 급성 HCV 감염이 있는 HIV 감염자에서 별다른 이유가 없다면 HCV 치료를 시작한다(A-II). 이때, C/C IL28B 유전형과 같이 급성기 바이러스 제거가 용이한 경우는 3-6개월 정도 지켜볼 수 있다[201]. 급성 HCV 감염의 경우 최적의 치료제나 기간이 정해져 있지는 않으나 최근 다수의 임상연구결과로 미루어보면 PegIFN/ribavirin으로 24주나 48주 치료하는 것을 권장한다[199, 200, 202](A-II).

HIV/HCV 동시 감염이 있는 경우 금주를 권유하고, 사람면역결핍바이러스와 HCV의 전파를 예방할 수 있는 방법을 알려주며, 면역력



이 없는 경우 HAV와 HBV에 대한 예방접종을 시행한다(A-III).

9) HIV/HCV 동시감염 환자에서 치료 전 평가는 어떻게 해야 하는가?

16. HCV 치료 전 HCV 유전형, IL28B 유전형을 시행하고 간질환의 중증도를 평가한다(A-II).

HCV의 치료 목표는 지속적 바이러스 반응(sustained virological response; SVR)에 도달하는 것이며, SVR은 HCV 치료를 중단한 지 6개월 이상이 경과한 후에도 바이러스 혈증이 관찰되지 않는 것을 의미한다. SVR은 한번 도달하면 HIV 감염여부와 무관하게 유지되므로 HCV 완치라고 간주한다. SVR은 말기 간질환, 간암 발생, 사망률을 낮추어 주고, 항레트로바이러스제에 의한 간독성 발생률을 낮추는 것으로 생각되고 있어 매우 중요하다.

(1) HIV/HCV 동시 감염의 경우 치료전 평가

모든 HIV/HCV 동시 감염환자는 HCV 치료를 고려해야 한다. 치료 전 다음과 같은 평가를 시행한다.

① HCV 유전형

인터페론을 포함한 HCV치료에 대한 치료반응은 HCV 유전형에 따라 달라지므로(유전형 2>3>1과 4) 치료 전 HCV 유전형의 평가를 시행하는 것은 매우 중요하다. HCV 1번 유전형에 의한 감염인 경우 바이러스 아형(A/B) 역시 치료 반응에 영향을 미치므로 검사를 요한다.

② IL28B 유전형

인터루킨 람다(Interleukin lambda)를 인코딩하는 사람 인터루킨 28B (IL-28B) 유전자 근처의 유전적 다형성(genetic polymorphism)은 HCV의 자발적 치료와 만성 C형간염에서의 IFN 치료 반응과 연관이 있다[203, 204]. 특히 염색체 19q13의 뉴클레오티드 rs12979860의 C/C 유전형은 C/T나 T/T 유전형에 비해 좋은 예후를 보인다. IL-28B 유전형에 따른 HCV 예후의 차이는 HIV 감염여부와 무관하다[205]. 그러나 IL-28B 유전형 결과의 유용성이나 비용대비 효과는 불명확하므로, IL-28B 유전형 검사를 HCV치료시작 전 꼭 시행할 필요는 없다.

③ 간질환의 중증도 평가

혈청 ALT와 AST의 기저수준과 연속적 감시를 시행한다. ALT와 AST값이 높으면 빠른 간질환의 진행을 시사하지만, ALT수치가 지속적으로 정상소견을 보인다고 해도 간경화가 있을 수 있다[206]. 간조직검사는 간질환의 중증도를 평가하고, 다른 간질환 원인을 배제하며, 치료 방침을 결정하는데 있어서 가장 좋은 방법이다. 그러나 간조직검사는 비용이 비싸고, 검사에 적합하지 않는 조직의 검출 가능성이 있으며 통증, 출혈(<0.5%), 담즙박막염(0.09%), 내부장기손상 등의 부작용이 있을 수 있어 HCV 시작 전 꼭 시행해야 하는 검사는 아니다.

10) 고강도 항레트로바이러스요법 치료 경험이 없는 HIV/HCV 동시 감염환자에서 언제 항레트로바이러스 치료를 시작하는가?

17. 모든 HIV/HCV 동시감염 환자에서 CD4+ T 세포수와 무관하게 항레트로바이러스제 치료를 고려한다(B-II). HIV/HCV 동시감염에서 HIV와 HCV를 모두 치료해야 하는 경우 약제가 많고, 약물상호작용과 독성때문에 어려운 점이 많다. HIV/HCV 동시감염환자에서 CD4+ T 세포수와 무관하게 항레트로바이러스제 치료를 권장하고 있지만 CD4+ T 세포수가 500 개/mm<sup>3</sup>인 경우 HCV치료 후 항레트로바이러스제 치료를 시작할 수 있다.

18. CD4+ T 세포수가 <200개/mm<sup>3</sup>로 낮은 경우 항레트로바이러스제 치료를 먼저 시작하여 CD4+ T 세포수가 회복된 후 HCV 치료를 시작하는 것이 권장된다(C-III).

간질환의 진행(간섬유화)은 HIV/HCV 동시 감염의 경우 빨라지며, 특히 CD4+ T 세포수가 낮은( $\leq 350$ 개/mm<sup>3</sup>) 경우 더 심하다. HCV 감염의 자연경과에 있어 항레트로바이러스제 치료의 영향에 대한 대부분의 연구가 후향적 코호트 연구이며 서로 다른 결과를 보여준다[57, 207, 208]. 그러나 항레트로바이러스제 치료는 면역기능을 회복시키고 사람면역결핍바이러스에 의한 면역 활성화와 염증반응을 억제함으로써 간질환의 진행 속도를 늦출 수 있다[59-61]. 따라서, 간경화를 포함한 대부분의 HIV/HCV 동시 감염 환자의 경우 약물유발성 간손상을 고려하더라도 항레트로바이러스제 치료를 하는 것이 좋다. 따라서, 모든 HIV/HCV 동시감염 환자에서 CD4 수치와 무관하게 항레트로바이러스제 치료를 고려한다(B-II). 단, HIV와 HCV를 모두 치료해야 하는 경우 약제가 많고, 약물상호작용과 독성 문제가 있어, CD4+ T 세포수가 500개/mm<sup>3</sup>인 경우 HCV치료 후 항레트로바이러스제 치료를 시작할 수 있다.

11) HIV/HCV 동시 감염 환자에서 어떠한 약제를 사용해야 하는가?

19. 고강도 항레트로바이러스 치료 경험이 없는 HIV/HCV 동시 감염 환자에서 초 치료시 약제의 조합은 사람면역결핍바이러스 단독 감염 환자의 경우와 동일하다(A-III). 단, 사람면역결핍바이러스와 HCV를 모두 치료해야 하는 경우에는 약물 사이의 상호작용 및 독성을 고려해야 한다.

20. HCV 유전형과 무관하게 Peginterferon alfa (PegIFN)와 ribavirin의 조합은 HIV/HCV 동시감염환자에서 기본치료제로 권장된다(A-I).

(1) HIV와 HCV 감염을 동시에 치료하는 경우 주의점

항레트로바이러스제 치료를 하지 않은 HIV/HCV 동시 감염 환자에서 초치료시 약제의 조합은 사람면역결핍바이러스 단독 감염 환자의 경우와 동일하다. 특별히 고려해야 할 경우는 다음과 같다.

① 사람면역결핍바이러스와 HCV를 모두 치료해야 하는 경우, 약제간 상호작용 및 독성을 고려해야 한다.

② 간경화 환자의 경우 간의 대상부전(liver decompensation) 여부를 Child-Turcotte-Pugh분류에 따라 면밀히 평가하고 Child-Pugh class B 또는 C에 해당하는 경우 간으로 대사되는 항레트로바이러스제의 용량을 조절하거나 금한다.

HIV/HCV 동시감염에서 사람면역결핍바이러스와 HCV를 모두 치료해야 하는 경우 약제가 많고, 약물상호작용과 독성때문에 어려운 점이 많다. 약제 선택시 다음과 같은 점을 고려한다.

- ① Didanosine은 ribavirin과 동시 투여하면 약물상호작용을 통한 심각한 didanosine 연관미토콘드리아 독성(간독성/지방간, 체장염, 유산증)을 초래할 수 있어 동시투여를 금한다[209] (A-II).
- ② Zidovudine과 ribavirin을 동시에 투여하는 것은 가능하면 금하는 것이 좋는데 그 이유는, zidovudine과 ribavirin을 동시에 투여하는 경우 빈혈의 발생빈도가 높아져 ribavirin의 용량을 줄여야 하는 경우가 생기기 때문이다[210] (A-II).
- ③ Abacavir는 peginterferon과 ribavirin에 대한 반응을 약화시킨다는 보고가 소수의 후향적 연구에서 있었다. 현재까지의 증거로는 위 약제의 동시투여를 금하기 충분치 못하다[211-213]. 따라서, HCV치료 전 abacavir를 중단하는 것은 권장되지 않는다 (B-III).

환자는 항레트로바이러스 치료 1달 후와 이후 매 3달마다 AST/ALT를 추적 관찰해야 한다. 만성 HCV 감염에서 경도 및 중등도의 간수치 상승은 흔히 있을 수 있으며 특별한 증상이 없는 한 항레트로바이러스 치료를 지속할 수 있다. 의미 있는 간수치 상승(정상치 상한선의 5배 이상)이 있는 경우 간손상의 증상 및 증후를 파악해야 하며 다른 이유(예, 급성 A형간염이나 B형간염 바이러스 감염, 간담도 질환, 알코올성 간질환)가 존재하는지 평가하여야 한다. 이 경우 단기간 항레트로바이러스제 치료의 중단이 필요할 수 있다[195].

(2) HIV/HCV 동시 감염에서의 항레트로바이러스 치료의 간독성 항레트로바이러스 치료 후 발생하는 약물유발성 간손상(drug induced liver injury, DILI)은 HIV단독감염의 경우보다 HIV/HCV 동시 감염에서 더 흔하다. 약물유발성 간손상은 HIV/HCV 동시 감염 환자에서 진행된 간 질환(예, 간경화, 말기 간질환)이 있는 경우 더 높은 빈도로 발생한다[214]. HCV 감염을 완치시키는 경우 항레트로바이러스제에 의한 약물유발성 간손상을 줄일 수 있다[215]. 서로 다른 임상 연구에서 항레트로바이러스제 치료 후 발생한 약물유발성 간손상의 빈도를 비교하는 것은 어려운 일이나, 간수치의 의미있는 상승(정상 상한선의 5배 이상)을 보인 약제는 주로 stavudine, nevirapine, 혹은 치료용량(full-dose)의 ritonavir (600 mg daily)에서 관찰되었다[216]. 또한, stavudine, didanosine, zidovudine과 같은 일부 뉴클레오시드 역전사효소억제제의 사용은 지방간의 발생과[217], didanosine은 비경화성 간문맥압항진증의 발생과 연관있으며[218] RTV boosted tipranavir에 의한 간독성의 위험이 있어 약제 사용을 되도록 제한

하는 것이 좋다.

12) HIV/HCV 동시 감염 환자의 치료는 어떻게 해야 하는가?

- 21. HIV/HCV 동시감염환자에서 PegIFN/ribavirin 48주 치료가 권장된다(A-I). 단, HCV genotype 2, 3에 의한 감염의 경우 치료 4주 후 혈중바이러스가 검출되지 않는 경우, 특히 심각한 부작용을 경험하는 환자에서 24주 치료를 할 수 있다(C-III).
- 22. Ribavirin을 사용이 불가능 한 경우 PegIFN 단독치료를 할 수 있다(B-II). 단 SVR에 다다를 확률이 낮아짐을 환자에게 설명해야 한다.
- 23. 임신부의 경우 PegIFN/ribavirin치료는 금기이다(A-II).
- 24. 치료를 시작한 환자는 항레트로바이러스 치료 1달 후와 이후 매 3달마다 아스파라긴산 아미노전이효소(aspartate aminotransferase, AST)/알라닌 아미노전이효소(alanine aminotransferase, ALT)를 추적관찰 해야 한다. 만성 HCV 감염에서 경도 및 중등도의 간수치 상승은 흔히 있을 수 있으며 특별한 증상이 없는 한 항레트로바이러스 치료를 지속할 수 있다. 의미 있는 간수치 상승(정상치 상한선의 5배 이상)이 있는 경우 간손상의 증상 및 증후를 파악해야 하며 다른 이유(예, 급성 A형간염이나 B형간염 바이러스 감염, 간담도 질환, 알코올성 간질환)가 존재하는지 평가해야 한다. 이 경우 단기간 항레트로바이러스제 치료의 중단이 필요할 수 있다(A-II).

(1) HIV와 HCV 감염을 동시에 치료하는 경우 주의점

HIV/HCV 동시감염환자에서 PegIFN/ribavirin 48주 치료가 권장된다(A-I). 단, HCV 유전형 2, 3에 의한 감염의 경우 치료 4주 후 혈중바이러스가 검출되지 않는 경우, 특히 심각한 부작용을 경험하는 환자에서 24주 치료를 할 수 있다(C-III).

Ribavirin의 사용이 불가능 한 경우 PegIFN 단독치료를 할 수 있다(B-II). 단 SVR에 다다를 확률이 낮아짐을 환자에게 설명해야 한다.

임신부의 경우 PegIFN/ribavirin 치료는 금기이다. IFN은 원숭이에서 높은 농도에서는 낙태효과가 있으며 직접적으로 항성장(antigrowth)과 항증식(antiproliferative) 효과가 있다. ribavirin의 다양한 동물에서 낮은 농도에서도 발생하는 최기성(teratogenicity)때문에 FDA 분류 상 X에 속한다. 가임기 여성과 ribavirin으로 치료받은 남성의 경우 ribavirin 치료 종료시점부터 6개월간 피임한다(A-III).

비대상성 간 경화가 있는 경우 간이식을 고려해 볼 수 있다(C-III).

(2) HIV와 HCV 감염 치료 반응 평가

바이러스학적 반응: HCV RNA는 치료 전, 치료 중, 치료 후 각각 평가되어야 한다.

- ① 치료 시작 4주 후: 치료시작 4주 후의 HCV RNA의 변화는 조기 SVR 가능성을 알려준다. PegIFN/ribavirin 치료 시 치료시작 4주 후 1 log<sub>10</sub> 미만의 감소를 보이는 경우 SVR에 다다를 확률은 5%

미만이다. 반면 빠른 바이러스 반응(rapid virological response; 치료시작 4주 후 측정 한도 이하의 바이러스혈증을 보이는 경우)인 경우는 80% 이상에서 SVR에 다다른다.

- ② 치료 시작 12주 후: PegIFN/ribavirin 치료 시, 2 log<sub>10</sub> 미만 감소를 보이는 경우 바이러스 무반응(null virologic response)이라고 하며 PegIFN/ribavirin 치료를 중단한다. 2 log<sub>10</sub> 이상 감소한 경우이나 바이러스혈증이 남아있는 경우를 부분 조기 바이러스반응(partial early virologic response)이라고 한다. 측정 한도 이하로 바이러스혈증이 검출되지 않는 경우를 완전 조기 바이러스반응(complete early virologic response)이라고 한다. 이 경우 SVR에 다다를 가능성은 60-65% 정도이다.
- ③ 치료 시작 24주 후: 치료 시작 12주 시 부분조기 바이러스반응(partial early virologic response)을 보인 환자는 24주에 재검을 해야 한다. 이때 혈중 바이러스가 검출되지 않으면 SVR의 가능성이 20% 정도이고, 이때 혈중 바이러스가 검출될 경우 모든 치료를 중지한다(B-I).
- ④ 치료 종료 시(치료 시작 24주 후나 48주 후): 바이러스 돌파(viral breakthrough)를 배제하고 치료 종료시점의 반응을 평가하기 위해 혈중 바이러스 농도를 측정한다.
- ⑤ 치료 종료 후: 치료 종료시점에서 혈중바이러스가 검출되지 않은 경우, 치료 종료 시점부터 24주 후에 재발여부를 평가하기 위해 혈중 HCV RNA를 측정한다. SVR은 치료 종료 시점에서 혈중 바이러스가 측정되지 않는 것으로 정의한다.

## 6. 임신부의 항레트로바이러스 치료

1. 임신을 하지 않은 HIV 감염 여자 성인의 항레트로바이러스제 치료 적응증과 치료 목표는 HIV 감염 청소년 및 남자 성인의 경우와 동일하다(A-I).
2. Nevirapine 투여 시 CD4 림프구수가 높고 (>250개/mm<sup>3</sup>) 간효소 수치가 상승되어 있는 여자 환자에서 발진을 동반한 치명적인 간독성의 위험이 높기 때문에 대체 약제를 고려해야 한다(A-I).
3. Efavirenz는 동물실험에서 태아에서 기형유발(teratogenic) 가능성을 보였기 때문에 가임기 여성에서는 임신 반응 검사 시행 후 처방해야 하며(A-III), 임신을 계획하거나 성접촉이 빈번해 임신할 가능성이 높은 여자 HIV 감염인의 경우는 efavirenz가 포함되지 않은 항레트로바이러스제 병합요법을 선택해야 한다(B-III).
4. 모든 HIV 감염 임신부는 임상적, 바이러스적 또는 면역학적 상태와 상관없이 항레트로바이러스제 병합요법을 받도록 권고한다(A-I).
5. HIV 감염 임신부는 임신중 항레트로바이러스제 병합요법의 이점과 위험에 대해서 충분히 설명을 받고, 치료 여부를 결정할 기회를 제공받아야 하며, 환자의 결정은 존중되어야 한다(A-III).

6. 항레트로바이러스제 치료 시작 전에 내성검사를 시행해야 하며, 내성검사 결과를 확인하기 위해서 치료 시작을 지연하지는 말아야 한다(A-III).
7. 항레트로바이러스제 치료 중 HIV RNA 역가가 500-1,000 copies/mL 이상으로 증가한 임신부는 약제 변경 전에 내성검사를 시행해야 한다(A-I).
8. HIV 감염 임신부에서 항레트로바이러스제 병합요법을 처음 시작한다면, 태아 기형 유발 가능성을 우려해 특히 임신 1기에는 efavirenz 처방을 피해야 한다(A-III).
9. 임신 전 efavirenz를 복용하며 충분한 바이러스 억제력을 보인 임신 1기의 HIV 감염 임신부는 efavirenz를 기반으로 한 병합요법을 유지할 수 있다(C-III).
10. 분만 전 HIV RNA 역가가 1,000 copies/mL 이상인 산모는 분만 시에 zidovudine 정맥투여를 시행해야 한다(A-I).
11. 항레트로바이러스제 병합요법으로 바이러스 역가가 1,000 copies/mL 미만으로 잘 억제가 되는 임신부는 분만 시의 zidovudine 정맥투여를 생략할 수 있다. 그러나, 분만 중에도 경구 항레트로바이러스제 병합요법을 계속 유지해야 한다(B-II).
12. 분만 시점에 혈중 HIV RNA 역가가 1,000 copies/mL 이상으로 높거나 검사를 시행하지 못한 임신부는 항레트로바이러스제 복용여부와 상관없이 임신 38주에 계획된 제왕절개 수술을 시행해서 태아에 대한 전파 가능성을 최소화해야 한다(A-II).
13. 항레트로바이러스제 복용 여부와 상관없이 모든 HIV 감염 임신부는 신생아에 대한 전파 우려가 있으므로 모유 수유를 피해야 한다(A-II).

### 1) 임신 전 관리

임신을 하지 않은 HIV 감염 여자 성인의 항레트로바이러스제 치료 적응증과 치료 목표는 HIV 감염 청소년 및 남자 성인의 경우와 동일하다(A-I). 남녀 사이에 체중, 혈장 용적, 혈중 단백질 농도, cytochrome P (CYP) 450 효소의 활성도, 약제 전달 및 배설 기능 등에 차이가 있기 때문에 항레트로바이러스제 치료를 시작하는 여자 환자는 몇 가지 고려해야 할 사항이 있다[219-221]. 우선, nevirapine 투여시 CD4 림프구수가 높고(>250개/mm<sup>3</sup>) 간효소 수치가 상승되어 있는 여자 환자에서 발진을 동반한 치명적인 간독성의 위험이 높기 때문에 처방을 피하고 대체 약제를 고려해야 한다[222-224] (A-I). 둘째, 여자 환자의 경우는 남자 환자에 비해서 항레트로바이러스제 치료 중 증상을 동반한 젖산증(lactic acidosis) 발생이 더 빈번하기 때문에 stavudine, didanosine, zidovudine 등의 NRTI 제제 처방시 주의 깊게 관찰해야 한다[225]. 셋째, 여자에서 남자와 비교해 중성지방 상승은 드물지만 복부 비만이 흔하고, 골감소증/골다공증의 악화 위험이 높기 때문에 폐경 후 여자 환자의 약제 선택시 신중히 고려해야 한다[226, 227]. 마지막으로, efavirenz는 동물실험에서 태아에서 기형유발(teratogenic) 가능성을 보였기 때문에 가임기 여성에서는 임신 반응 검사 시행 후

처방해야 하며(AIII), 임신을 계획하거나 성접촉이 빈번해 임신할 가능성이 높은 여자 HIV 감염인의 경우는 efavirenz가 포함되지 않은 항레트로바이러스제 병합요법을 선택해야 한다[228] (B-III). 약제에 의한 태아 기형은 임신 여부가 확인되지 않는 초기에 발생하기 때문에 임신 전 관리가 매우 중요하다.

진료의사는 의도하지 않은 임신과 태아에 대한 전파 가능성을 줄이기 위해서 가족 계획과 피임에 대한 상담을 제공해야 하며, 상담자는 항레트로바이러스제와 호르몬 피임제의 상호작용에 대해서 잘 알고 있어야 한다. Protease inhibitor (PI) 또는 Non-nucleoside reverse transcriptase inhibitor (NNRTI) 계열의 약제들은 혈중 ethinyl estradiol, norethindrone, norgestimate 등의 농도를 높이거나 낮춤으로써 피임효과를 감소시키고, ergosterone 또는 progestin과 연관된 혈전증 등의 합병증 발생 위험을 높일 수 있다[229-232]. Efavirenz는 ethinyl estradiol과 norgestimate을 포함한 복합 경구 피임제를 복용하는 여자에서 혈중 progestin 농도를 감소시키고, ritonavir-boostered PI 제제는 estradiol 농도를 감소시킬 수 있다. 진료의사는 대체 피임 방법을 권고할 수 있지만, 환자가 경구 또는 부착형 호르몬 피임법을 선호하는 경우에는 충분한 설명 후 처방할 수 있다. 자궁내 피임기구 (intrauterine device, IUD)는 HIV 감염 가입기 여자에게 안전하고 효과적인 피임방법으로 알려져 있다[233, 234].

#### 2) 분만 전 임신 기간 중 항레트로바이러스제 치료

임신 중의 HIV 감염인에 대한 항레트로바이러스제 병합요법은 HIV RNA 역가를 지속적으로 최대한 억제함으로써 태아에 대한 전파를 막기 위한 것이다. 신경관 결손의 위험은 임신 초기 5-6주 이전에 국한되고, 임신 여부는 대개 4-6주 이후에 확인되기 때문에 모든 HIV 감염 임신부는 임상적, 바이러스적 또는 면역학적 상태와 상관없이 항레트로바이러스제 병합요법을 받도록 권고한다(A-I). 항레트로바이러스제 병합요법을 임신 28주 이전에 시작해서 분만 시점에 HIV RNA 역가를 50 copies/mL 미만으로 억제함으로써 주산기 전파율을 20-30%에서 0.1-0.5%로 낮출 수 있었다[235, 236]. 그러나, HIV 감염 임신부는 임신중 항레트로바이러스제 병합요법의 이점과 위험에 대해서 충분히 설명을 받고, 치료 여부를 결정할 기회를 제공받아야 하며, 환자의 결정은 존중되어야 한다(A-III). 만약 환자가 항레트로바이러스제를 복용하기로 결정했다면, 진료의사는 상담시 항레트로바이러스제 복용 순응도의 중요성을 강조해야 한다(A-II). 항레트로바이러스제 치료 시작 전에 내성검사를 시행해야 하며, 내성검사 결과를 확인하기 위해서 치료 시작을 지연하지는 말아야 한다(A-III). 또한, 항레트로바이러스제 치료 중 HIV RNA 역가가 500-1,000 copies/mL 이상으로 증가한 임신부는 약제 변경 전에 내성검사를 시행해야 한다(A-I).

HIV 감염 임신부에서 항레트로바이러스제 병합요법을 처음 시작한다면, 태아 기형 유발 가능성을 우려해 특히 임신 1기에는 efavirenz 처방을 피해야 한다(A-III). 그러나, 임신중 불필요한 약제의 변경은 바이러스 증식 억제 실패로 태아에 대한 전파 위험을 높일 수 있다

[237]. 따라서, 임신 전 efavirenz를 복용하며 충분한 바이러스 억제를 보인 임신 1기의 HIV 감염 임신부는 efavirenz를 기반으로 한 병합요법을 유지할 수 있다(C-III).

#### 3) 분만 중 항레트로바이러스제 치료

분만시 zidovudine 정맥투여가 태아에 대한 바이러스 전파를 막기 위해서 모든 HIV 감염 임신부에게 권장되어 왔다. 그러나, 항레트로바이러스제 병합요법이 모든 임신부에게 임신 주수와 상관없이 권장되고 있는 상황에서 분만시 zidovudine 정맥투여의 유용성에 대해서는 논란이 있다.

항레트로바이러스제 치료 중인 HIV 감염 임신부로 구성된 대규모 주산기 코호트 연구가 프랑스에서 시행되었는데, 95%가 분만시 zidovudine 정맥투여를 받았으며 주산기 전파율은 zidovudine 정맥투여군(0.9%, 95/10,239)에서 미투여군(1.8%, 9/514)에 비해서 낮은 경향을 보였다( $P=0.06$ )[238]. 그러나, 분만시 HIV RNA 역가가 1,000 copies/mL 미만으로 적절하게 억제된 산모만을 대상으로 분석했을 때에는 zidovudine 미투여군(0%, 0/369)과 정맥 투여군(0.6%, 47/8,132) 사이에 유의한 차이가 없었다( $P>0.20$ ). 바이러스 억제가 불충분한(HIV RNA 역가 >1,000 copies/mL) 산모에서 태어난 신생아가 zidovudine 단독 요법으로 예방 처치를 받은 경우엔 분만시 zidovudine 정맥투여가 유의한 예방효과를 보였지만(2.5% 대 10.2%,  $P<0.01$ ), 2제 이상 병합요법으로 강화된 예방을 한 경우엔 차이가 없었다(4.8% 대 4.1%,  $P=0.83$ ). 따라서, 분만 전 HIV RNA 역가가 1,000 copies/mL 이상인 산모는 분만 시에 zidovudine 정맥투여를 시행해야 한다[228] (A-I). Zidovudine 정맥투여는 예정된 분만 3시간 전에 시작해야 한다. 처음 1시간 동안에 부하용량(2 mg/kg)을 투여하고 이후 2시간 동안 유지용량(1 mg/kg/hr)을 연속 주입해야 제대혈의 치료 농도에 도달할 수 있다. 항레트로바이러스제 병합요법으로 바이러스 역가가 1,000 copies/mL 미만으로 잘 억제가 되는 임신부는 분만 시의 zidovudine 정맥투여를 생략할 수 있다. 그러나, 분만 중에도 경구 항레트로바이러스제 병합요법을 계속 유지해야 한다(B-II).

분만 시점에 혈중 HIV RNA 역가가 1,000 copies/mL 이상으로 높거나 검사를 시행하지 못한 임신부는 항레트로바이러스제 복용여부와 상관없이 임신 38주에 계획된 제왕절개 수술을 시행해서 태아에 대한 전파 가능성을 최소화해야 한다[239] (A-II). 산모에서 혈중 HIV RNA 역가가 검출이 안될 정도로 억제되어 있는 경우에 출산시 태아에 대한 전파 가능성이 낮지만 전파 가능성을 완전히 배제할 수는 없다. 특히, 여성 생식기에 다른 감염 있는 임신부는 혈중 HIV RNA가 검출 안될 정도로 억제가 되어 있어도 생식기를 통해 지속적으로 낮은 농도의 HIV RNA 또는 DNA가 분비될 수 있으므로 분만 방법의 결정 시에 고려해야 한다[240].

#### 4) 분만 후 처치

출산 후 HIV 감염 임신부의 임상적, 면역학적(CD4 림프구수), 바이러스적(HIV RNA 역가) 추적 평가는 다른 HIV 감염인과 동일하게 지

속되어야 한다. 항레트로바이러스제 병합요법의 유지 기준(적응증)은 다른 HIV 감염인과 동일한데, 지속적으로 항레트로바이러스제 병합요법 유지가 필요한 경우에 출산 후 순응도가 떨어지므로 주의가 필요하다. 산모의 항레트로바이러스제 병합요법이 모유 수유시 신생아에 대한 HIV 전파를 줄일 수는 있지만 완전히 차단할 수는 없다. 따라서, 항레트로바이러스제 복용 여부와 상관없이 모든 HIV 감염 임산부는 신생아에 대한 전파 우려가 있으므로 모유 수유를 피해야 한다[241] (A-II). 또한, 분유 수유 직전에 유축기로 모유를 짜내는 행동 또한 신생아에 대한 HIV 전파 위험을 높이기 때문에 삼가해야 한다.

## 부록. 항레트로바이러스제 내성

### 1. 개요

사람면역결핍바이러스의 특정 돌연변이는 그 자체로 항레트로바이러스제에 대한 감수성을 저하시킬 수 있다. 한편, 약제 감수성을 저하시키는 돌연변이가 있으면 바이러스의 증식력이 떨어지는 경우가 흔한데, 이때 증식력 저하를 보완하기 위한 돌연변이가 생길 수도 있다. 항레트로바이러스제 감수성을 직접적으로 저하시키는 돌연변이, 내성 바이러스의 증식력 저하를 보완하는 돌연변이가 모두 약제 내성 돌연변이로 보는 것이 일반적이다.

특정 돌연변이를 약제 내성 돌연변이로 볼 것인지의 여부는 시험관 내에서 감수성 결과, 실제 임상 자료에서 치료 실패 여부 등을 감안하여 결정한다. 하지만, 시험관 내에서의 감수성 결과가 인체 내에서와 동일한 것은 아니다. 특히, 뉴클레오시드 역전사효소 억제제의 경우 세포 내에서 인산화된 후에 항레트로바이러스 효과를 발휘하는데, 인체 내에서와 실험용 세포 내에서의 인산화 효율이 다르기 때문에 시험관 내의 감수성 결과가 인체 내에서와는 크게 다를 수 있다. 또한, CCR5 억제제에 대한 내성의 경우 1) 기존에 이미 환자의 체내에 존재하던 X4 virus의 과증식(overgrowth), 2) HIV 표면의 gp120 (특히, V3 loop 부위) 또는 gp41의 돌연변이로 CCR5 억제제가 있는 상황에서 CCR5를 계속 보조수용체로 이용할 수 있는 능력을 획득하는 등의 형태로 나타날 수 있기 때문에 표준화된 감수성 검사법 확립 자체가 어렵다.

항레트로바이러스제를 투여할 경우에는 특정 약물 1가지만 투여하는 것이 아니라 다른 약과 같이 조합하는 경우가 많다. 따라서 같이 사용하는 약물이 얼마나 효과적으로 바이러스를 억제하느냐에 따라서 치료 실패 여부에 차이가 날 수 있다. 또한, 많은 경우에 내성 돌연변이는 단독으로 생기지 않고 다른 내성 돌연변이와 동반된다. 그렇기 때문에 특정 약물에 대한 특정 돌연변이가 치료 실패에 어느 정도 직접적인 영향을 끼쳤는지를 평가하는 것은 어려울 때가 많다.

위와 같은 제한점 때문에 각각의 돌연변이를 내성 돌연변이로 볼 것인지의 여부는 전문가들 사이에서도 이견이 있으며, 각 내성 돌연변이가 임상적으로 얼마나 의미가 있는지에 대한 해석도 다를 수 있

다. 이런 이유로 본 부록에 소개된 내성 돌연변이에 대한 해석 또한 절대적인 것이 아니며, 이견이 있을 수 있다. 따라서 임상자들은 항상 최신지견을 확인하고, 각각의 상황에 맞도록 내성 검사 결과를 해석해야 한다.

### 2. 내성 검사 해석의 일반적 원칙과 임상적 응용

#### 1) 내성 장벽

여러 개의 내성 돌연변이가 축적되어야 비로소 임상적으로 의미 있는 약제 내성이 유발되는 경우에 내성 장벽(resistance barrier) 또는 내성의 역치(resistance threshold)가 높다고 할 수 있다. 또한, 1개의 내성 돌연변이만 있어도 임상적으로 의미 있는 내성이 유도되지만 문제의 내성 돌연변이가 쉽게 생기지 않는다면 이 경우에도 내성 장벽이 높다고 할 수 있다. 본 장에서는 특정 약물을 단독으로 사용했을 경우 단기간 내에 내성이 쉽게 발현되는 경우에 내성 장벽이 낮은 약물로 지칭하고 그 반대의 경우를 내성 장벽이 높은 것으로 표현하겠다.

#### 2) 내성 검사의 종류

사람면역결핍바이러스 약제내성검사는 크게 유전형 검사(genotypic test)와 표현형 검사(phenotypic test)로 나눌 수 있다. 표현형 검사는 시간과 비용이 많이 필요하며 특정 약물에 대한 내성 여부를 알 수 있지만 어떤 기전에 의해 내성을 보이는지를 알 수 없는 등의 단점이 있기 때문에, 일반적으로 표현형 검사보다는 유전형 검사가 널리 이용되고 있다. 유전형 검사는 약제 내성과 관련된 돌연변이가 있는지를 알아보는 검사를 지칭한다. 유전형 검사 중에서는 standard cloning을 이용한 전통적 표현형 검사가 가장 많이 이용된다. 전통적 유전형 검사는 내성 바이러스가 10-20% 정도는 되어야 검출이 가능하다는 한계가 있다. 전통적 유전형 검사의 한계를 극복하기 위해 single genome sequencing, pyrosequencing을 이용한 방법, allele-specific PCR, parallel allele-specific PCR 등이 개발되어 있지만 아직까지 일반화되어 있지는 않다[242-245]. 본 부록에서는 전통적 유전형 검사의 해석과 이의 임상적 의의에 대해 다루고자 한다.

#### 3) 내성 검사의 해석의 일반적 원칙

내성 검사를 해석할 때 일반적으로 주의해야 할 사항은 아래와 같다. 첫째, 내성 검사에서 내성 돌연변이가 없는 것으로 보고되었더라도, 검출 한계 이하의 적은 수의 내성 바이러스(minor resistant variant)가 존재할 수 있다는 점에 유의해야 한다.

둘째, 치료력이 있는 환자에서 약물 중단 후 상당한 시간이 지난 시점에서 시행한 내성 검사는 민감도가 심각하게 떨어질 수 있다. 내성 바이러스는 증식력이 떨어지는 경향이 있기 때문에 약물을 중단하면 내성 바이러스는 줄어들고 야생형 바이러스가 활발히 증식한다. 따라서 내성 바이러스를 가지고 있는 환자라고 하더라도 약물을 중단하고 오랜 기간이 경과되었다면 내성 바이러스가 검출 한계 미만

으로 줄어들 수 있다. 특히 K70R, M184V, T215Y, Y181C 등의 내성 돌연변이를 가지고 있는 바이러스는 약제 중단 이후에 빠르게 줄어드는 경향이 있다[32, 246]. 이런 이유로 치료력이 있는 환자에서 내성 검사는 가급적 약물 복용 중 또는 약물 중단 이후 4주 이내에 할 것을 권장하는 것이 일반적이다.

셋째, 특정한 내성 돌연변이가 확인된 환자에서, 이후의 내성 검사에서 내성 돌연변이가 없는 것으로 보고되었다고 하더라도, 실제로 상기의 내성 돌연변이는 지속적으로 존재하는 것으로 간주해야 한다. 특정 돌연변이가 생긴 후 치료 여부, 치료 약제의 조합 등에 따라 해당 돌연변이를 가진 바이러스가 환자의 혈중(plasma)에서는 줄어들 수 있다. 하지만 이미 생긴 돌연변이 바이러스는 proviral DNA 형태로 세포 내에 존재할 수 있기 때문에[247], 추후 해당 내성 돌연변이 바이러스가 다시 증식할 수 있다.

#### 4) 내성 장벽, 약물 반감기, 치료 실패, 내성의 발현

내성 장벽의 크기는 lamivudine (emtricitabine) < 비뉴클레오시드 역전사효소 억제제 < lamivudine (emtricitabine)을 제외한 뉴클레오시드 역전사효소 억제제 < 단백분해효소 억제제의 순이다. 개발된 1세대 통합효소 억제제(INSTI, integrase strand transfer inhibitor)의 내성 장벽은 비뉴클레오시드 역전사효소 억제제보다는 높고 단백분해효소 억제제보다는 낮다. 최근 개발된 2세대 통합효소 억제제는 단백분해효소 억제제에 필적할 만큼 내성 장벽이 높다.

1세대 비뉴클레오시드 역전사효소 억제제가 내성 장벽이 낮다는 의미는 주의해서 해석이 필요하다. 1세대 비뉴클레오시드 역전사효소 억제제라고 하더라도 혈중 농도는 IC<sub>50</sub>의 적어도 수십 배 많게는 수백 배 이상으로 유지된다. 다만, 내성 돌연변이가 하나라도 생기면 IC<sub>50</sub>가 심각하게 증가해서 임상적으로 의미 있는 내성을 보인다는 뜻이다.

Lamivudine이 내성 장벽이 낮다고 해서 lamivudine과 관련된 내성 돌연변이가 항상 가장 먼저 발생하는 것은 아니다. 예를 들어 abacavir/lamivudine + efavirenz로 항레트로바이러스 치료를 받던 환자가 약물을 중단했다고 가정해 보자. 이 환자에게 사용한 약물의 내성 장벽 크기는 lamivudine < efavirenz < abacavir 순이다. 한편, 약물의 혈중 반감기는 abacavir < lamivudine << efavirenz의 순이다. 혈중 반감기를 고려한다면, 약물 중단 후 상당한 시간이 경과된 시점에서는 저용량의 efavirenz 단독 요법을 하는 경우와 비슷한 상황이 된다. 따라서 이런 때에는 efavirenz에 대한 내성이 발현될 확률이 lamivudine에 대한 내성이 생길 가능성보다 더 높다.

한편, 실패한 항레트로바이러스제 조합에 단백분해효소 억제제가 포함되어 있을 경우라고 하더라도 해당 단백분해효소 억제제는 여전히 감수성을 유지하고 있는 경우가 많다.

#### 5) 내성 검사 결과에 따른 항레트로바이러스 약제의 선택

내성 돌연변이의 개수가 비교적 적은 경우에는 충분히 효과가 있는 약제(fully active agents)만으로 새로운 항레트로바이러스제 조합

을 만들 수 있기 때문에 향후 치료에 큰 문제가 없다. 하지만 내성 돌연변이의 수가 많을 경우에는 다음의 사항을 염두에 두고 약제를 선택하는 것이 좋겠다.

첫째, 향후 사용될 수 있는 약물과 교차내성을 유발하지 않도록 한다. 예를 들면 2세대 비뉴클레오시드 역전사효소 억제제인 etravirine은 1세대 비뉴클레오시드 역전사효소 억제제와 교차 내성을 보이는 경우가 많기 때문에 etravirine을 투여 예정인 환자에서 1세대 비뉴클레오시드 역전사효소 억제제의 투여는 피하는 것이 좋다[248]. 또한 통합효소의 148번 아미노산에 내성 돌연변이가 생긴 환자에게 1세대 통합효소 억제제를 계속 투여해서 추가적인 내성 돌연변이가 유도되어 2세대 통합효소 억제제인 dolutegravir에도 내성을 보일 수 있다[249-253]. 따라서 2세대 통합효소 억제제 투여를 계획하는 환자에게 1세대 통합효소 억제제의 투여는 신중을 기하는 것이 좋다.

둘째, 내성 돌연변이와 각 약제의 상호작용을 동시에 고려해야 한다. 일부의 내성 돌연변이는 다른 내성 돌연변이를 억제하는 역할을 하기도 하며, 특정 약물에 대한 특정 내성 돌연변이는 다른 약물에 감수성을 증가시키기도 한다. 따라서 이를 잘 이용하면 추가적인 내성 돌연변이를 막으면서 바이러스를 억제하는데 도움이 될 수 있다. 대표적으로 M184V는 zidovudine, stavudine, tenofovir에 대한 감수성을 증가시키며[254], K65R, L74V, Y181C 등은 zidovudine에 대한 감수성을 증가시킨다[255-257]. 또한, 뉴클레오시드 역전사효소 억제제 내성 돌연변이(특히, TAM-1, M184V)가 있을 경우 비뉴클레오시드 역전사효소 억제제에 대한 감수성이 증가하는 경향이 있다[258]. boosted atazanavir 치료 실패 환자에서 흔히 발견되는 I50L은 다른 단백분해효소 억제제에 대한 감수성을 증가시키며[259], N88S는 boosted fosamprenavir의 감수성을 증가시킨다[260].

셋째, 내성 돌연변이에 따른 바이러스의 증식력 변화를 고려해야 한다. 내성 돌연변이가 생긴 바이러스는 증식력이 떨어지는 경향이 있다. 따라서 내성이 유도된 약제라고 하더라도 임상적으로는 유용할 수 있다. 시판되는 모든 약물에 내성을 보이는 사례에서는 바이러스의 억제는 포기하고 현상 유지 또는 질병의 악화 속도를 늦추기 위한 치료를 시도해야 하는데, 이때에는 내성 돌연변이와 이에 따른 바이러스의 증식력 감소, 약제의 부작용 등을 고려해서 치료제 조합을 결정해야 한다.

### 3. 각 약제에 대한 내성 돌연변이

지금부터는 IAS-USA(International Antiviral Society-USA)에서 선정한 사람면역결핍바이러스 약제 내성 돌연변이 중에서[261], 국내에서 비교적 흔히 발견되는 돌연변이를 어떻게 해석할지에 대해 알아보겠다.

#### 1) 뉴클레오시드 역전사효소 억제제 내성

뉴클레오시드 역전사효소 억제제는 약물에 따라 서로 다른 패턴의 내성을 유발하고, 복잡한 상호작용을 하기 때문에 해석이 어려운 경우가 많다. 뉴클레오시드 역전사효소 억제제의 내성은 크게 다음의 2

가지 기전에 의해 일어난다[262-264].

첫째, DNA 사슬에 끼어들어간 뉴클레오시드 역전사효소 억제제를 제거하는 것으로 이는 primer unblocking, primer rescue, pyrophosphorolysis, nucleotide excision 등으로 불린다. Thymidine 유사체 돌연변이(thymidine analogue mutation, TAM) 및 TAM 발생과 관련된 2차적인 돌연변이가 주로 이런 기전으로 발생한다.

둘째, 뉴클레오시드 역전사효소 억제제가 DNA 사슬에 끼어들어가는 것 자체를 막는 것으로 이를 NRTI discrimination이라고도 한다. tenofovir, abacavir, lamivudine, emtricitabine에 대한 내성 돌연변이가 이런 기전에 의해 일어나며, didanosine과 관련된 주요 내성 돌연변이도 이와 연관된다. 구체적인 예로 K65R, L74V, M184V, Q151M 복합 돌연변이 등이 있다.

일반적으로 내성 돌연변이가 있을 경우 바이러스의 증식력이 떨어진다고 하는데, 특히 뉴클레오시드 역전사효소 억제제에 대한 내성이 있을 경우에 더 그렇다. 그중에서도 NRTI discrimination에 의한 돌연변이가 있을 경우 증식력이 더 떨어지고, 그 중 M184V가 있을 경우 증식력이 현저히 떨어진다[265-269]. 한편, primer unblocking에 의한 내성 돌연변이와 NRTI discrimination에 의한 내성 돌연변이는 서로의 발현을 억제하는 경향이 있다[270-272].

M184V는 뉴클레오시드 역전사효소 억제제 내성 돌연변이 중에서 가장 흔하게 발견된다. M184V가 있을 경우 lamivudine, emtricitabine에는 매우 높은 수준의 내성을 보이지만 zidovudine, stavudine, tenofovir에는 감수성이 증가하며 바이러스의 증식력이 현저히 떨어진다[255, 273]. 이런 특징을 이용하기 위해서 M184V가 동반되어 있는 경우에도 lamivudine, emtricitabine을 항레트로바이러스제 조합에 포함시키는 경우가 종종 있다.

TAM은 thymidine 유사체인 zidovudine, stavudine에 의해 유발된다. TAM은 크게 type 1과 type 2로 나눌 수 있는데 M41L, L210W, T215Y가 type 1에 속하고, D67N, K70R, L215F, K219Q/E가 type 2에 속한다[274-278]. TAM-2의 경우 내성 유발의 정도가 TAM-1에 비해 작다. TAM-1과 TAM-2는 배타적으로 생기는 경향이 있다. 하지만, D67N의 경우 TAM-1과 같이 발생하는 경우가 종종 있으며, zidovudine 또는 stavudine에 장기간 노출된 경우에는 여러 개의 TAM-1과 TAM-2가 동시에 생길 수도 있다. TAM은 zidovudine, stavudine에는 비교적 높은 수준의 내성을 유발하며, TAM이 2-3개 이상 동반되어 있을 경우에는 didanosine, abacavir, tenofovir에 대해서도 내성을 보인다[273].

항레트로바이러스제를 중단하면 내성 바이러스가 다시 원래의 감수성이 있는 바이러스로 환원되는 경향이 있다. 그런데 T215Y의 경우 Y → T로 다시 환원되려면 2개의 염기가 바뀌어야 하기 때문에 원래로 돌아가는 것이 쉽지 않다. 따라서 T215Y는 항레트로바이러스제에 의한 선택적 압력이 사라지면 T가 아닌 A/C/D/E/G/H/I/L/N/S/V로 치환된다[279-281]. 만일 치료력이 있는 환자에서 T215A/C/D/E/G/H/I/L/N/S/V revertant가 발견된다면 TAM-1이 있는 것으로 간주해야 한다.

K65R은 주로 abacavir, tenofovir를 투여하는 경우에 선택되는 내성 돌연변이로 abacavir, didanosine, tenofovir, lamivudine, emtricitabine에는 중등도의 내성을 유발한다. K65R 돌연변이가 발생하면 zidovudine에 대한 감수성이 증가되며, zidovudine이 포함된 항레트로바이러스 치료를 받는 환자에서는 잘 발생하지 않는다[255, 282]. K65R은 non-subtype B에서 비교적 흔하다[283, 284]. L74V는 didanosine, abacavir에 의해 유발되며, didanosine, abacavir에 중등도의 내성을 유발한다[285-287]. L74V가 있을 경우 zidovudine, tenofovir에 감수성이 증가될 수 있다[256].

## 2) 비뉴클레오시드 역전사효소 억제제 내성

사람면역결핍바이러스의 역전사효소에 특정 돌연변이가 발생해서 역전사효소의 구조에 변화가 오면 비뉴클레오시드 역전사효소 억제제와의 친화력이 떨어지게 되는데, 이렇게 되면 비뉴클레오시드 역전사효소 억제제에 내성을 보이게 된다. 2세대 비뉴클레오시드 역전사효소 억제제는 더 유연한 형태로 고안되어 역전사효소의 구조에 약간의 변화가 있더라도 친화력을 유지할 수 있도록 개발되고 있다.

비뉴클레오시드 역전사효소 억제제 투여 환자에서 K103N/S, Y181C/I/V, V106A/M, G190A/S/E 등이 가장 먼저 나타나는 경향이 있다. 특히 efavirenz를 사용한 환자에서 K103N이 가장 먼저 출현한다[256, 288, 289]. 그러나, 최근 구조가 1세대 비뉴클레오시드 역전사효소 억제제와 다른 구조를 가진 비뉴클레오시드 역전사효소 억제제가 개발되면서 이러한 내성 패턴에도 변화가 있다. 최근에 출시된 rilpivirine은 E138K을 가장 먼저 유도하는 경향이 있으며[87, 290], 2세대 비뉴클레오시드 역전사효소 억제제인 eravirine과 ripivirine은 1세대 약물에서 흔히 문제되던 K103N이 있어도 감수성이 유지된다는 장점이 있다[142, 256, 291].

비뉴클레오시드 역전사효소 억제제 내성 돌연변이 중 가장 흔하게 접하는 K103N은 그 빈도도 흔하지만 돌연변이에도 불구하고 바이러스의 증식력이 야생형 바이러스와 비슷할 정도로 왕성하기 때문에 문제가 된다. 반면, V106A, Y188C, G190S 등은 바이러스의 증식력을 떨어뜨린다[292-295].

1세대 비뉴클레오시드 역전사효소 억제제인 nevirapine과 efavirenz는 IAS-USA에서 선정한 내성 돌연변이 중 1개만 있더라도 의미 있는 내성이 유발되기 때문에 해석이 비교적 명료하다. 하지만 최근 승인된 etravirine의 경우 1개 이상의 내성 돌연변이가 있더라도 감수성을 유지하는 경우가 있기 때문에 해석이 어렵다.

Etravirine의 경우 각 내성 돌연변이에 가중치를 부여하고, 가중치의 합산 값으로 감수성 여부 또는 치료 성공 확률을 예측한다. 제조사에서 제안한 etravirine 내성 돌연변이의 가중치는 아래와 같다[291].

가중치 3.0: Y181I/V

가중치 2.5: K101P, L100I, Y181C, M230L

가중치 1.5: E138A, V106I, G190S, V179F

가중치 1.0: V90I, V179D, K101E, K101H, A98G, V179T, G190A

HIV RNA >5,000 copies/mL이고 1개 이상의 비뉴클레오시드 역전사효소 억제제 내성 돌연변이가 있는 환자를 대상으로 한 연구 (DUET study)의 24주째 결과에 대한 분석에서, *etravirine* + *boosted-darunavir* + 최적 배경요법을 처방 받은 환자에서 *etravirine* 가중치의 합이 0-2.0일 경우 74.4%에서 바이러스가 성공적으로 억제되었으며, 2.5-3.5일 경우에는 52.0%, 4.0 이상일 경우 37.7%에서만 바이러스가 억제되었다. E138A는 가중치는 비록 높지 않지만 *etravirine*이 포함된 항바이러스 치료의 실패와 밀접한 관계가 있다[296].

한편, *etravirine*은 비뉴클레오시드 역전사효소 억제제 내성 돌연변이 중 흔하게 문제가 되는 K103N이 있을 경우에도 감수성이 유지된다는 장점이 있다. 하지만 K103N이 L100I, K101P와 동반되어 나타날 수 있기 때문에 주의가 필요하다[256].

HIV-2는 비뉴클레오시드 역전사효소 억제제에 원래 내성을 보인다[297].

### 3) 단백질분해효소 억제제 내성

단백분해효소 억제제는 내성 장벽이 매우 높다는 장점이 있다. 한편, 단백질분해효소 억제제가 포함된 항레트로바이러스 치료를 받고 바이러스 억제에 실패한 경우라고 하더라도, 단백질분해효소 억제제는 계속 감수성을 유지하는 때가 많아 추후 치료제 조합에 다시 사용할 수도 있다.

대개의 경우 단백질분해효소 억제제 내성은 여러 개의 내성 돌연변이가 누적된 결과로, 각각의 단백질분해효소 억제제가 사람면역결핍 바이러스의 단백질분해효소와 접촉하는 부위가 약간씩 다르기 때문에 특정한 내성 돌연변이가 각각의 단백질분해효소 억제제의 내성 유발 정도에 미치는 영향은 다를 수 있다[298-300]. 각각의 단백질분해효소 억제제에 대한 내성 돌연변이는 단백질분해효소가 원래의 기질과 결합하는 틈(cleft) 주변에서 시작할 때가 많다.

단백분해효소 억제제에 대한 감수성 감소에 증대한 영향을 미치는 돌연변이를 major mutation, 내성에 영향을 주기는 하지만 상대적으로 효과가 미약한 경우를 minor mutation이라고 흔히 지칭한다. 각각의 내성 돌연변이가 각 약물의 내성에 어느 정도나 영향을 미치고 있는지는 Stanford 대학에서 운영하는 'HIV Drug Resistance Database (<http://hivdb.stanford.edu/>)'에서 확인할 수 있다.

단백분해효소 억제제에 대해 내성을 보이는 바이러스는 여러 개의 내성 돌연변이를 동시에 가지고 있을 때가 많다. 따라서 각각의 내성 돌연변이가 약물 감수성 및 바이러스 증식력에 미치는 영향을 평가하는 것은 한계가 있다. D30N, G48V, I50V, V82A/T가 동반되어 있을 경우 바이러스의 증식력이 많이 저하되며, M46I/L, I54V, I84V, N88D/S, L90M 등도 바이러스의 증식력을 저하시키는 것으로 알려져 있다[301-306].

최근 국내에서 주로 사용하는 단백질분해효소 억제제의 내성에 대한 장벽은 *boosted atazanavir* < *boosted lopinavir* < *boosted darunavir*의 순이다. *Boosted atazanavir*는 major mutation이 하나라도 있으면 치

료 실패 확률이 매우 높은 단점이 있지만, 다른 단백질분해효소 억제제와 내성 패턴이 다르다는 장점이 있다[248]. 따라서 *boosted atazanavir*에 내성을 보인 경우라고 하더라도 다른 단백질분해효소 억제제를 유용하게 사용할 수 있는 경우가 종종 있다.

### 4) 통합효소 억제제 내성

통합효소 억제제에 대한 내성은 약제와 통합효소(integrase)가 결합하는 부위에서 일어난다.

국내에 시판되고 있는 *raltegravir*에 대한 내성은 Q148R/H/K, N155H의 경로에 의해 주로 일어나고, 드물게 Y143C/H/R, E92Q와 연관된 돌연변이에 의해서도 일어난다. 한 바이러스 내에서 Q148R/H/K, N155H가 동시에 생길 수도 있지만, 그렇게 될 경우 바이러스의 증식력이 현저히 저하되기 때문에 궁극적으로는 서로 배타적으로 일어난다. 사람면역결핍바이러스가 *raltegravir*에 임상적으로 의미 있는 내성을 보이려면 위의 내성 돌연변이에 1가지 이상의 다른 돌연변이가 동반되어야 하는 경우가 대부분이다. Q148H/K/R은 주로 L74M, E138A/K, G140S 등과 같이 발생하여 내성을 유발하고, N155H는 L74M, E92Q, T97A, Y143H, G163K/R, V151I, D232N 등과 같이 나타난다[163, 307-316].

1세대 통합효소 억제제인 *raltegravir*와 *elvitegravir*는 교차내성이 빈번하다. 다만 Y143R/H/C는 *raltegravir* 감수성을 심각하게 저하시키지만 *elvitegravir* 감수성에는 영향을 미치는 영향은 적다[317-318]. 반대로, E92Q 단독으로도 *elvitegravir*의 감수성을 심각하게 저하시키지만, *raltegravir* 감수성에 미치는 영향은 적으며, S147G는 *elvitegravir* 감수성을 심각하게 저하시키지만 *raltegravir* 감수성에는 영향을 미치지 않는다[163, 315, 317-320].

2세대 통합효소 억제제인 *dolutegravir*는 1세대 통합효소 억제제와 교차 내성이 적은 것으로 알려져 있으나, Q148R + G140S, Q148K + E138K, Q148R + G140A 등이 있을 경우 2세대 통합효소 억제제에도 내성을 보일 수 있다[249, 254, 321, 322].

*Dolutegravir*를 초치료제로 사용할 경우에는 R263K pathway가 중요하며 이는 R263K에 M50I, H51Y, E138K 등이 조합된 형태로 나타난다[323-326]. *Dolutegravir*는 1세대 통합효소 억제제에 비해 통합효소에 친화력이 높으며 더 장시간 결합한다[327]. 또한, R263K pathway mutation이 있다고 하더라도 심각한 정도의 내성을 유발하지는 않는 반면 viral fitness는 상당히 저하된다[328, 329]. 또한, 이런 이유로 *dolutegravir*는 내성 장벽이 높으며 초치료제로 사용하면 임상적으로 의미 있는 *dolutegravir*에 대한 내성은 없거나 매우 드물 것으로 추측된다.



## 맺음말

### 1. 본 임상진료지침의 제한점 및 향후 추가되어야 할 내용

본 임상진료지침은 국내 사람면역결핍바이러스 감염인의 진료에 도움을 주고자 만들어졌지만, 국내 사람면역결핍바이러스 감염인에 대한 충분한 임상 연구 결과가 없는 상황에 대해서는 국외의 연구 결과들을 토대로 마련되었으므로, 권고 근거가 되는 대부분의 임상 연구들은 국외에서 수행된 것이고, 이를 임상에서 적용할 때 이러한 사항이 충분히 고려되어야 한다. 따라서, 국내 사람면역결핍바이러스 감염인에 대하여 적절한 임상진료지침 개정을 위하여서는 향후 국내 사람면역결핍바이러스 감염인들에 대한 대규모 코호트 연구를 통한 국내 임상 자료의 축적이 반드시 필요하다.

고강도 항레트로바이러스요법 도입 후 HIV 감염인의 수명이 현저히 늘어나면서 심혈관질환, 콩팥질환, 골감소 및 골다공, 종양, 신경인지기능 장애 등과 같은 이른바 비에이즈 질환들에 대한 관심이 증가하고 있다. 이러한 비에이즈 질환의 발생률은 국가별, 인종별로 차이가 있으므로 우리나라 사람면역결핍바이러스 감염인을 대상으로 한 비에이즈 질환 발생률과 임상양상에 대한 연구가 필요하다. 우리나라 사람면역결핍바이러스 감염인을 대상으로 심혈관질환[72], 골감소증[330], 종양[331], 신경인지기능 장애[332] 등에 대한 자료가 발표된 바 있으며 향후 더 많은 자료의 축적이 필요하다.

### 2. COI (Conflict of Interest)

본 임상진료지침은 질병관리본부의 정책개발연구비를 수주하여 개정되었으나 이외에는 정부기관, 제약회사, 병원단체 및 이익단체로부터 어떠한 영향도 받지 않았음을 밝혀둔다.

### 3. 지침 개정에 대한 계획

본 임상진료지침은 향후 국내에서 사용이 가능한 항레트로바이러스 약제의 변경 및 국내외 주요 최근 연구 결과들을 반영하여 국내 실정에 적합한 임상진료지침이 되도록 주기적으로 개정할 예정이다.

## References

- Aberg JA, Kaplan JE, Libman H, Emmanuel P, Anderson JR, Stone VE, Oleske JM, Currier JS, Gallant JE; HIV Medicine Association of the Infectious Diseases Society of America. Primary care guidelines for the management of persons infected with human immunodeficiency virus: 2009 update by the HIV medicine Association of the Infectious Diseases Society of America. *Clin Infect Dis* 2009; 49:651-81.
- Egger M, May M, Chêne G, Phillips AN, Ledergerber B, Dabis F, Costagliola D, D'Arminio Monforte A, de Wolf F, Reiss P, Lundgren JD, Justice AC, Staszewski S, Leport C, Hogg RS, Sabin CA, Gill MJ, Salzberger B, Sterne JA; ART Cohort Collaboration. Prognosis of HIV-1-infected patients starting highly active antiretroviral therapy: a collaborative analysis of prospective studies. *Lancet* 2002;360: 119-29.
- Hughes MD, Johnson VA, Hirsch MS, Bremer JW, Elbeik T, Erice A, Kuritzkes DR, Scott WA, Spector SA, Basgoz N, Fischl MA, D'Aquila RT. Monitoring plasma HIV-1 RNA levels in addition to CD4+ lymphocyte count improves assessment of antiretroviral therapeutic response. ACTG 241 Protocol Virology Substudy Team. *Ann Intern Med* 1997;126:929-38.
- Mellors JW, Muñoz A, Giorgi JV, Margolick JB, Tassoni CJ, Gupta P, Kingsley LA, Todd JA, Saah AJ, Detels R, Phair JP, Rinaldo CR Jr. Plasma viral load and CD4+ lymphocytes as prognostic markers of HIV-1 infection. *Ann Intern Med* 1997;126:946-54.
- Moore RD, Chaison RE. Natural history of opportunistic disease in an HIV-infected urban clinical cohort. *Ann Intern Med* 1996;124:633-42.
- Marschner IC, Collier AC, Coombs RW, D'Aquila RT, DeGruttola V, Fischl MA, Hammer SM, Hughes MD, Johnson VA, Katzenstein DA, Richman DD, Smeaton LM, Spector SA, Saag MS. Use of changes in plasma levels of human immunodeficiency virus type 1 RNA to assess the clinical benefit of antiretroviral therapy. *J Infect Dis* 1998;177:40-7.
- Thiébaud R, Morlat P, Jacqmin-Gadda H, Neau D, Mercié P, Dabis F, Chêne G. Clinical progression of HIV-1 infection according to the viral response during the first year of antiretroviral treatment. Groupe d'Epidemiologie du SIDA en Aquitaine (GECSA). *AIDS* 2000;14:971-8.
- Freedberg KA, Malaban A, Samet JH, Libman H. Initial assessment of patients infected with human immunodeficiency virus: the yield and cost of laboratory testing. *J Acquir Immune Defic Syndr* 1994;7:1134-40.
- Samaras K. Prevalence and pathogenesis of diabetes mellitus in HIV-1 infection treated with combined antiretroviral therapy. *J Acquir Immune Defic Syndr* 2009;50:499-505.
- Antinori A, Ammassari A, Torti C, Marconi P, Andreoni M, Angarano G, Bonora S, Castagna A, Cauda R, Clerici M, Monforte Ad, De Luca A, Di Perri G, Galli M, Girardi E, Gori A, Lazzarin A, Lo Caputo S, Mazzotta F, Montella F, Mussini C, Perno CF, Puoti M, Rizzardini G, Rusconi S, Vullo V, Carosi G. Italian consensus statement on management of HIV-infected individuals with advanced disease

- naïve to antiretroviral therapy. *Infection* 2009;37:270-82.
11. Gandhi RT, Wurcel A, Lee H, McGovern B, Shopis J, Geary M, Sivamurthy R, Sax PE, Ukomadu C. Response to hepatitis B vaccine in HIV-1-positive subjects who test positive for isolated antibody to hepatitis B core antigen: implications for hepatitis B vaccine strategies. *J Infect Dis* 2005;191:1435-41.
  12. Kaplan JE, Benson C, Holmes KK, Brooks JT, Pau A, Masur H; Centers for Disease Control and Prevention (CDC); National Institutes of Health; HIV Medicine Association of the Infectious Diseases Society of America. Guidelines for prevention and treatment of opportunistic infections in HIV-infected adults and adolescents: recommendations from CDC, the National Institutes of Health, and the HIV Medicine Association of the Infectious Diseases Society of America. *MMWR Recomm Rep* 2009;58:1-207; quiz CE1-4.
  13. Schwarcz S, Hsu L, Dilley JW, Loeb L, Nelson K, Boyd S. Late diagnosis of HIV infection: trends, prevalence, and characteristics of persons whose HIV diagnosis occurred within 12 months of developing AIDS. *J Acquir Immune Defic Syndr* 2006;43:491-4.
  14. Battegay M, Fluckiger U, Hirschel B, Furrer H. Late presentation of HIV-infected individuals. *Antivir Ther* 2007;12:841-51.
  15. Palella FJ Jr, Baker RK, Moorman AC, Chmiel JS, Wood KC, Brooks JT, Holmberg SD; HIV Outpatient Study Investigators. Mortality in the highly active antiretroviral therapy era: changing causes of death and disease in the HIV outpatient study. *J Acquir Immune Defic Syndr* 2006;43:27-34.
  16. Mallal S1, Phillips E, Carosi G, Molina JM, Workman C, Tomazic J, Jägel-Guedes E, Rugina S, Kozyrev O, Cid JF, Hay P, Nolan D, Hughes S, Hughes A, Ryan S, Fitch N, Thorborn D, Benbow A; PREDICT-1 Study Team. HLA-B\*5701 screening for hypersensitivity to abacavir. *N Engl J Med* 2008;358:568-79.
  17. Park WB, Choe PG, Song KH, Lee S, Jang HC, Jeon JH, Park SW, Park MH, Oh MD, Choe KW. Should HLA-B\*5701 screening be performed in every ethnic group before starting abacavir? *Clin Infect Dis* 2009;48:365-7.
  18. Kim SJ, Equi R, Belair ML, Fine HF, Dunn JP. Long-term preservation of vision in progressive outer retinal necrosis treated with combination antiviral drugs and highly active antiretroviral therapy. *Ocul Immunol Inflamm* 2007;15:425-7.
  19. Saag M, Balu R, Phillips E, Brachman P, Martorell C, Burman W, Stancil B, Mosteller M, Brothers C, Wannamaker P, Hughes A, Sutherland-Phillips D, Mallal S, Shaefer M; Study of Hypersensitivity to Abacavir and Pharmacogenetic Evaluation Study Team. High sensitivity of human leukocyte antigen-b\*5701 as a marker for immunologically confirmed abacavir hypersensitivity in white and black patients. *Clin Infect Dis* 2008;46:1111-8.
  20. Hammer SM, Saag MS, Schechter M, Montaner JS, Schooler RT, Jacobsen DM, Thompson MA, Carpenter CC, Fischl MA, Gazzard BG, Gatell JM, Hirsch MS, Katzenstein DA, Richman DD, Vella S, Yeni PG, Volberding PA; International AIDS Society-USA panel. Treatment for adult HIV infection: 2006 recommendations of the International AIDS Society-USA panel. *JAMA* 2006;296:827-43.
  21. Bang JI, Song KH, Kim SH, Cho JH, Park WB, Park SW, Kim HB, Kim NJ, Oh MD, Choe KW. Prevalence of primary antiretroviral resistance: trends in Korea. *AIDS Res Hum Retroviruses* 2008;24:83-5.
  22. Song JY, Lee JS, Jung HW, Choi HJ, Lee JS, Lee J, Eom JS, Cheong HJ, Jung MH, Kim WJ. Primary anti-retroviral resistance in treatment-naïve HIV-infected patients: a Korean HIV/AIDS cohort study. *Infect Chemother* 2009;41:230-2.
  23. Kim SR, Rheu EK, Seol YM, Cha DH, Lee SJ, Yoon YK, Park SM, Kim HH, Rheu HS, Ahn SC, Lee SH, Kwak IS, Cho GJ. Antiretroviral drug resistance among drug-naïve HIV-1 infected patients. *Korean J Med* 2007;73:243-50.
  24. De Santis M, Cavaliere AF, Caruso A, Villa P, Tamburrini E, Cauda R, Fundaro C, Genovese O. Hemangiomas and other congenital malformations in infants exposed to antiretroviral therapy in utero. *JAMA* 2004;291:305.
  25. Fundarò C, Genovese O, Rendeli C, Tamburrini E, Salvaggio E. Myelomeningocele in a child with intrauterine exposure to efavirenz. *AIDS* 2002;16:299-300.
  26. Ledergerber B, Egger M, Erard V, Weber R, Hirschel B, Furrer H, Battegay M, Vernazza P, Bernasconi E, Opravil M, Kaufmann D, Sudre P, Francioli P, Telenti A. AIDS-related opportunistic illnesses occurring after initiation of potent antiretroviral therapy: the Swiss HIV Cohort Study. *JAMA* 1999;282:2220-6.
  27. Smit C, Gekus R, Walker S, Sabin C, Coutinho R, Porter K, Prins M; CASCADE Collaboration. Effective therapy has altered the spectrum of cause-specific mortality following HIV seroconversion. *AIDS* 2006;20:741-9.
  28. d'Arminio Monforte A, Sabin CA, Phillips A, Sterne J, May M, Justice A, Dabis F, Grabar S, Ledergerber B, Gill J, Reiss P, Egger M; Antiretroviral Therapy Cohort Collaboration. The changing incidence of AIDS events in patients receiv-

- ing highly active antiretroviral therapy. *Arch Intern Med* 2005;165:416-23.
29. Nunn P, Brindle R, Carpenter L, Odhiambo J, Wasunna K, Newnham R, Githui W, Gathua S, Omwega M, McAdam K. Cohort study of human immunodeficiency virus infection in patients with tuberculosis in Nairobi, Kenya. Analysis of early (6-month) mortality. *Am Rev Respir Dis* 1992;146:849-54.
  30. Verhofstede C, Wanzele FV, Van Der Gucht B, De Cabooter N, Plum J. Interruption of reverse transcriptase inhibitors or a switch from reverse transcriptase to protease inhibitors resulted in a fast reappearance of virus strains with a reverse transcriptase inhibitor-sensitive genotype. *AIDS* 1999;13:2541-6.
  31. Miller V, Sabin C, Hertogs K, Bloor S, Martinez-Picado J, D'Aquila R, Larder B, Lutz T, Gute P, Weidmann E, Rabenau H, Phillips A, Staszewski S. Virological and immunological effects of treatment interruptions in HIV-1 infected patients with treatment failure. *AIDS* 2000;14:2857-67.
  32. Devereux HL, Youle M, Johnson MA, Loveday C. Rapid decline in detectability of HIV-1 drug resistance mutations after stopping therapy. *AIDS* 1999;13:F123-7.
  33. Grulich AE, van Leeuwen MT, Falster MO, Vajdic CM. Incidence of cancers in people with HIV/AIDS compared with immunosuppressed transplant recipients: a meta-analysis. *Lancet* 2007;370:59-67.
  34. Long JL, Engels EA, Moore RD, Gebo KA. Incidence and outcomes of malignancy in the HAART era in an urban cohort of HIV-infected individuals. *AIDS* 2008;22:489-96.
  35. Patel P, Hanson DL, Sullivan PS, Novak RM, Moorman AC, Tong TC, Holmberg SD, Brooks JT; Adult and Adolescent Spectrum of Disease Project and HIV Outpatient Study Investigators. Incidence of types of cancer among HIV-infected persons compared with the general population in the United States, 1992-2003. *Ann Intern Med* 2008;148:728-36.
  36. DAD Study Group, Friis-Møller N, Reiss P, Sabin CA, Weber R, Monforte Ad, El-Sadr W, Thiébaud R, De Wit S, Kirk O, Fontas E, Law MG, Phillips A, Lundgren JD. Class of antiretroviral drugs and the risk of myocardial infarction. *N Engl J Med* 2007;356:1723-35.
  37. Gupta SK, Eustace JA, Winston JA, Boydston II, Ahuja TS, Rodriguez RA, Tashima KT, Roland M, Franceschini N, Palella FJ, Lennox JL, Klotman PE, Nachman SA, Hall SD, Szczech LA. Guidelines for the management of chronic kidney disease in HIV-infected patients: recommendations of the HIV Medicine Association of the Infectious Diseases Society of America. *Clin Infect Dis* 2005;40:1559-85.
  38. Choi AI, Rodriguez RA, Bacchetti P, Bertenthal D, Volberding PA, O'Hare AM. Racial differences in end-stage renal disease rates in HIV infection versus diabetes. *J Am Soc Nephrol* 2007;18:2968-74.
  39. Mocroft A, Vella S, Benfield TL, Chiesi A, Miller V, Gargalianos P, d'Arminio Monforte A, Yust I, Bruun JN, Phillips AN, Lundgren JD. Changing patterns of mortality across Europe in patients infected with HIV-1. EuroSIDA Study Group. *Lancet* 1998;352:1725-30.
  40. Hogg RS, Yip B, Chan KJ, Wood E, Craib KJ, O'Shaughnessy MV, Montaner JS. Rates of disease progression by baseline CD4 cell count and viral load after initiating triple-drug therapy. *JAMA* 2001;286:2568-77.
  41. Palella FJ Jr, Deloria-Knoll M, Chmiel JS, Moorman AC, Wood KC, Greenberg AE, Holmberg SD; HIV Outpatient Study Investigators. Survival benefit of initiating antiretroviral therapy in HIV-infected persons in different CD4+ cell strata. *Ann Intern Med* 2003;138:620-6.
  42. Baker JV, Peng G, Rapkin J, Abrams DI, Silverberg MJ, MacArthur RD, Cavert WP, Henry WK, Neaton JD; Terry Beinr Community Programs for Clinical Research on AIDS (CPCRA). CD4+ count and risk of non-AIDS diseases following initial treatment for HIV infection. *AIDS* 2008;22:841-8.
  43. When To Start Consortium, Sterne JA, May M, Costagliola D, de Wolf F, Phillips AN, Harris R, Funk MJ, Geskus RB, Gill J, Dabis F, Miró JM, Justice AC, Ledergerber B, Fätkenheuer G, Hogg RS, Monforte AD, Saag M, Smith C, Staszewski S, Egger M, Cole SR. Timing of initiation of antiretroviral therapy in AIDS-free HIV-1-infected patients: a collaborative analysis of 18 HIV cohort studies. *Lancet* 2009;373:1352-63.
  44. Severe P, Juste MA, Ambroise A, Eliacin L, Marchand C, Apollon S, Edwards A, Bang H, Nicotera J, Godfrey C, Gullick RM, Johnson WD Jr, Pape JW, Fitzgerald DW. Early versus standard antiretroviral therapy for HIV-infected adults in Haiti. *N Engl J Med* 2010;363:257-65.
  45. Strategies for Management of Antiretroviral Therapy (SMART) Study Group, Emery S, Neuhaus JA, Phillips AN, Babiker A, Cohen CJ, Gatell JM, Girard PM, Grund B, Law M, Losso MH, Palfreeman A, Wood R. Major clinical outcomes in antiretroviral therapy (ART)-naive participants and in those not receiving ART at baseline in the SMART study. *J Infect Dis* 2008;197:1133-44.

46. Kitahata MM, Gange SJ, Abraham AG, Merriman B, Saag MS, Justice AC, Hogg RS, Deeks SG, Eron JJ, Brooks JT, Rourke SB, Gill MJ, Bosch RJ, Martin JN, Klein MB, Jacobson LP, Rodriguez B, Sterling TR, Kirk GD, Napravnik S, Rachlis AR, Calzavara LM, Horberg MA, Silverberg MJ, Gebo KA, Goedert JJ, Benson CA, Collier AC, Van Rompaey SE, Crane HM, McKaig RG, Lau B, Freeman AM, Moore RD; NA-ACCORD Investigators. Effect of early versus deferred antiretroviral therapy for HIV on survival. *N Engl J Med* 2009;360:1815-26.
47. Writing Committee for the CASCADE Collaboration. Timing of HAART initiation and clinical outcomes in human immunodeficiency virus type 1 seroconverters. *Arch Intern Med* 2011;171:1560-9.
48. Cohen MS, Chen YQ, McCauley M, Gamble T, Hosseinipour MC, Kumarasamy N, Hakim JG, Kumwenda J, Grinsztejn B, Pilotto JH, Godbole SV, Mehendale S, Chariyalertsak S, Santos BR, Mayer KH, Hoffman IF, Eshleman SH, Piwowar-Manning E, Wang L, Makhema J, Mills LA, de Bruyn G, Sanne I, Eron J, Gallant J, Havlir D, Swindells S, Ribaud H, Elharrar V, Burns D, Taha TE, Nielsen-Saines K, Celentano D, Essex M, Fleming TR; HPTN 052 Study Team. Prevention of HIV-1 infection with early antiretroviral therapy. *N Engl J Med* 2011;365:493-505.
49. Hogan CM, Degruittola V, Sun X, Fiscus SA, Del Rio C, Hare CB, Markowitz M, Connick E, Macatangay B, Tashima KT, Kallungal B, Camp R, Morton T, Daar ES, Little S; A5217 Study Team. The setpoint study (ACTG A5217): effect of immediate versus deferred antiretroviral therapy on virologic set point in recently HIV-1-infected individuals. *J Infect Dis* 2012;205:87-96.
50. Hargrove JW, Humphrey JH; ZVITAMBO Study Group. Mortality among HIV-positive postpartum women with high CD4 cell counts in Zimbabwe. *AIDS* 2010;24:F11-4.
51. Szczech LA, Gupta SK, Habash R, Guasch A, Kalayjian R, Appel R, Fields TA, Svetkey LP, Flanagan KH, Klotman PE, Winston JA. The clinical epidemiology and course of the spectrum of renal diseases associated with HIV infection. *Kidney Int* 2004;66:1145-52.
52. Marras D, Bruggeman LA, Gao F, Tanji N, Mansukhani MM, Cara A, Ross MD, Gusella GL, Benson G, D'Agati VD, Hahn BH, Klotman ME, Klotman PE. Replication and compartmentalization of HIV-1 in kidney epithelium of patients with HIV-associated nephropathy. *Nat Med* 2002;8:522-6.
53. Estrella M, Fine DM, Gallant JE, Rahman MH, Nagajothi N, Racusen LC, Scheel PJ, Atta MG. HIV type 1 RNA level as a clinical indicator of renal pathology in HIV-infected patients. *Clin Infect Dis* 2006;43:377-80.
54. Atta MG, Gallant JE, Rahman MH, Nagajothi N, Racusen LC, Scheel PJ, Fine DM. Antiretroviral therapy in the treatment of HIV-associated nephropathy. *Nephrol Dial Transplant* 2006;21:2809-13.
55. Schwartz EJ, Szczech LA, Ross MJ, Klotman ME, Winston JA, Klotman PE. Highly active antiretroviral therapy and the epidemic of HIV+ end-stage renal disease. *J Am Soc Nephrol* 2005;16:2412-20.
56. Kalayjian RC, Franceschini N, Gupta SK, Szczech LA, Mupere E, Bosch RJ, Smurzynski M, Albert JM. Suppression of HIV-1 replication by antiretroviral therapy improves renal function in persons with low CD4 cell counts and chronic kidney disease. *AIDS* 2008;22:481-7.
57. Thein HH, Yi Q, Dore GJ, Krahn MD. Natural history of hepatitis C virus infection in HIV-infected individuals and the impact of HIV in the era of highly active antiretroviral therapy: a meta-analysis. *AIDS* 2008;22:1979-91.
58. Thio CL, Seaberg EC, Skolasky R Jr, Phair J, Visscher B, Muñoz A, Thomas DL; Multicenter AIDS Cohort Study. HIV-1, hepatitis B virus, and risk of liver-related mortality in the Multicenter Cohort Study (MACS). *Lancet* 2002;360:1921-6.
59. Macías J, Berenguer J, Japón MA, Girón JA, Rivero A, López-Cortés LF, Moreno A, González-Serrano M, Iribarren JA, Ortega E, Miralles P, Mira JA, Pineda JA. Fast fibrosis progression between repeated liver biopsies in patients coinfecting with human immunodeficiency virus/hepatitis C virus. *Hepatology* 2009;50:1056-63.
60. Verma S, Goldin RD, Main J. Hepatic steatosis in patients with HIV-Hepatitis C Virus coinfection: is it associated with antiretroviral therapy and more advanced hepatic fibrosis? *BMC Res Notes* 2008;1:46.
61. Ragni MV, Nalesnik MA, Schillo R, Dang Q. Highly active antiretroviral therapy improves ESLD-free survival in HIV-HCV co-infection. *Haemophilia* 2009;15:552-8.
62. Matthews GV, Avihingsanon A, Lewin SR, Amin J, Rekrnimitr R, Petcharapirat P, Marks P, Sasadeusz J, Cooper DA, Bowden S, Locarnini S, Ruxrungtham K, Dore GJ. A randomized trial of combination hepatitis B therapy in HIV/HBV coinfecting antiretroviral naive individuals in Thailand. *Hepatology* 2008;48:1062-9.
63. Peters MG, Andersen J, Lynch P, Liu T, Alston-Smith B, Brosgart CL, Jacobson JM, Johnson VA, Pollard RB, Rooney JF, Sherman KE, Swindells S, Polsky B; ACTG Protocol A5127 Team. Randomized controlled study of teno-

- fovir and adefovir in chronic hepatitis B virus and HIV infection: ACTG A5127. *Hepatology* 2006;44:1110-6.
64. Clotet B, Bellos N, Molina JM, Cooper D, Goffard JC, Lazarin A, Wöhrmann A, Katlama C, Wilkin T, Haubrich R, Cohen C, Farthing C, Jayaweera D, Markowitz M, Ruane P, Spinosa-Guzman S, Lefebvre E; POWER 1 and 2 study groups. Efficacy and safety of darunavir-ritonavir at week 48 in treatment-experienced patients with HIV-1 infection in POWER 1 and 2: a pooled subgroup analysis of data from two randomised trials. *Lancet* 2007;369:1169-78.
  65. Avidan NU, Goldstein D, Rozenberg L, McLaughlin M, Ferenci P, Masur H, Buti M, Fauci AS, Polis MA, Kottlil S. Hepatitis C viral kinetics during treatment with peg IFN-alpha-2b in HIV/HCV coinfecting patients as a function of baseline CD4+ T-cell counts. *J Acquir Immune Defic Syndr* 2009;52:452-8.
  66. Hammer SM, Eron JJ Jr, Reiss P, Schooley RT, Thompson MA, Walmsley S, Cahn P, Fischl MA, Gatell JM, Hirsch MS, Jacobsen DM, Montaner JS, Richman DD, Yeni PG, Volberding PA; International AIDS Society-USA. Antiretroviral treatment of adult HIV infection: 2008 recommendations of the International AIDS Society-USA panel. *JAMA* 2008;300:555-70.
  67. Zeng M, Southern PJ, Reilly CS, Beilman GJ, Chipman JG, Schacker TW, Haase AT. Lymphoid tissue damage in HIV-1 infection depletes naïve T cells and limits T cell reconstitution after antiretroviral therapy. *PLoS Pathog* 2012;8:e1002437.
  68. Gianella S, von Wyl V, Fischer M, Niederoest B, Battegay M, Bernasconi E, Cavassini M, Rauch A, Hirschel B, Vernazza P, Weber R, Joos B, Günthard HF; Swiss HIV Cohort Study. Effect of early antiretroviral therapy during primary HIV-1 infection on cell-associated HIV-1 DNA and plasma HIV-1 RNA. *Antivir Ther* 2011;16:535-45.
  69. Wyl V, Gianella S, Fischer M, Niederoest B, Kuster H, Battegay M, Bernasconi E, Cavassini M, Rauch A, Hirschel B, Vernazza P, Weber R, Joos B, Günthard HF; Swiss HIV Cohort Study-SHCS. Early antiretroviral therapy during primary HIV-1 infection results in a transient reduction of the viral setpoint upon treatment interruption. *PLoS One* 2011;6:e27463.
  70. Grijzen ML, Steingrover R, Wit FW, Jurriaans S, Verbon A, Brinkman K, van der Ende ME, Soetekouw R, de Wolf F, Lange JM, Schuitemaker H, Prins JM; Primo-SHM Study Group. No treatment versus 24 or 60 weeks of antiretroviral treatment during primary HIV infection: the randomized Primo-SHM trial. *PLoS Med* 2012;9:e1001196.
  71. Strategies for Management of Antiretroviral Therapy (SMART) Study Group1, El-Sadr WM, Lundgren J, Neaton JD, Gordin F, Abrams D, Arduino RC, Babiker A, Burman W, Clumeck N, Cohen CJ, Cohn D, Cooper D, Darbyshire J, Emery S, Fätkenheuer G, Gazzard B, Grund B, Hoy J, Klingman K, Losso M, Markowitz N, Neuhaus J, Phillips A, Rappoport C. CD4+ count-guided interruption of antiretroviral treatment. *N Engl J Med* 2006;355:2283-96.
  72. Kim SB, Kim YC, Kim MH, Song JE, Oh DH, Ahn JY, Ku NS, Kim HW, Jeong SJ, Han SH, Song YG, Choi JY, Kim JM. A comparison of the predicted risk for cardiovascular disease between HIV-infected and uninfected persons in Korea. *Scand J Infect Dis* 2013;45:855-62.
  73. Arribas JR, Pozniak AL, Gallant JE, DeJesus E, Gazzard B, Campo RE, Chen SS, McColl D, Holmes CB, Enejosa J, Toole JJ, Cheng AK. Tenofovir disoproxil fumarate, emtricitabine, and efavirenz compared with zidovudine/lamivudine and efavirenz in treatment-naïve patients: 144-week analysis. *J Acquir Immune Defic Syndr* 2008;47:74-8.
  74. Sax PE, Tierney C, Collier AC, Fischl MA, Mollan K, Peoples L, Godfrey C, Jahed NC, Myers L, Katzenstein D, Farajallah A, Rooney JF, Ha B, Woodward WC, Koletar SL, Johnson VA, Geiseler PJ, Daar ES; AIDS Clinical Trials Group Study A5202 Team. Abacavir-lamivudine versus tenofovir-emtricitabine for initial HIV-1 therapy. *N Engl J Med* 2009;361:2230-40.
  75. Smith KY, Patel P, Fine D, Bellos N, Sloan L, Lackey P, Kumar PN, Sutherland-Phillips DH, Vavro C, Yau L, Wannamaker P, Shaefer MS; HEAT Study Team. Randomized, double-blind, placebo-matched, multicenter trial of abacavir/lamivudine or tenofovir/emtricitabine with lopinavir/ritonavir for initial HIV treatment. *AIDS* 2009;23:1547-56.
  76. Molina JM, Podsiadecki TJ, Johnson MA, Wilkin A, Domingo P, Myers R, Hairrell JM, Rode RA, King MS, Hanna GJ. A lopinavir/ritonavir-based once-daily regimen results in better compliance and is non-inferior to a twice-daily regimen through 96 weeks. *AIDS Res Hum Retroviruses* 2007;23:1505-14.
  77. Smith KY, Weinberg WG, DeJesus E, Fischl MA, Liao Q, Ross LL, Pakes GE, Pappa KA, Lancaster CT; ALERT (COL103952) Study Team. Fosamprenavir or atazanavir once daily boosted with ritonavir 100 mg, plus tenofovir/emtricitabine, for the initial treatment of HIV infection: 48-week results of ALERT. *AIDS Res Ther* 2008;5:5.
  78. DeJesus E, Rockstroh JK, Lennox JL, Saag MS, Lazzarin A, Zhao J, Wan H, Rodgers AJ, Walker ML, Miller M, DiNubile

- MJ, Nguyen BY, Tepler H, Leavitt R, Sklar P; STARTMRK Investigators. Efficacy of raltegravir versus efavirenz when combined with tenofovir/emtricitabine in treatment-naive HIV-1-infected patients: week-192 overall and subgroup analyses from STARTMRK. *HIV Clin Trials* 2012;13:228-32.
79. Rockstroh JK, DeJesus E, Lennox JL, Yazdanpanah Y, Saag MS, Wan H, Rodgers AJ, Walker ML, Miller M, DiNubile MJ, Nguyen BY, Tepler H, Leavitt R, Sklar P; STARTMRK Investigators. Durable efficacy and safety of raltegravir versus efavirenz when combined with tenofovir/emtricitabine in treatment-naive HIV-1-infected patients: final 5-year results from STARTMRK. *J Acquir Immune Defic Syndr* 2013;63:77-85.
80. Rockstroh JK, Lennox JL, DeJesus E, Saag MS, Lazzarin A, Wan H, Walker ML, Xu X, Zhao J, Tepler H, Dinubile MJ, Rodgers AJ, Nguyen BY, Leavitt R, Sklar P; STARTMRK Investigators. Long-term treatment with raltegravir or efavirenz combined with tenofovir/emtricitabine for treatment-naive human immunodeficiency virus-1-infected patients: 156-week results from STARTMRK. *Clin Infect Dis* 2011;53:807-16.
81. Lennox JL, DeJesus E, Lazzarin A, Pollard RB, Madruga JV, Berger DS, Zhao J, Xu X, Williams-Diaz A, Rodgers AJ, Barnard RJ, Miller MD, DiNubile MJ, Nguyen BY, Leavitt R, Sklar P; STARTMRK investigators. Safety and efficacy of raltegravir-based versus efavirenz-based combination therapy in treatment-naive patients with HIV-1 infection: a multicentre, double-blind randomised controlled trial. *Lancet* 2009;374:796-806.
82. Sax PE, DeJesus E, Mills A, Zolopa A, Cohen C, Wohl D, Gallant JE, Liu HC, Zhong L, Yale K, White K, Kearney BP, Szwarcberg J, Quirk E, Cheng AK; GS-US-236-0102 study team. Co-formulated elvitegravir, cobicistat, emtricitabine, and tenofovir versus co-formulated efavirenz, emtricitabine, and tenofovir for initial treatment of HIV-1 infection: a randomised, double-blind, phase 3 trial, analysis of results after 48 weeks. *Lancet* 2012;379:2439-48.
83. DeJesus E, Rockstroh JK, Henry K, Molina JM, Gathe J, Ramanathan S, Wei X, Yale K, Szwarcberg J, White K, Cheng AK, Kearney BP; GS-236-0103 Study Team. Co-formulated elvitegravir, cobicistat, emtricitabine, and tenofovir disoproxil fumarate versus ritonavir-boosted atazanavir plus co-formulated emtricitabine and tenofovir disoproxil fumarate for initial treatment of HIV-1 infection: a randomised, double-blind, phase 3, non-inferiority trial. *Lancet* 2012;379:2429-38.
84. Molina JM, Andrade-Villanueva J, Echevarria J, Chetchotisakd P, Corral J, David N, Moyle G, Mancini M, Percival L, Yang R, Thiry A, McGrath D; CASTLE Study Team. Once-daily atazanavir/ritonavir versus twice-daily lopinavir/ritonavir, each in combination with tenofovir and emtricitabine, for management of antiretroviral-naive HIV-1-infected patients: 48 week efficacy and safety results of the CASTLE study. *Lancet* 2008;372:646-55.
85. Ortiz R, DeJesus E, Khanlou H, Voronin E, van Lunzen J, Andrade-Villanueva J, Fourie J, De Meyer S, De Pauw M, Lefebvre E, Vangeneugden T, Spinosa-Guzman S. Efficacy and safety of once-daily darunavir/ritonavir versus lopinavir/ritonavir in treatment-naive HIV-1-infected patients at week 48. *AIDS* 2008;22:1389-97.
86. Nelson MR, Elion RA, Cohen CJ, Mills A, Hodder SL, Segal-Maurer S, Bloch M, Garner W, Guyer B, Williams S, Chuck S, Vanveggel S, Deckx H, Stevens M. Rilpivirine versus efavirenz in HIV-1-infected subjects receiving emtricitabine/tenofovir DF: pooled 96-week data from ECHO and THRIVE Studies. *HIV Clin Trials* 2013;14:81-91.
87. Molina JM, Cahn P, Grinsztejn B, Lazzarin A, Mills A, Saag M, Supparatpinyo K, Walmsley S, Crauwels H, Rimsky LT, Vanveggel S, Boven K; ECHO study group. Rilpivirine versus efavirenz with tenofovir and emtricitabine in treatment-naive adults infected with HIV-1 (ECHO): a phase 3 randomised double-blind active-controlled trial. *Lancet* 2011;378:238-46.
88. Zimmermann AE, Pizzoferrato T, Bedford J, Morris A, Hoffman R, Braden G. Tenofovir-associated acute and chronic kidney disease: a case of multiple drug interactions. *Clin Infect Dis* 2006;42:283-90.
89. Karras A, Lafaurie M, Furco A, Bourgarit A, Droz D, Sereni D, Legendre C, Martinez F, Molina JM. Tenofovir-related nephrotoxicity in human immunodeficiency virus-infected patients: three cases of renal failure, Fanconi syndrome, and nephrogenic diabetes insipidus. *Clin Infect Dis* 2003;36:1070-3.
90. Piscitelli S, Kim J, Gould E, Lou Y, White S, de Serres M, Johnson M, Zhou XJ, Pietropaolo K, Mayers D. Drug interaction profile for GSK2248761, a next generation non-nucleoside reverse transcriptase inhibitor. *Br J Clin Pharmacol* 2012;74:336-45.
91. Kiser JJ, Carten ML, Aquilante CL, Anderson PL, Wolfe P, King TM, Delahunty T, Bushman LR, Fletcher CV. The effect of lopinavir/ritonavir on the renal clearance of tenofovir in HIV-infected patients. *Clin Pharmacol Ther* 2008;83:265-72.

92. Gallant JE, Moore RD. Renal function with use of a tenofovir-containing initial antiretroviral regimen. *AIDS* 2009;23:1971-5.
93. Goicoechea M, Liu S, Best B, Sun S, Jain S, Kemper C, Witt M, Diamond C, Haubrich R, Louie S; California Collaborative Treatment Group 578 Team. Greater tenofovir-associated renal function decline with protease inhibitor-based versus nonnucleoside reverse-transcriptase inhibitor-based therapy. *J Infect Dis* 2008;197:102-8.
94. Molina JM, Andrade-Villanueva J, Echevarria J, Chetchotisakd P, Corral J, David N, Moyle G, Mancini M, Percival L, Yang R, Wirtz V, Lataillade M, Absalon J, McGrath D; CASTLE Study Team. Once-daily atazanavir/ritonavir compared with twice-daily lopinavir/ritonavir, each in combination with tenofovir and emtricitabine, for management of antiretroviral-naïve HIV-1-infected patients: 96-week efficacy and safety results of the CASTLE study. *J Acquir Immune Defic Syndr* 2010;53:323-32.
95. Mills AM, Nelson M, Jayaweera D, Ruxrungtham K, Cassetti I, Girard PM, Workman C, Dierynck I, Sekar V, Abeele CV, Lavreys L. Once-daily darunavir/ritonavir vs. lopinavir/ritonavir in treatment-naïve, HIV-1-infected patients: 96-week analysis. *AIDS* 2009;23:1679-88.
96. Nishijima T, Gatanaga H, Komatsu H, Tsukada K, Shimbo T, Aoki T, Watanabe K, Kinai E, Honda H, Tanuma J, Yazaki H, Honda M, Teruya K, Kikuchi Y, Oka S. Renal function declines more in tenofovir- than abacavir-based antiretroviral therapy in low-body weight treatment-naïve patients with HIV infection. *PLoS One* 2012;7:e29977.
97. Gervasoni C, Meraviglia P, Landonio S, Baldelli S, Fucile S, Castagnoli L, Clementi E, Riva A, Galli M, Rizzardini G, Cattaneo D. Low body weight in females is a risk factor for increased tenofovir exposure and drug-related adverse events. *PLoS One* 2013;8:e80242.
98. McComsey GA, Kitch D, Daar ES, Tierney C, Jahed NC, Tebas P, Myers L, Melbourne K, Ha B, Sax PE. Bone mineral density and fractures in antiretroviral-naïve persons randomized to receive abacavir-lamivudine or tenofovir disoproxil fumarate-emtricitabine along with efavirenz or atazanavir-ritonavir: Aids Clinical Trials Group A5224s, a substudy of ACTG A5202. *J Infect Dis* 2011;203:1791-801.
99. Stellbrink HJ, Orkin C, Arribas JR, Compston J, Gerstoft J, Van Wijngaerden E, Lazzarin A, Rizzardini G, Sprenger HG, Lambert J, Sture G, Leather D, Hughes S, Zucchi P, Pearce H; ASSERT Study Group. Comparison of changes in bone density and turnover with abacavir-lamivudine versus tenofovir-emtricitabine in HIV-infected adults: 48-week results from the ASSERT study. *Clin Infect Dis* 2010;51:963-72.
100. Bedimo R, Maalouf NM, Zhang S, Drechsler H, Tebas P. Osteoporotic fracture risk associated with cumulative exposure to tenofovir and other antiretroviral agents. *AIDS* 2012;26:825-31.
101. Mallal S, Nolan D, Witt C, Masel G, Martin AM, Moore C, Sayer D, Castley A, Mamotte C, Maxwell D, James I, Christiansen FT. Association between presence of HLA-B\*5701, HLA-DR7, and HLA-DQ3 and hypersensitivity to HIV-1 reverse-transcriptase inhibitor abacavir. *Lancet* 2002;359:727-32.
102. Ko SJ, Heo ST, Kim JS, Kim YR, Kim JW. A case of hypersensitivity reaction induced by abacavir in an AIDS patient. *Korean J Med* 2012;83:136-40.
103. To SW, Chen JH, Wong KH, Chan KC, Tsang OT, Yam WC. HLA-B\*5701 genetic screening among HIV-1 infected patients in Hong Kong: is this a practical approach in Han-Chinese? *Int J STD AIDS* 2013;24:50-2.
104. Henry K. Report from the 17th Conference on Retroviruses and Opportunistic Infections. More data and answers from ACTG 5202. *J Watch AIDS Clin Care* 2010;22:30.
105. D:A:D Study Group, Sabin CA, Worm SW, Weber R, Reiss P, El-Sadr W, Dabis F, De Wit S, Law M, D'Arminio Monforte A, Friis-Møller N, Kirk O, Pradier C, Weller I, Phillips AN, Lundgren JD. Use of nucleoside reverse transcriptase inhibitors and risk of myocardial infarction in HIV-infected patients enrolled in the D:A:D study: a multi-cohort collaboration. *Lancet* 2008;371:1417-26.
106. Strategies for Management of Anti-Retroviral Therapy/INSIGHT1; DAD Study Groups. Use of nucleoside reverse transcriptase inhibitors and risk of myocardial infarction in HIV-infected patients. *AIDS* 2008;22:F17-24.
107. Worm SW, Sabin C, Weber R, Reiss P, El-Sadr W, Dabis F, De Wit S, Law M, Monforte AD, Friis-Møller N, Kirk O, Fontas E, Weller I, Phillips A, Lundgren J. Risk of myocardial infarction in patients with HIV infection exposed to specific individual antiretroviral drugs from the 3 major drug classes: the data collection on adverse events of anti-HIV drugs (D:A:D) study. *J Infect Dis* 2010;201:318-30.
108. Ding X, Andraca-Carrera E, Cooper C, Miele P, Kornegay C, Soukup M, Marcus KA. No association of abacavir use with myocardial infarction: findings of an FDA meta-analysis. *J Acquir Immune Defic Syndr* 2012;61:441-7.
109. Lang S, Mary-Krause M, Cotte L, Gilquin J, Partisani M, Simon A, Boccara F, Costagliola D; Clinical Epidemiology

- Group of the French Hospital Database on HIV. Impact of individual antiretroviral drugs on the risk of myocardial infarction in human immunodeficiency virus-infected patients: a case-control study nested within the French Hospital Database on HIV ANRS cohort CO4. *Arch Intern Med* 2010;170:1228-38.
110. Sax PE, Tierney C, Collier AC, Daar ES, Mollan K, Budhathoki C, Godfrey C, Jahed NC, Myers L, Katzenstein D, Farajallah A, Rooney JF, Ha B, Woodward WC, Feinberg J, Tashima K, Murphy RL, Fischl MA; AIDS Clinical Trials Group Study A5202 Team. Abacavir/lamivudine versus tenofovir DF/emtricitabine as part of combination regimens for initial treatment of HIV: final results. *J Infect Dis* 2011;204:1191-201.
111. DeJesus E, Herrera G, Teofilo E, Gerstoft J, Buendia CB, Brand JD, Brothers CH, Hernandez J, Castillo SA, Bonny T, Lanier ER, Scott TR; CNA30024 Study Team. Abacavir versus zidovudine combined with lamivudine and efavirenz, for the treatment of antiretroviral-naive HIV-infected adults. *Clin Infect Dis* 2004;39:1038-46.
112. Campbell TB, Smeaton LM, Kumarasamy N, Flanigan T, Klingman KL, Firnhaber C, Grinsztejn B, Hosseinipour MC, Kumwenda J, Lalloo U, Riviere C, Sanchez J, Melo M, Supparatpinyo K, Tripathy S, Martinez AI, Nair A, Walawander A, Moran L, Chen Y, Snowden W, Rooney JF, Uy J, Schooley RT, De Gruttola V, Hakim JG; PEARLS study team of the ACTG. Efficacy and safety of three antiretroviral regimens for initial treatment of HIV-1: a randomized clinical trial in diverse multinational settings. *PLoS Med* 2012;9:e1001290.
113. Monforte Ad, Reiss P, Ryom L, El-Sadr W, Dabis F, De Wit S, Worm SW, Law MG, Weber R, Kirk O, Pradier C, Phillips AN, Lundgren JD, Sabin CA. Atazanavir is not associated with an increased risk of cardio- or cerebrovascular disease events. *AIDS* 2013;27:407-15.
114. Orkin C, DeJesus E, Khanlou H, Stoehr A, Supparatpinyo K, Lathouwers E, Lefebvre E, Opsomer M, Van de Castele T, Tomaka F. Final 192-week efficacy and safety of once-daily darunavir/ritonavir compared with lopinavir/ritonavir in HIV-1-infected treatment-naive patients in the ARTEMIS trial. *HIV Med* 2013;14:49-59.
115. Nelson M, Girard PM, Demasi R, Chen L, Smets E, Sekar V, Lavreys L. Suboptimal adherence to darunavir/ritonavir has minimal effect on efficacy compared with lopinavir/ritonavir in treatment-naive, HIV-infected patients: 96 week ARTEMIS data. *J Antimicrob Chemother* 2010;65:1505-9.
116. Janssen Pharmaceuticals Inc. Prezista Prescribing Information. Available at: [http://www.prezista.com/sites/default/files/pdf/us\\_package\\_insert.pdf#zoom=100](http://www.prezista.com/sites/default/files/pdf/us_package_insert.pdf#zoom=100). Accessed Date 4 September 2014.
117. Chan-Tack KM, Truffa MM, Struble KA, Birnkrant DB. Atazanavir-associated nephrolithiasis: cases from the US Food and Drug Administration's Adverse Event Reporting System. *AIDS* 2007;21:1215-8.
118. Rockwood N, Mandalia S, Bower M, Gazzard B, Nelson M. Ritonavir-boosted atazanavir exposure is associated with an increased rate of renal stones compared with efavirenz, ritonavir-boosted lopinavir and ritonavir-boosted darunavir. *AIDS* 2011;25:1671-3.
119. Hamada Y, Nishijima T, Watanabe K, Komatsu H, Tsukada K, Teruya K, Gatanaga H, Kikuchi Y, Oka S. High incidence of renal stones among HIV-infected patients on ritonavir-boosted atazanavir than in those receiving other protease inhibitor-containing antiretroviral therapy. *Clin Infect Dis* 2012;55:1262-9.
120. Rakotondravelo SI, Poinson Y, Borsa-Lebas F, de la Blanchardière A, Michau C, Jantzem H, Massy N, Polard E, Giroux F, Kerspern H, Meskar A, Hue G, Tribut O, Arvieux C, Tattevin P. Complicated atazanavir-associated cholelithiasis: a report of 14 cases. *Clin Infect Dis* 2012; 55:1270-2.
121. McGrath D, Uy J, Yang R, Thiry A, Mancini M, Absalon J, CASTLE Study Group. Efficacy and safety by racial group in ARV-naive subjects treated with atazanavir/ritonavir or lopinavir/ritonavir: 48-week results for the CASTLE study (AI424138). Abstract TUPE0058. 17th International AIDS Conference; 2008 Aug 3-8; Mexico City, Mexico.
122. Landovitz R, Ribaud H, Ofotokun I, Wang H, Baugh B, Leavitt R, Rooney J, Seekins D, Currier J, Lennox J. Efficacy and Tolerability of Atazanavir, Raltegravir, or Darunavir With FTC/Tenofovir: ACTG 5257. Abstract 85. 21th Conference on Retroviruses and Opportunistic Infections; 2014 March 3-6; Boston, Massachusetts.
123. Bristol-Myers Squibb. Reyataz Prescribing Information. Available at: [http://packageinserts.bms.com/pi/pi\\_reyataz.pdf](http://packageinserts.bms.com/pi/pi_reyataz.pdf). Accessed Date 4 September 2014.
124. Riddler SA, Haubrich R, DiRienzo AG, Peeples L, Powderly WG, Klingman KL, Garren KW, George T, Rooney JF, Brizz B, Lalloo UG, Murphy RL, Swindells S, Havlir D, Mellors JW; AIDS Clinical Trials Group Study A5142 Team. Class-sparing regimens for initial treatment of HIV-1 infection. *N Engl J Med* 2008;358:2095-106.
125. Haubrich RH, Riddler SA, DiRienzo AG, Komarow L,



- Powderly WG, Klingman K, Garren KW, Butcher DL, Rooney JF, Haas DW, Mellors JW, Havlir DV; AIDS Clinical Trials Group (ACTG) A5142 Study Team. Metabolic outcomes in a randomized trial of nucleoside, nonnucleoside and protease inhibitor-sparing regimens for initial HIV treatment. *AIDS* 2009;23:1109-18.
126. Gathe J, da Silva BA, Cohen DE, Loutfy MR, Podzamczek D, Rubio R, Gibbs S, Marsh T, Naylor C, Fredrick L, Bernstein B. A once-daily lopinavir/ritonavir-based regimen is noninferior to twice-daily dosing and results in similar safety and tolerability in antiretroviral-naive subjects through 48 weeks. *J Acquir Immune Defic Syndr* 2009;50:474-81.
  127. Zajdenverg R, Podsadecki TJ, Badal-Faesens S, Andrade-Villanueva J, Gathe J, Mingrone H, Fredrick LM, Gaultier IA, Woodward WC, Bernstein BM. Similar safety and efficacy of once- and twice-daily lopinavir/ritonavir tablets in treatment-experienced HIV-1-infected subjects at 48 weeks. *J Acquir Immune Defic Syndr* 2010;54:143-51.
  128. Ryom L, Mocroft A, Kirk O, Worm SW, Kamara DA, Reiss P, Ross M, Fux CA, Morlat P, Moranne O, Smith C, Lundgren JD; D:A:D Study Group. Association between antiretroviral exposure and renal impairment among HIV-positive persons with normal baseline renal function: the D:A:D study. *J Infect Dis* 2013;207:1359-69.
  129. Malan DR, Krantz E, David N, Wirtz V, Hammond J, McGrath D; 089 Study Group. Efficacy and safety of atazanavir, with or without ritonavir, as part of once-daily highly active antiretroviral therapy regimens in antiretroviral-naive patients. *J Acquir Immune Defic Syndr* 2008;47:161-7.
  130. Horberg M, Klein D, Hurley L, Silverberg M, Towner W, Antoniskis D, Kovach D, Mogyoros M, Blake W, Dobrinich R, Dodge W. Efficacy and safety of ritonavir-boosted and unboosted atazanavir among antiretroviral-naïve patients. *HIV Clin Trials* 2008;9:367-74.
  131. Santoro MM, Bertoli A, Lorenzini P, Lazzarin A, Esposito R, Carosi G, Di Perri G, Filice G, Moroni M, Rizzardini G, Caramello P, Maserati R, Narciso P, Cargnel A, Antinori A, Perno CF; CARE Study Group. Viro-immunologic response to ritonavir-boosted or unboosted atazanavir in a large cohort of multiply treated patients: the CARE Study. *AIDS Patient Care STDS* 2008;22:7-16.
  132. Lockman S, Hughes MD, McIntyre J, Zheng Y, Chipato T, Conradie F, Sawe F, Asmelash A, Hosseinipour MC, Mhambi L, Stringer E, Mngqibisa R, Siika A, Atwine D, Hakim J, Shaffer D, Kanyama C, Wools-Kaloustian K, Salata RA, Hogg E, Alston-Smith B, Walawander A, Purcelle-Smith E, Eshleman S, Rooney J, Rahim S, Mellors JW, Schooley RT, Currier JS; OCTANE A5208 Study Team. Antiretroviral therapies in women after single-dose nevirapine exposure. *N Engl J Med* 2010;363:1499-509.
  133. Squires K, Lazzarin A, Gatell JM, Powderly WG, Pokrovskiy V, Delfraissy JF, Jemsek J, Rivero A, Rozenbaum W, Schrader S, Sension M, Vibhagool A, Thiry A, Giordano M. Comparison of once-daily atazanavir with efavirenz, each in combination with fixed-dose zidovudine and lamivudine, as initial therapy for patients infected with HIV. *J Acquir Immune Defic Syndr* 2004;36:1011-9.
  134. Cooper DA, Heera J, Goodrich J, Tawadrous M, Saag M, Dejesus E, Clumeck N, Walmsley S, Ting N, Coakley E, Reeves JD, Reyes-Teran G, Westby M, Van Der Ryst E, Ive P, Mohapi L, Mingrone H, Horban A, Hackman F, Sullivan J, Mayer H. Maraviroc versus efavirenz, both in combination with zidovudine-lamivudine, for the treatment of antiretroviral-naive subjects with CCR5-tropic HIV-1 infection. *J Infect Dis* 2010;201:803-13.
  135. van Leth F, Phanuphak P, Ruxrungtham K, Baraldi E, Miller S, Gazzard B, Cahn P, Laloo UG, van der Westhuizen IP, Malan DR, Johnson MA, Santos BR, Mulcahy F, Wood R, Levi GC, Reboredo G, Squires K, Cassetti I, Petit D, Raffi F, Katlama C, Murphy RL, Horban A, Dam JP, Hassink E, van Leeuwen R, Robinson P, Wit FW, Lange JM; 2NN Study team. Comparison of first-line antiretroviral therapy with regimens including nevirapine, efavirenz, or both drugs, plus stavudine and lamivudine: a randomised open-label trial, the 2NN Study. *Lancet* 2004;363:1253-63.
  136. Núñez M, Soriano V, Martín-Carbonero L, Barrios A, Barreiro P, Blanco F, García-Benayas T, González-Lahoz J. SENC (Spanish efavirenz vs. nevirapine comparison) trial: a randomized, open-label study in HIV-infected naive individuals. *HIV Clin Trials* 2002;3:186-94.
  137. Cohen CJ, Molina JM, Cahn P, Clotet B, Fourie J, Grinsztejn B, Wu H, Johnson MA, Saag M, Supparatpinyo K, Crauwels H, Lefebvre E, Rimsky LT, Vanveggel S, Williams P, Boven K; ECHO Study Group; THRIVE Study Group. Efficacy and safety of rilpivirine (TMC278) versus efavirenz at 48 weeks in treatment-naïve HIV-1-infected patients: pooled results from the phase 3 double-blind randomized ECHO and THRIVE Trials. *J Acquir Immune Defic Syndr* 2012;60:33-42.
  138. Cohen CJ, Molina JM, Cassetti I, Chetchotisakd P, Lazzarin A, Orkin C, Rhame F, Stellbrink HJ, Li T, Crauwels H,

- Rimsky L, Vanveggel S, Williams P, Boven K; ECHO, THRIVE study groups. Week 96 efficacy and safety of rilpivirine in treatment-naïve, HIV-1 patients in two Phase III randomized trials. *AIDS* 2013;27:939-50.
139. Ford N, Calmy A, Mofenson L. Safety of efavirenz in the first trimester of pregnancy: an updated systematic review and meta-analysis. *AIDS* 2011;25:2301-4.
140. Ford N, Mofenson L, Shubber Z, Calmy A, Andrieux-Meyer I, Vitoria M, Shaffer N, Renaud F. Safety of efavirenz in the first trimester of pregnancy: an updated systematic review and meta-analysis. *AIDS* 2014;28 (Suppl 2):S123-31.
141. Mollan KR, Smurzynski M, Eron JJ, Daar ES, Campbell TB, Sax PE, Gulick RM, Na L, O'Keefe L, Robertson KR, Tierney C. Association between efavirenz as initial therapy for HIV-1 infection and increased risk for suicidal ideation or attempted or completed suicide: an analysis of trial data. *Ann Intern Med* 2014;161:1-10.
142. Napolitano L, Paquet A, Petropoulos C, Whitcomb J, Rimsky L, Vingerhoets J, Picchio G, Haddad M. Impact of Genotypic Mutations on Phenotypic Susceptibility to Rilpivirine. Abstract H1-371. 51st Interscience Conference on Antimicrobial Agents and Chemotherapy; 2011 September 17-20; Chicago, Illinois.
143. Cohen CJ, Andrade-Villanueva J, Clotet B, Fourie J, Johnson MA, Ruxrungtham K, Wu H, Zorrilla C, Crauwels H, Rimsky LT, Vanveggel S, Boven K; THRIVE study group. Rilpivirine versus efavirenz with two background nucleoside or nucleotide reverse transcriptase inhibitors in treatment-naïve adults infected with HIV-1 (THRIVE): a phase 3, randomised, non-inferiority trial. *Lancet* 2011;378:229-37.
144. Macarthur RD. Clinical Trial Report: TMC278 (Rilpivirine) Versus Efavirenz as Initial Therapy in Treatment-Naïve, HIV-1-Infected Patients. *Curr Infect Dis Rep* 2011;13:1-3.
145. Molina JM, Clumeck N, Orkin C, Rimsky LT, Vanveggel S, Stevens M; ECHO and THRIVE Study Groups. Week 96 analysis of rilpivirine or efavirenz in HIV-1-infected patients with baseline viral load  $\leq 100\,000$  copies/mL in the pooled ECHO and THRIVE phase 3, randomized, double-blind trials. *HIV Med* 2014;15:57-62.
146. Molina JM, Clumeck N, Redant K, Rimsky L, Vanveggel S, Stevens M; ECHO Study Group; THRIVE Study Group. Rilpivirine vs. efavirenz in HIV-1 patients with baseline viral load 100,000 copies/ml or less: week 48 phase III analysis. *AIDS* 2013;27:889-97.
147. Behrens G, Rijnders B, Nelson M, Orkin C, Cohen C, Mills A, Elion RA, Vanveggel S, Stevens M, Rimsky L, Thorpe D, Bosse M, White K, Zhong L, DeMorin J, Chuck SK. Rilpivirine versus efavirenz with emtricitabine/tenofovir disoproxil fumarate in treatment-naïve HIV-1-infected patients with HIV-1 RNA  $\leq 100,000$  copies/mL: week 96 pooled ECHO/THRIVE subanalysis. *AIDS Patient Care STDS* 2014;28:168-75.
148. Cohen C. STaR study: single tablet regimen rilpivirine/emtricitabine/tenofovir DF has non-inferior efficacy compared to efavirenz/emtricitabine/tenofovir DF and improves patient reported outcomes. Abstract TUPE284. 7th IAS Conference on HIV Pathogenesis, Treatment and Prevention; 2013 Jun 30-Jul 3; Kuala Lumpur, Malaysia.
149. Lennox JL, Dejesus E, Berger DS, Lazzarin A, Pollard RB, Ramalho Madruga JV, Zhao J, Wan H, Gilbert CL, Teppler H, Rodgers AJ, Barnard RJ, Miller MD, Dinubile MJ, Nguyen BY, Leavitt R, Sklar P; STARTMRK Investigators. Raltegravir versus Efavirenz regimens in treatment-naïve HIV-1-infected patients: 96-week efficacy, durability, subgroup, safety, and metabolic analyses. *J Acquir Immune Defic Syndr* 2010;55:39-48.
150. Reynes J, Trinh R, Pulido F, Soto-Malave R, Gathe J, Qaish R, Tian M, Fredrick L, Podsadecki T, Norton M, Niluis A. Lopinavir/ritonavir combined with raltegravir or tenofovir/emtricitabine in antiretroviral-naïve subjects: 96-week results of the PROGRESS study. *AIDS Res Hum Retroviruses* 2013;29:256-65.
151. Bedimo RJ, Drechsler H, Jain M, Cutrell J, Zhang S, Li X, Farukhi I, Castanon R, Tebas P, Maalouf NM. The RADAR study: week 48 safety and efficacy of Raltegravir combined with boosted DARunavir compared to tenofovir/emtricitabine combined with boosted darunavir in antiretroviral-naïve patients. Impact on bone health. *PLoS One* 2014;9:e106221.
152. Gilead Sciences Inc. Stribild Prescribing Information. Available at: [http://www.gilead.com/~-/media/Files/pdfs/medicines/hiv/stribild/stribild\\_pi.pdf](http://www.gilead.com/~-/media/Files/pdfs/medicines/hiv/stribild/stribild_pi.pdf). Accessed Date 5 September 2014.
153. Wohl DA, Cohen C, Gallant JE, Mills A, Sax PE, Dejesus E, Zolopa A, Liu HC, Plummer A, White KL, Cheng AK, Rhee MS, Szwarcberg J; GS-US-236-0102 Study Team. A randomized, double-blind comparison of single-tablet regimen elvitegravir/cobicistat/emtricitabine/tenofovir DF versus single-tablet regimen efavirenz/emtricitabine/tenofovir DF for initial treatment of HIV-1 infection: analysis of week 144 results. *J Acquir Immune Defic Syndr*

- 2014;65:e118-20.
154. Clumeck N, Molina JM, Henry K, Gathe J, Rockstroh JK, DeJesus E, Wei X, White K, Fordyce MW, Rhee MS, Szwarcberg J; GS-236-0103 Study Team. A randomized, double-blind comparison of single-tablet regimen elvitegravir/cobicistat/emtricitabine/tenofovir DF vs ritonavir-boosted atazanavir plus emtricitabine/tenofovir DF for initial treatment of HIV-1 infection: analysis of week 144 results. *J Acquir Immune Defic Syndr* 2014;65:e121-4.
  155. Weber T, Trebst C, Frye S, Cinque P, Vago L, Sindic CJ, Schulz-Schaeffer WJ, Kretzschmar HA, Enzensberger W, Hunsmann G, Lüke W. Analysis of the systemic and intrathecal humoral immune response in progressive multifocal leukoencephalopathy. *J Infect Dis* 1997;176:250-4.
  156. Thompson MA, Aberg JA, Cahn P, Montaner JS, Rizzardini G, Telenti A, Gatell JM, Günthard HF, Hammer SM, Hirsch MS, Jacobsen DM, Reiss P, Richman DD, Volberding PA, Yeni P, Schooley RT; International AIDS Society-USA. Antiretroviral treatment of adult HIV infection: 2010 recommendations of the International AIDS Society-USA panel. *JAMA* 2010;304:321-33.
  157. Ribaud H, Lennox J, Currier J. Virologic failure endpoint definition in clinical trials: Is using HIV-1 RNA threshold <200 copies/mL better than <50 copies/mL? An analysis of ACTG studies. 16th Conference on Retroviruses and Opportunistic Infections; Montreal, Canada 2009.
  158. Eron JJ, Cooper DA, Steigbigel RT, Clotet B, Gatell JM, Kumar PN, Rockstroh JK, Schechter M, Markowitz M, Yeni P, Loutfy MR, Lazzarin A, Lennox JL, Strohmaier KM, Wan H, Barnard RJ, Nguyen BY, Teppler H; BENCHMRK Study Teams. Efficacy and safety of raltegravir for treatment of HIV for 5 years in the BENCHMRK studies: final results of two randomised, placebo-controlled trials. *Lancet Infect Dis* 2013;13:587-96.
  159. Laprise C, de Pokomandy A, Baril JG, Dufresne S, Trottier H. Virologic failure following persistent low-level viremia in a cohort of HIV-positive patients: results from 12 years of observation. *Clin Infect Dis* 2013;57:1489-96.
  160. Nettles RE, Kieffer TL, Kwon P, Monie D, Han Y, Parsons T, Cofrancesco J Jr, Gallant JE, Quinn TC, Jackson B, Flexner C, Carson K, Ray S, Persaud D, Siliciano RF. Intermittent HIV-1 viremia (Blips) and drug resistance in patients receiving HAART. *JAMA* 2005;293:817-29.
  161. Lazzarin A, Clotet B, Cooper D, Reynes J, Arastéh K, Nelson M, Katlama C, Stellbrink HJ, Delfraissy JF, Lange J, Huson L, DeMasi R, Wat C, Delehanty J, Drobnes C, Salgo M; TORO 2 Study Group. Efficacy of enfuvirtide in patients infected with drug-resistant HIV-1 in Europe and Australia. *N Engl J Med* 2003;348:2186-95.
  162. Clotet B, Bellos N, Molina JM, Cooper D, Goffard JC, Lazzarin A, Wöhrmann A, Katlama C, Wilkin T, Haubrich R, Cohen C, Farthing C, Jayaweera D, Markowitz M, Ruane P, Spinosa-Guzman S, Lefebvre E; POWER 1 and 2 study groups. Efficacy and safety of darunavir-ritonavir at week 48 in treatment-experienced patients with HIV-1 infection in POWER 1 and 2: a pooled subgroup analysis of data from two randomised trials. *Lancet* 2007;369:1169-78.
  163. Cooper DA, Steigbigel RT, Gatell JM, Rockstroh JK, Katlama C, Yeni P, Lazzarin A, Clotet B, Kumar PN, Eron JE, Schechter M, Markowitz M, Loutfy MR, Lennox JL, Zhao J, Chen J, Ryan DM, Rhodes RR, Killar JA, Gilde LR, Strohmaier KM, Meibohm AR, Miller MD, Hazuda DJ, Nessly ML, DiNubile MJ, Isaacs RD, Teppler H, Nguyen BY; BENCHMRK Study Teams. Subgroup and resistance analyses of raltegravir for resistant HIV-1 infection. *N Engl J Med* 2008;359:355-65.
  164. Katlama C, Haubrich R, Lalezari J, Lazzarin A, Madruga JV, Molina JM, Schechter M, Peeters M, Picchio G, Vingerhoets J, Woodfall B, De Smedt G; DUET-1, DUET-2 study groups. Efficacy and safety of etravirine in treatment-experienced, HIV-1 patients: pooled 48 week analysis of two randomized, controlled trials. *AIDS* 2009;23:2289-300.
  165. Gulick RM, Lalezari J, Goodrich J, Clumeck N, DeJesus E, Horban A, Nadler J, Clotet B, Karlsson A, Wohlfeiler M, Montana JB, McHale M, Sullivan J, Ridgway C, Felstead S, Dunne MW, van der Ryst E, Mayer H; MOTIVATE Study Teams. Maraviroc for previously treated patients with R5 HIV-1 infection. *N Engl J Med* 2008;359:1429-41.
  166. Tashima K, Smeaton L, Andrade A. Omitting NRTI from ARV regimens is not inferior to adding NRTI in treatment-experienced HIV+ subjects failing a protease inhibitor regimen: The ACTG OPTIONS Study 20th Conference on Retroviruses and Opportunistic Infections; Atlanta GA2013.
  167. Murray JS, Elashoff MR, Iacono-Connors LC, Cvetkovich TA, Struble KA. The use of plasma HIV RNA as a study endpoint in efficacy trials of antiretroviral drugs. *AIDS* 1999;13:797-804.
  168. Ledergerber B, Lundgren JD, Walker AS, Sabin C, Justice A, Reiss P, Mussini C, Wit F, d'Arminio Monforte A, Weber R, Fusco G, Staszewski S, Law M, Hogg R, Lampe F, Gill MJ, Castelli F, Phillips AN; PLATO Collaboration. Predic-

- tors of trend in CD4-positive T-cell count and mortality among HIV-1-infected individuals with virological failure to all three antiretroviral-drug classes. *Lancet* 2004;364: 51-62.
169. Raffanti SP, Fusco JS, Sherrill BH, Hansen NI, Justice AC, D'Aquila R, Mangialardi WJ, Fusco GP; Collaborations in HIV Outcomes Research/United States Project. Effect of persistent moderate viremia on disease progression during HIV therapy. *J Acquir Immune Defic Syndr* 2004; 37:1147-54.
170. Lau B, Gange SJ, Moore RD. Risk of non-AIDS-related mortality may exceed risk of AIDS-related mortality among individuals enrolling into care with CD4+ counts greater than 200 cells/mm<sup>3</sup>. *J Acquir Immune Defic Syndr* 2007;44:179-87.
171. Moore RD, Keruly JC. CD4+ cell count 6 years after commencement of highly active antiretroviral therapy in persons with sustained virologic suppression. *Clin Infect Dis* 2007;44:441-6.
172. Kaufmann GR, Perrin L, Pantaleo G, Opravil M, Furrer H, Telenti A, Hirschel B, Ledergerber B, Vernazza P, Bernasconi E, Rickenbach M, Egger M, Battegay M; Swiss HIV Cohort Study Group. CD4 T-lymphocyte recovery in individuals with advanced HIV-1 infection receiving potent antiretroviral therapy for 4 years: the Swiss HIV Cohort Study. *Arch Intern Med* 2003;163:2187-95.
173. Tarwater PM, Margolick JB, Jin J, Phair JP, Detels R, Rinaldo C, Giorgi J, Muñoz A. Increase and plateau of CD4 T-cell counts in the 3(1/2) years after initiation of potent antiretroviral therapy. *J Acquir Immune Defic Syndr* 2001;27:168-75.
174. Loutfy MR, Walmsley SL, Mullin CM, Perez G, Neaton JD; Terry Beinr Community Programs for Clinical Research on AIDS; Canada HIV Trials Network. CD4(+) cell count increase predicts clinical benefits in patients with advanced HIV disease and persistent viremia after 1 year of combination antiretroviral therapy. *J Infect Dis* 2005;192: 1407-11.
175. Monforte Ad, Abrams D, Pradier C, Weber R, Reiss P, Bonnet F, Kirk O, Law M, De Wit S, Friis-Møller N, Phillips AN, Sabin CA, Lundgren JD; Data Collection on Adverse Events of Anti-HIV Drugs (D:A:D) Study Group. HIV-induced immunodeficiency and mortality from AIDS-defining and non-AIDS-defining malignancies. *AIDS* 2008; 22:2143-53.
176. Ledergerber B, Egger M, Opravil M, Telenti A, Hirschel B, Battegay M, Vernazza P, Sudre P, Flepp M, Furrer H, Francioli P, Weber R. Clinical progression and virological failure on highly active antiretroviral therapy in HIV-1 patients: a prospective cohort study. *Swiss HIV Cohort Study. Lancet* 1999;353:863-8.
177. Konopnicki D, Mocroft A, de Wit S, Antunes F, Ledergerber B, Katlama C, Zilmer K, Vella S, Kirk O, Lundgren JD; EuroSIDA Group. Hepatitis B and HIV: prevalence, AIDS progression, response to highly active antiretroviral therapy and increased mortality in the EuroSIDA cohort. *AIDS* 2005;19:593-601.
178. Hoffmann CJ, Seaberg EC, Young S, Witt MD, D'Acunto K, Phair J, Thio CL. Hepatitis B and long-term HIV outcomes in coinfecting HAART recipients. *AIDS* 2009;23: 1881-9.
179. Dore GJ, Soriano V, Rockstroh J, Kupfer B, Tedaldi E, Peters L, Neuhaus J, Puoti M, Klein MB, Mocroft A, Clotet B, Lundgren JD; SMART INSIGHT study group. Frequent hepatitis B virus rebound among HIV-hepatitis B virus-coinfecting patients following antiretroviral therapy interruption. *AIDS* 2010;24:857-65.
180. Benhamou Y, Bochet M, Thibault V, Di Martino V, Caumes E, Bricaire F, Opolon P, Katlama C, Poynard T. Long-term incidence of hepatitis B virus resistance to lamivudine in human immunodeficiency virus-infected patients. *Hepatology* 1999;30:1302-6.
181. McMahon MA, Jilek BL, Brennan TP, Shen L, Zhou Y, Wind-Rotolo M, Xing S, Bhat S, Hale B, Hegarty R, Chong CR, Liu JO, Siliciano RF, Thio CL. The HBV drug entecavir - effects on HIV-1 replication and resistance. *N Engl J Med* 2007;356:2614-21.
182. Matthews GV, Seaberg E, Dore GJ, Bowden S, Lewin SR, Sasadeusz J, Marks P, Goodman Z, Philp FH, Tang Y, Locarnini S, Thio CL. Combination HBV therapy is linked to greater HBV DNA suppression in a cohort of lamivudine-experienced HIV/HBV coinfecting individuals. *AIDS* 2009;23:1707-15.
183. de Vries-Sluijs TE, Reijnders JG, Hansen BE, Zaaijer HL, Prins JM, Pas SD, Schutten M, Hoepelman AI, Richter C, Mulder JW, de Man RA, Janssen HL, van der Ende ME. Long-term therapy with tenofovir is effective for patients co-infected with human immunodeficiency virus and hepatitis B virus. *Gastroenterology* 2010;139:1934-41.
184. Pessôa MG, Gazzard B, Huang AK, Brandão-Mello CE, Cassetti I, Mendes-Corrêa MC, Soriano V, Phiri P, Hall A, Brett-Smith H. Efficacy and safety of entecavir for chronic HBV in HIV/HBV coinfecting patients receiving lamivudine as part of antiretroviral therapy. *AIDS* 2008;22:1779-

- 87.
185. Benhamou Y, Bochet M, Thibault V, Calvez V, Fievet MH, Vig P, Gibbs CS, Brosgart C, Fry J, Namini H, Katlama C, Poynard T. Safety and efficacy of adefovir dipivoxil in patients co-infected with HIV-1 and lamivudine-resistant hepatitis B virus: an open-label pilot study. *Lancet* 2001; 358:718-23.
186. Ingiliz P, Valantin MA, Thibault V, Duvivier C, Dominguez S, Katlama C, Poynard T, Benhamou Y. Efficacy and safety of adefovir dipivoxil plus pegylated interferon-alpha2a for the treatment of lamivudine-resistant hepatitis B virus infection in HIV-infected patients. *Antivir Ther* 2008;13: 895-900.
187. Manegold C, Hannoun C, Wywiol A, Dietrich M, Polywka S, Chiwakata CB, Günther S. Reactivation of hepatitis B virus replication accompanied by acute hepatitis in patients receiving highly active antiretroviral therapy. *Clin Infect Dis* 2001;32:144-8.
188. Sulkowski MS, Thomas DL, Chaisson RE, Moore RD. Hepatotoxicity associated with antiretroviral therapy in adults infected with human immunodeficiency virus and the role of hepatitis C or B virus infection. *JAMA* 2000; 283:74-80.
189. den Brinker M, Wit FW, Wertheim-van Dillen PM, Jurrjaans S, Weel J, van Leeuwen R, Pakker NG, Reiss P, Danner SA, Weverling GJ, Lange JM. Hepatitis B and C virus co-infection and the risk for hepatotoxicity of highly active antiretroviral therapy in HIV-1 infection. *AIDS* 2000;14:2895-902.
190. Alter MJ, Margolis HS, Krawczynski K, Judson FN, Mares A, Alexander WJ, Hu PY, Miller JK, Gerber MA, Sampliner RE, Meeks EL, Beach MJ; The Sentinel Counties Chronic non-A, non-B Hepatitis Study Team. The natural history of community-acquired hepatitis C in the United States. *N Engl J Med* 1992;327:1899-905.
191. Thomas DL, Astemborski J, Rai RM, Anania FA, Schaeffer M, Galai N, Nolt K, Nelson KE, Strathdee SA, Johnson L, Laeyendecker O, Boitnott J, Wilson LE, Vlahov D. The natural history of hepatitis C virus infection: host, viral, and environmental factors. *JAMA* 2000;284:450-6.
192. Poynard T, Bedossa P, Opolon P. Natural history of liver fibrosis progression in patients with chronic hepatitis C. The OBSVIRC, METAVIR, CLINIVIR, and DOSVIRC groups. *Lancet* 1997;349:825-32.
193. Wiley TE, McCarthy M, Breidi L, McCarthy M, Layden TJ. Impact of alcohol on the histological and clinical progression of hepatitis C infection. *Hepatology* 1998;28: 805-9.
194. Graham CS, Baden LR, Yu E, Mrus JM, Carnie J, Heeren T, Koziel MJ. Influence of human immunodeficiency virus infection on the course of hepatitis C virus infection: a meta-analysis. *Clin Infect Dis* 2001;33:562-9.
195. Sulkowski MS, Thomas DL. Hepatitis C in the HIV-infected patient. *Clin Liver Dis* 2003;7:179-94.
196. Hagan H, Jarlais DC, Friedman SR, Purchase D, Alter MJ. Reduced risk of hepatitis B and hepatitis C among injection drug users in the Tacoma syringe exchange program. *Am J Public Health* 1995;85:1531-7.
197. Hagan H, McGough JP, Thiede H, Weiss NS, Hopkins S, Alexander ER. Syringe exchange and risk of infection with hepatitis B and C viruses. *Am J Epidemiol* 1999;149: 203-13.
198. Vlahov D, Junge B, Brookmeyer R, Cohn S, Riley E, Armenian H, Beilenson P. Reductions in high-risk drug use behaviors among participants in the Baltimore needle exchange program. *J Acquir Immune Defic Syndr Hum Retrovirol* 1997;16:400-6.
199. Lambers FA, Brinkman K, Schinkel J, Spijkerman IJ, Moltenkamp R, Coutinho RA, Prins M, van der Meer JT; MO-SAIC (MSM Observational Study of Acute Infection with hepatitis C) study group. Treatment of acute hepatitis C virus infection in HIV-infected MSM: the effect of treatment duration. *AIDS* 2011;25:1333-6.
200. Piroth L, Larsen C, Biquet C, Alric L, Auperin I, Chaix ML, Dominguez S, Duval X, Gervais A, Ghosn J, Delarocque-Astagneau E, Pol S; Steering Committee of the HEPAIG Study. Treatment of acute hepatitis C in human immunodeficiency virus-infected patients: the HEPAIG study. *Hepatology* 2010;52:1915-21.
201. Grebely J, Petoumenos K, Hellard M, Matthews GV, Suppiah V, Applegate T, Yeung B, Marks P, Rawlinson W, Lloyd AR, Booth D, Kaldor JM, George J, Dore GJ; ATAHC Study Group. Potential role for interleukin-28B genotype in treatment decision-making in recent hepatitis C virus infection. *Hepatology* 2010;52:1216-24.
202. Dore GJ, Hellard M, Matthews GV, Grebely J, Haber PS, Petoumenos K, Yeung B, Marks P, van Beek I, McCaughan G, White P, French R, Rawlinson W, Lloyd AR, Kaldor JM; Australian Trial In Acute Hepatitis C Study Group. Effective treatment of injecting drug users with recently acquired hepatitis C virus infection. *Gastroenterology* 2010;138:123-35. e1-2.
203. Ge D, Fellay J, Thompson AJ, Simon JS, Shianna KV, Urban TJ, Heinzen EL, Qiu P, Bertelsen AH, Muir AJ, Sul-

- kowski M, McHutchison JG, Goldstein DB. Genetic variation in IL28B predicts hepatitis C treatment-induced viral clearance. *Nature* 2009;461:399-401.
204. Thomas DL, Thio CL, Martin MP, Qi Y, Ge D, O'Huigin C, Kidd J, Kidd K, Khakoo SI, Alexander G, Goedert JJ, Kirk GD, Donfield SM, Rosen HR, Tobler LH, Busch MP, McHutchison JG, Goldstein DB, Carrington M. Genetic variation in IL28B and spontaneous clearance of hepatitis C virus. *Nature* 2009;461:798-801.
205. Rauch A, Kotalik Z, Descombes P, Cai T, Di Iulio J, Mueller T, Bochud M, Battegay M, Bernasconi E, Borovicka J, Colombo S, Cerny A, Dufour JF, Furrer H, Günthard HF, Heim M, Hirschel B, Malinverni R, Moradpour D, Müllhaupt B, Witteck A, Beckmann JS, Berg T, Bergmann S, Negro F, Telenti A, Bochud PY; Swiss Hepatitis C Cohort Study; Swiss HIV Cohort Study. Genetic variation in IL28B is associated with chronic hepatitis C and treatment failure: a genome-wide association study. *Gastroenterology* 2010;138:1338-45, 1345.e1-7.
206. Ghany MG, Kleiner DE, Alter H, Doo E, Khokar F, Promrat K, Herion D, Park Y, Liang TJ, Hoofnagle JH. Progression of fibrosis in chronic hepatitis C. *Gastroenterology* 2003;124:97-104.
207. Sulkowski MS, Mehta SH, Torbenson MS, Higgins Y, Brinkley SC, de Oca RM, Moore RD, Afdhal NH, Thomas DL. Rapid fibrosis progression among HIV/hepatitis C virus-co-infected adults. *AIDS* 2007;21:2209-16.
208. Bräu N, Salvatore M, Ríos-Bedoya CF, Fernández-Carbia A, Paronetto F, Rodríguez-Orengo JF, Rodríguez-Torres M. Slower fibrosis progression in HIV/HCV-coinfected patients with successful HIV suppression using antiretroviral therapy. *J Hepatol* 2006;44:47-55.
209. Fleischer R, Boxwell D, Sherman KE. Nucleoside analogues and mitochondrial toxicity. *Clin Infect Dis* 2004;38:e79-80.
210. Alvarez D, Dieterich DT, Brau N, Moorehead L, Ball L, Sulkowski MS. Zidovudine use but not weight-based ribavirin dosing impacts anaemia during HCV treatment in HIV-infected persons. *J Viral Hepat* 2006;13:683-9.
211. Vispo E, Barreiro P, Pineda JA, Mira JA, Maida I, Martín-Carbonero L, Rodríguez-Nóvoa S, Santos I, López-Cortés LF, Merino D, Rivero A, Soriano V. Low response to pegylated interferon plus ribavirin in HIV-infected patients with chronic hepatitis C treated with abacavir. *Antivir Ther* 2008;13:429-37.
212. Laufer N, Laguno M, Perez I, Cifuentes C, Murillas J, Vidal F, Bonet L, Veloso S, Gatell JM, Mallolas J. Abacavir does not influence the rate of virological response in HIV-HCV-coinfected patients treated with pegylated interferon and weight-adjusted ribavirin. *Antivir Ther* 2008;13:953-7.
213. Mira JA, López-Cortés LF, Barreiro P, Tural C, Torres-Tortosa M, de Los Santos Gil I, Martín-Rico P, Ríos-Villegas MJ, Hernández-Burruezo JJ, Merino D, López-Ruz MA, Rivero A, Muñoz L, González-Serrano M, Collado A, Macías J, Viciano P, Soriano V, Pineda JA. Efficacy of pegylated interferon plus ribavirin treatment in HIV/hepatitis C virus co-infected patients receiving abacavir plus lamivudine or tenofovir plus either lamivudine or emtricitabine as nucleoside analogue backbone. *J Antimicrob Chemother* 2008;62:1365-73.
214. Aranzabal L, Casado JL, Moya J, Quereda C, Diz S, Moreno A, Moreno L, Antela A, Perez-Elias MJ, Dronza F, Marín A, Hernandez-Ranz F, Moreno A, Moreno S. Influence of liver fibrosis on highly active antiretroviral therapy-associated hepatotoxicity in patients with HIV and hepatitis C virus coinfection. *Clin Infect Dis* 2005;40:588-93.
215. Labarga P, Soriano V, Vispo ME, Pinilla J, Martín-Carbonero L, Castellares C, Casado R, Maida I, Garcia-Gasco P, Barreiro P. Hepatotoxicity of antiretroviral drugs is reduced after successful treatment of chronic hepatitis C in HIV-infected patients. *J Infect Dis* 2007;196:670-6.
216. Núñez M. Hepatotoxicity of antiretrovirals: incidence, mechanisms and management. *J Hepatol* 2006;44 (1 Suppl):S132-9.
217. McGovern BH, Ditelberg JS, Taylor LE, Gandhi RT, Christopoulos KA, Chapman S, Schwartzapfel B, Rindler E, Fiorino AM, Zaman MT, Sax PE, Graeme-Cook F, Hiberd PL. Hepatic steatosis is associated with fibrosis, nucleoside analogue use, and hepatitis C virus genotype 3 infection in HIV-seropositive patients. *Clin Infect Dis* 2006;43:365-72.
218. Kovari H, Ledergerber B, Peter U, Flepp M, Jost J, Schmid P, Calmy A, Mueller NJ, Muellhaupt B, Weber R; Swiss HIV Cohort Study. Association of noncirrhotic portal hypertension in HIV-infected persons and antiretroviral therapy with didanosine: a nested case-control study. *Clin Infect Dis* 2009;49:626-35.
219. Florida M, Giuliano M, Palmisano L, Vella S. Gender differences in the treatment of HIV infection. *Pharmacol Res* 2008;58:173-82.
220. Gandhi M, Aweeka F, Greenblatt RM, Blaschke TF. Sex differences in pharmacokinetics and pharmacodynam-

- ics. *Annu Rev Pharmacol Toxicol* 2004;44:499-523.
221. Ofotokun I, Chuck SK, Hitti JE. Antiretroviral pharmacokinetic profile: a review of sex differences. *Gend Med* 2007;4:106-19.
  222. Baylor MS, Johann-Liang R. Hepatotoxicity associated with nevirapine use. *J Acquir Immune Defic Syndr* 2004; 35:538-9.
  223. Dieterich DT, Robinson PA, Love J, Stern JO. Drug-induced liver injury associated with the use of nonnucleoside reverse-transcriptase inhibitors. *Clin Infect Dis* 2004;38 (Suppl 2):S80-9.
  224. Wit FW, Kesselring AM, Gras L, Richter C, van der Ende ME, Brinkman K, Lange JM, de Wolf F, Reiss P. Discontinuation of nevirapine because of hypersensitivity reactions in patients with prior treatment experience, compared with treatment-naive patients: the ATHENA cohort study. *Clin Infect Dis* 2008;46:933-40.
  225. Lactic Acidosis International Study Group. Risk factors for lactic acidosis and severe hyperlactataemia in HIV-1-infected adults exposed to antiretroviral therapy. *AIDS* 2007;21:2455-64.
  226. Brown TT, Qaqish RB. Response to Berg et al. 'Antiretroviral therapy and the prevalence of osteopenia and osteoporosis: a meta-analytic review'. *AIDS* 2007;21:1830-1.
  227. Yin M, Dobkin J, Brudney K, Becker C, Zadel JL, Manandhar M, Adesso V, Shane E. Bone mass and mineral metabolism in HIV+ postmenopausal women. *Osteoporos Int* 2005;16:1345-52.
  228. Transmission PoToH-IPWaPoP. Recommendations for Use of Antiretroviral Drugs in Pregnant HIV-1-Infected Women for Maternal Health and Interventions to Reduce Perinatal HIV Transmission in the United States. 2014.
  229. Leticee N, Viard JP, Yamgnane A, Karmochkine M, Benachi A. Contraceptive failure of etonogestrel implant in patients treated with antiretrovirals including efavirenz. *Contraception* 2012;85:425-7.
  230. Sevinsky H, Eley T, Persson A, Garner D, Yones C, Nettles R, Krantz K, Bertz R, Zhang J. The effect of efavirenz on the pharmacokinetics of an oral contraceptive containing ethinyl estradiol and norgestimate in healthy HIV-negative women. *Antivir Ther* 2011;16:149-56.
  231. Vogler MA, Patterson K, Kamemoto L, Park JG, Watts H, Aweeka F, Klingman KL, Cohn SE. Contraceptive efficacy of oral and transdermal hormones when co-administered with protease inhibitors in HIV-1-infected women: pharmacokinetic results of ACTG trial A5188. *J Acquir Immune Defic Syndr* 2010;55:473-82.
  232. Zhang J, Chung E, Yones C, Persson A, Mahnke L, Eley T, Xu X, Bertz R. The effect of atazanavir/ritonavir on the pharmacokinetics of an oral contraceptive containing ethinyl estradiol and norgestimate in healthy women. *Antivir Ther* 2011;16:157-64.
  233. Curtis KM, Nanda K, Kapp N. Safety of hormonal and intrauterine methods of contraception for women with HIV/AIDS: a systematic review. *AIDS* 2009;23 (Suppl 1):S55-67.
  234. Stringer EM, Kaseba C, Levy J, Sinkala M, Goldenberg RL, Chi BH, Matongo I, Vermund SH, Mwanahamuntu M, Stringer JS. A randomized trial of the intrauterine contraceptive device vs hormonal contraception in women who are infected with the human immunodeficiency virus. *Am J Obstet Gynecol* 2007;197:144.e1-8.
  235. Townsend CL, Cortina-Borja M, Peckham CS, de Ruiter A, Lyall H, Tookey PA. Low rates of mother-to-child transmission of HIV following effective pregnancy interventions in the United Kingdom and Ireland, 2000-2006. *AIDS* 2008;22:973-81.
  236. Tubiana R, Le Chenadec J, Rouzioux C, Mandelbrot L, Hamrene K, Dollfus C, Faye A, Delaugerre C, Blanche S, Warszawski J. Factors associated with mother-to-child transmission of HIV-1 despite a maternal viral load <500 copies/ml at delivery: a case-control study nested in the French perinatal cohort (EPF-ANRS CO1). *Clin Infect Dis* 2010;50:585-96.
  237. Floridia M, Ravizza M, Pinnetti C, Tibaldi C, Bucceri A, Anzidei G, Fiscon M, Molinari A, Martinelli P, Dalzero S, Tamburrini E; Italian Group on Surveillance on Antiretroviral Treatment in Pregnancy. Treatment change in pregnancy is a significant risk factor for detectable HIV-1 RNA in plasma at end of pregnancy. *HIV Clin Trials* 2010; 11:303-11.
  238. Briand N, Warszawski J, Mandelbrot L, Dollfus C, Pannier E, Cravello L, Nguyen R, Matheron I, Winer N, Tubiana R, Rouzioux C, Faye A, Blanche S; ANRS-EPF CO1-CO11 Study Group. Is intrapartum intravenous zidovudine for prevention of mother-to-child HIV-1 transmission still useful in the combination antiretroviral therapy era? *Clin Infect Dis* 2013;57:903-14.
  239. Anonymous. The mode of delivery and the risk of vertical transmission of human immunodeficiency virus type 1--a meta-analysis of 15 prospective cohort studies. The International Perinatal HIV Group. *N Engl J Med* 1999; 340:977-87.
  240. Mitchell C, Hitti J, Paul K, Agnew K, Cohn SE, Luque AE,

- Coombs R. Cervicovaginal shedding of HIV type 1 is related to genital tract inflammation independent of changes in vaginal microbiota. *AIDS Res Hum Retroviruses* 2011;27:35-9.
241. Committee on Pediatric AIDS. Infant feeding and transmission of human immunodeficiency virus in the United States. *Pediatrics* 2013;131:391-6.
242. Kearney M, Palmer S, Maldarelli F, Bixby C, Bazmi H, Rock D, Falloon J, Davey R, Dewar R, Metcalf J, Mellors J, Coffin J. Single-genome Sequencing Is More Sensitive than Standard Genotype Analysis for Detection of HIV-1 Drug-resistance Mutations. Abstract 695. 11th Conference on Retroviruses and Opportunistic Infections; 2004 February 8-11; San Francisco, California.
243. Hoffmann C, Minkah N, Leipzig J, Wang G, Arens MQ, Tebas P, Bushman FD. DNA bar coding and pyrosequencing to identify rare HIV drug resistance mutations. *Nucleic Acids Res* 2007;35:e91.
244. Paredes R, Marconi VC, Campbell TB, Kuritzkes DR. Systematic evaluation of allele-specific real-time PCR for the detection of minor HIV-1 variants with pol and env resistance mutations. *J Virol Methods* 2007;146:136-46.
245. Cai F, Chen H, Hicks CB, Bartlett JA, Zhu J, Gao F. Detection of minor drug-resistant populations by parallel allele-specific sequencing. *Nat Methods* 2007;4:123-5.
246. Castro H, Pillay D, Cane P, Asboe D, Cambiano V, Phillips A, Dunn DT; UK Collaborative Group on HIV Drug Resistance. Persistence of HIV-1 transmitted drug resistance mutations. *J Infect Dis* 2013;208:1459-63.
247. Kroodsma KL, Kozal MJ, Hamed KA, Winters MA, Merigan TC. Detection of drug resistance mutations in the human immunodeficiency virus type 1 (HIV-1) pol gene: differences in semen and blood HIV-1 RNA and proviral DNA. *J Infect Dis* 1994;170:1292-5.
248. Johnson VA, Calvez V, Gunthard HF, Paredes R, Pillay D, Shafer RW, Wensing AM, Richman DD. Update of the drug resistance mutations in HIV-1: March 2013. *Top Antivir Med* 2013;21:6-14.
249. Underwood M, Johns B, Sato A, Fujiwara T, Spreen W. S/GSK1349572: A Next Generation WEPEA098 Integrase Inhibitor with Activity Against Integrase Inhibitor-Resistant Clinical Isolates from Patients Experiencing Virologic Failure while on Raltegravir Therapy. Abstract WEPEA098. 5th IAS Conference on HIV Pathogenesis and Treatment and Prevention; 2009 July 19-22; Cape Town, South Africa.
250. Underwood MR, Johns BA, Sato A, Martin JN, Deeks SG, Fujiwara T. The activity of the integrase inhibitor dolutegravir against HIV-1 variants isolated from raltegravir-treated adults. *J Acquir Immune Defic Syndr* 2012;61:297-301.
251. Eron JJ, Clotet B, Durant J, Katlama C, Kumar P, Lazzarin A, Poizot-Martin I, Richmond G, Soriano V, Ait-Khaled M, Fujiwara T, Huang J, Min S, Vavro C, Yeo J; VIKING Study Group. Safety and efficacy of dolutegravir in treatment-experienced subjects with raltegravir-resistant HIV type 1 infection: 24-week results of the VIKING Study. *J Infect Dis* 2013;207:740-8.
252. Kobayashi M, Yoshinaga T, Seki T, Wakasa-Morimoto C, Brown KW, Ferris R, Foster SA, Hazen RJ, Miki S, Suyama-Kagitani A, Kawauchi-Miki S, Taishi T, Kawasuji T, Johns BA, Underwood MR, Garvey EP, Sato A, Fujiwara T. In Vitro antiretroviral properties of S/GSK1349572, a next-generation HIV integrase inhibitor. *Antimicrob Agents Chemother* 2011;55:813-21.
253. Eron J, Durant J, Poizot-Martin I, Reynes J, Soriano V, Kumar P, Richmond G, Vittecoq D, Fujiwara T, Ait-Khaled M, S Min S, Thomas D, Cuffe R, Yeo J. Activity of a next generation integrase inhibitor (INI), S/GSK1349572 in subjects with HIV exhibiting raltegravir resistance: initial results of VIKING study study (ING112961). Abstract MOAB0105. 18th International AIDS Conference; 2010 July 18-23; Vienna, Austria.
254. Goethals O, Vos A, Van Ginderen M, Geluykens P, Smits V, Schols D, Hertogs K, Clayton R. Primary mutations selected in vitro with raltegravir confer large fold changes in susceptibility to first-generation integrase inhibitors, but minor fold changes to inhibitors with second-generation resistance profiles. *Virology* 2010;402:338-46.
255. Lanier ER, Givens N, Stone C, Griffin P, Gibb D, Walker S, Tisdale M, Irlbeck D, Underwood M, St Clair M, Ait-Khaled M. Effect of concurrent zidovudine use on the resistance pathway selected by abacavir-containing regimens. *HIV Med* 2004;5:394-9.
256. Rhee SY, Taylor J, Wadhwa G, Ben-Hur A, Brutlag DL, Shafer RW. Genotypic predictors of human immunodeficiency virus type 1 drug resistance. *Proc Natl Acad Sci U S A* 2006;103:17355-60.
257. Larder BA. 3'-Azido-3'-deoxythymidine resistance suppressed by a mutation conferring human immunodeficiency virus type 1 resistance to nonnucleoside reverse transcriptase inhibitors. *Antimicrob Agents Chemother* 1992;36:2664-9.
258. Whitcomb JM, Huang W, Limoli K, Paxinos E, Wrin T,



- Skowron G, Deeks SG, Bates M, Hellmann NS, Petropoulos CJ. Hypersusceptibility to non-nucleoside reverse transcriptase inhibitors in HIV-1: clinical, phenotypic and genotypic correlates. *AIDS* 2002;16:F41-7.
259. Colonna R, Rose R, McLaren C, Thiry A, Parkin N, Friborg J. Identification of I50L as the signature atazanavir (ATV)-resistance mutation in treatment-naive HIV-1-infected patients receiving ATV-containing regimens. *J Infect Dis* 2004;189:1802-10.
260. Ziermann R, Limoli K, Das K, Arnold E, Petropoulos CJ, Parkin NT. A mutation in human immunodeficiency virus type 1 protease, N88S, that causes in vitro hypersensitivity to amprenavir. *J Virol* 2000;74:4414-9.
261. Wensing AM, Calvez V, Günthard HF, Johnson VA, Paredes R, Pillay D, Shafer RW, Richman DD. 2014 Update of the drug resistance mutations in HIV-1. *Top Antivir Med* 2014;22:642-50.
262. Arion D, Kaushik N, McCormick S, Borkow G, Parniak MA. Phenotypic mechanism of HIV-1 resistance to 3'-azido-3'-deoxythymidine (AZT): increased polymerization processivity and enhanced sensitivity to pyrophosphate of the mutant viral reverse transcriptase. *Biochemistry* 1998;37:15908-17.
263. Deval J, Selmi B, Boretto J, Egloff MP, Guerreiro C, Sarfati S, Canard B. The molecular mechanism of multidrug resistance by the Q151M human immunodeficiency virus type 1 reverse transcriptase and its suppression using alpha-boranophosphate nucleotide analogues. *J Biol Chem* 2002;277:42097-104.
264. Deval J, White KL, Miller MD, Parkin NT, Courcambek J, Halfon P, Selmi B, Boretto J, Canard B. Mechanistic basis for reduced viral and enzymatic fitness of HIV-1 reverse transcriptase containing both K65R and M184V mutations. *J Biol Chem* 2004;279:509-16.
265. Sharma PL, Crumpacker CS. Sharma PL1, Crumpacker CS. Decreased processivity of human immunodeficiency virus type 1 reverse transcriptase (RT) containing didanosine-selected mutation Leu74Val: a comparative analysis of RT variants Leu74Val and lamivudine-selected Met184Val. *J Virol* 1999;73:8448-56.
266. Cong ME, Heneine W, Garcia-Lerma JG. The fitness cost of mutations associated with human immunodeficiency virus type 1 drug resistance is modulated by mutational interactions. *J Virol* 2007;81:3037-41.
267. Cherrington JM, Mulato AS, Fuller MD, Chen MS. Novel mutation (K70E) in human immunodeficiency virus type 1 reverse transcriptase confers decreased susceptibility to 9-[2-(phosphonomethoxy)ethyl]adenine in vitro. *Antimicrob Agents Chemother* 1996;40:2212-6.
268. Kosalaraksa P, Kavlick MF, Maroun V, Le R, Mitsuya H. Comparative fitness of multi-dideoxynucleoside-resistant human immunodeficiency virus type 1 (HIV-1) in an In vitro competitive HIV-1 replication assay. *J Virol* 1999;73:5356-63.
269. Yoshimura K, Feldman R, Kodama E, Kavlick MF, Qiu YL, Zemlicka J, Mitsuya H. In vitro induction of human immunodeficiency virus type 1 variants resistant to phosphoralaninate prodrugs of Z-methylenecyclopropane nucleoside analogues. *Antimicrob Agents Chemother* 1999;43:2479-83.
270. Larder BA, Kemp SD, Harrigan PR. Potential mechanism for sustained antiretroviral efficacy of AZT-3TC combination therapy. *Science* 1995;269:696-9.
271. Parikh UM, Bachelier L, Koontz D, Mellors JW. The K65R mutation in human immunodeficiency virus type 1 reverse transcriptase exhibits bidirectional phenotypic antagonism with thymidine analog mutations. *J Virol* 2006;80:4971-7.
272. Parikh UM, Zelina S, Sluis-Cremer N, Mellors JW. Molecular mechanisms of bidirectional antagonism between K65R and thymidine analog mutations in HIV-1 reverse transcriptase. *AIDS* 2007;21:1405-14.
273. Whitcomb JM, Parkin NT, Chappey C, Hellmann NS, Petropoulos CJ. Broad nucleoside reverse-transcriptase inhibitor cross-resistance in human immunodeficiency virus type 1 clinical isolates. *J Infect Dis* 2003;188:992-1000.
274. Yahi N, Tamalet C, Tourrès C, Tivoli N, Ariasi F, Volot F, Gastaut JA, Gallais H, Moreau J, Fantini J. Mutation patterns of the reverse transcriptase and protease genes in human immunodeficiency virus type 1-infected patients undergoing combination therapy: survey of 787 sequences. *J Clin Microbiol* 1999;37:4099-106.
275. Gonzales MJ, Wu TD, Taylor J, Belitskaya I, Kantor R, Israelski D, Chou S, Zolopa AR, Fessel WJ, Shafer RW. Extended spectrum of HIV-1 reverse transcriptase mutations in patients receiving multiple nucleoside analog inhibitors. *AIDS* 2003;17:791-9.
276. Marcelin AG, Delaugerre C, Wirlden M, Viegas P, Simon A, Katlama C, Calvez V. Thymidine analogue reverse transcriptase inhibitors resistance mutations profiles and association to other nucleoside reverse transcriptase inhibitors resistance mutations observed in the context of virological failure. *J Med Virol* 2004;72:162-5.
277. Miller MD, Margot N, Lu B, Zhong L, Chen SS, Cheng A,

- Wulfsohn M. Genotypic and phenotypic predictors of the magnitude of response to tenofovir disoproxil fumarate treatment in antiretroviral-experienced patients. *J Infect Dis* 2004;189:837-46.
278. Cozzi-Lepri A, Ruiz L, Loveday C, Phillips AN, Clotet B, Reiss P, Ledergerber B, Holkmann C, Staszewski S, Lundgren JD; EuroSIDA Study Group. Thymidine analogue mutation profiles: factors associated with acquiring specific profiles and their impact on the virological response to therapy. *Antivir Ther* 2005;10:791-802.
279. Riva C, Violin M, Cozzi-Lepri A, Velleca R, Bertoli A, Viganò P, Minoli L, Orani A, Rizzardini G, Zauli T, Perno C, d'Arminio-Monforte A, Balotta C; the ICoNA Study Group. Transmitted virus with substitutions at position 215 and risk of virological failure in antiretroviral-naïve patients starting highly active antiretroviral therapy. Abstract 124. 11th International Drug Resistance Workshop; 2002 July 2-5; Seville, Spain.
280. Chappay C, Wrin T, Deeks S, Petropoulos C. Evolution of amino acid 215 in HIV-1 reverse transcriptase in response to intermittent drug selection. Abstract 32. 12th International Drug Resistance Workshop; 2003 June 10-14; Cabo del Sol, Los Cabos, Mexico.
281. Violin M, Cozzi-Lepri A, Velleca R, Vincenti A, D'Elia S, Chiodo F, Ghinelli F, Bertoli A, d'Arminio Monforte A, Perno CF, Moroni M, Balotta C. Risk of failure in patients with 215 HIV-1 revertants starting their first thymidine analog-containing highly active antiretroviral therapy. *AIDS* 2004;18:227-35.
282. Antinori A, Trotta MP, Lorenzini P, Torti C, Gianotti N, Maggiolo F, Ceccherini-Silberstein F, Nasto P, Castagna A, De Luca A, Mussini C, Andreoni M, Perno CF; GNOMO Study Group. Virological response to salvage therapy in HIV-infected persons carrying the reverse transcriptase K65R mutation. *Antivir Ther* 2007;12:1175-83.
283. Hawkins CA, Chaplin B, Idoko J, Ekong E, Adewole I, Gashau W, Murphy RL, Kanki P; APIN Plus/Harvard PEPFAR Team. Hawkins CA1, Chaplin B, Idoko J, Ekong E, Adewole I, Gashau W, Murphy RL, Kanki P; APIN Plus/Harvard PEPFAR Team. *J Acquir Immune Defic Syndr* 2009;52:228-34.
284. Wallis CL, Mellors JW, Venter WD, Sanne I, Stevens W. Varied patterns of HIV-1 drug resistance on failing first-line antiretroviral therapy in South Africa. *J Acquir Immune Defic Syndr* 2010;53:480-4.
285. Kozal MJ, Kroodsma K, Winters MA, Shafer RW, Efron B, Katzenstein DA, Merigan TC. Didanosine resistance in HIV-infected patients switched from zidovudine to didanosine monotherapy. *Ann Intern Med* 1994;121:263-8.
286. Shafer RW, Kozal MJ, Winters MA, Iversen AK, Katzenstein DA, Ragni MV, Meyer WA, 3rd, Gupta P, Rasheed S, Coombs R, Katzman M, Fiscus S, Merigan TC. Combination therapy with zidovudine and didanosine selects for drug-resistant human immunodeficiency virus type 1 strains with unique patterns of pol gene mutations. *J Infect Dis* 1994;169:722-9.
287. Harrigan PR, Stone C, Griffin P, Najera I, Bloor S, Kemp S, Tisdale M, Larder B. Resistance profile of the human immunodeficiency virus type 1 reverse transcriptase inhibitor abacavir (1592U89) after monotherapy and combination therapy. CNA2001 Investigative Group. *J Infect Dis* 2000;181:912-20.
288. Bachelier L, Jeffrey S, Hanna G, D'Aquila R, Wallace L, Logue K, Cordova B, Hertogs K, Larder B, Buckery R, Baker D, Gallagher K, Scarnati H, Tritch R, Rizzo C. Genotypic correlates of phenotypic resistance to efavirenz in virus isolates from patients failing nonnucleoside reverse transcriptase inhibitor therapy. *J Virol* 2001;75:4999-5008.
289. Vingerhoets J, Azijn H, Franssen E, De Baere I, Smeulders L, Jochmans D, Andries K, Pauwels R, de Béthune MP. TMC125 displays a high genetic barrier to the development of resistance: evidence from in vitro selection experiments. *J Virol* 2005;79:12773-82.
290. Rimsky L, Vingerhoets J, Van Eygen V, Eron J, Clotet B, Hoogstoel A, Boven K, Picchio G. Genotypic and phenotypic characterization of HIV-1 isolates obtained from patients on rilpivirine therapy experiencing virologic failure in the phase 3 ECHO and THRIVE studies: 48-week analysis. *J Acquir Immune Defic Syndr* 2012;59:39-46.
291. Vingerhoets J, Tambuyzer L, Azijn H, Hoogstoel A, Nijs S, Peeters M, de Béthune MP, De Smedt G, Woodfall B, Picchio G. Resistance profile of etravirine: combined analysis of baseline genotypic and phenotypic data from the randomized, controlled Phase III clinical studies. *AIDS* 2010;24:503-14.
292. Joly V, Descamps D, Peytavin G, Touati F, Mentre F, Duval X, Delarue S, Yeni P, Brun-Vezinet F. Evolution of human immunodeficiency virus type 1 (HIV-1) resistance mutations in nonnucleoside reverse transcriptase inhibitors (NNRTIs) in HIV-1-infected patients switched to antiretroviral therapy without NNRTIs. *Antimicrob Agents Chemother* 2004;48:172-5.

293. Collins JA, Thompson MG, Painsil E, Ricketts M, Gedzior J, Alexander L. Competitive fitness of nevirapine-resistant human immunodeficiency virus type 1 mutants. *J Virol* 2004;78:603-11.
294. Antinori A, Liuzzi G, Cingolani A, Bertoli A, Di Giambenedetto S, Trotta MP, Rizzo MG, Girardi E, De Luca A, Perno CF. Drug-resistant mutants of HIV-1 in patients exhibiting increasing CD4 cell count despite virological failure of highly active antiretroviral therapy. *AIDS* 2001;15:2325-7.
295. Huang W, Gamarnik A, Limoli K, Petropoulos CJ, Whitcomb JM. Amino acid substitutions at position 190 of human immunodeficiency virus type 1 reverse transcriptase increase susceptibility to delavirdine and impair virus replication. *J Virol* 2003;77:1512-23.
296. Marcelin AG, Flandre P, Descamps D, Morand-Joubert L, Charpentier C, Izopet J, Traub-Daatz MA, Saoudin H, De-laugerre C, Tamalet C, Cottalorda J, Bouvier-Alias M, Bettinger D, Dos Santos G, Ruffault A, Alloui C, Henquell C, Rogez S, Barin F, Signori-Schmuck A, Vallet S, Masquelier B, Calvez V; ANRS AC11 Resistance Study Group. Factors associated with virological response to etravirine in non-nucleoside reverse transcriptase inhibitor-experienced HIV-1-infected patients. *Antimicrob Agents Chemother* 2010;54:72-7.
297. Witvrouw M, Pannecouque C, Van Laethem K, Desmyter J, De Clercq E, Vandamme AM. Activity of non-nucleoside reverse transcriptase inhibitors against HIV-2 and SIV. *AIDS* 1999;13:1477-83.
298. Condra JH, Schleif WA, Blahy OM, Gabryelski LJ, Graham DJ, Quintero J, Rhodes A, Robbins HL, Roth E, Shivaprakash M, Titus D, Yang T, Teplert H, Squires KE, Deutsch PJ, Emini EA. In vivo emergence of HIV-1 variants resistant to multiple protease inhibitors. *Nature* 1995;374:569-71.
299. Kaplan AH, Michael SF, Wehbie RS, Knigge MF, Paul DA, Everitt L, Kempf DJ, Norbeck DW, Erickson JW, Swansstrom R. Selection of multiple human immunodeficiency virus type 1 variants that encode viral proteases with decreased sensitivity to an inhibitor of the viral protease. *Proc Natl Acad Sci U S A* 1994;91:5597-601.
300. Molla A, Korneyeva M, Gao Q, Vasavanonda S, Schipper PJ, Mo HM, Markowitz M, Chernyavskiy T, Niu P, Lyons N, Hsu A, Granneman GR, Ho DD, Boucher CA, Leonard JM, Norbeck DW, Kempf DJ. Ordered accumulation of mutations in HIV protease confers resistance to ritonavir. *Nat Med* 1996;2:760-6.
301. Mammano F, Trouplin V, Zennou V, Clavel F. Retracing the evolutionary pathways of human immunodeficiency virus type 1 resistance to protease inhibitors: virus fitness in the absence and in the presence of drug. *J Virol* 2000;74:8524-31.
302. Prado JG, Wrin T, Beauchaine J, Ruiz L, Petropoulos CJ, Frost SD, Clotet B, D'Aquila RT, Martinez-Picado J. Amprenavir-resistant HIV-1 exhibits lopinavir cross-resistance and reduced replication capacity. *AIDS* 2002;16:1009-17.
303. Nijhuis M, Schuurman R, de Jong D, Erickson J, Gustchina E, Albert J, Schipper P, Gulnik S, Boucher CA. Increased fitness of drug resistant HIV-1 protease as a result of acquisition of compensatory mutations during suboptimal therapy. *AIDS* 1999;13:2349-59.
304. Menzo S, Monchetti A, Balotta C, Corvasce S, Rusconi S, Paolucci S, Baldanti F, Bagnarelli P, Clementi M. Processivity and drug-dependence of HIV-1 protease: determinants of viral fitness in variants resistant to protease inhibitors. *AIDS* 2003;17:663-71.
305. Devereux HL, Emery VC, Johnson MA, Loveday C. Replicative fitness in vivo of HIV-1 variants with multiple drug resistance-associated mutations. *J Med Virol* 2001;65:218-24.
306. Maguire MF, Guinea R, Griffin P, Macmanus S, Elston RC, Wolfram J, Richards N, Hanlon MH, Porter DJ, Wrin T, Parkin N, Tisdale M, Furfine E, Petropoulos C, Snowden BW, Kleim JP. Changes in human immunodeficiency virus type 1 Gag at positions L449 and P453 are linked to I50V protease mutants in vivo and cause reduction of sensitivity to amprenavir and improved viral fitness in vitro. *J Virol* 2002;76:7398-406.
307. Lataillade M, Chiarella J, Kozal MJ. Natural polymorphism of the HIV-1 integrase gene and mutations associated with integrase inhibitor resistance. *Antivir Ther* 2007;12:563-70.
308. Low A, Prada N, Topper M, Vaida F, Castor D, Mohri H, Hazuda D, Muesing M, Markowitz M. Natural polymorphisms of human immunodeficiency virus type 1 integrase and inherent susceptibilities to a panel of integrase inhibitors. *Antimicrob Agents Chemother* 2009;53:4275-82.
309. Hazuda D, Miller M, Nguyen B, Zhao J, P005 Study Team. Resistance to the HIV-integrase inhibitor raltegravir: analysis of protocol 005, a phase II study in patients with triple-class resistant HIV-1 infection. Abstract 8. 16th International Drug Resistance Workshop; 2007 June 12-16;

- Barbados, West Indies.
310. Miller M, Danovich R, Ke Y, Witmer M, Zhao J, Havey C, Nguyen B, Hazuda D, P005 Study Team. Longitudinal analysis of resistance to the HIV-1 integrase inhibitor raltegravir: results from P005 a phase II study in treatment-experienced patients. Abstract 6. 17th International Drug Resistance Workshop; 2008 June 10-14; Sitges, Spain.
  311. Fransen S, Gupta S, Danovich R, Hazuda D, Miller M, Witmer M, Petropoulos CJ, Huang W. Loss of raltegravir susceptibility by human immunodeficiency virus type 1 is conferred via multiple nonoverlapping genetic pathways. *J Virol* 2009;83:11440-6.
  312. Hatano H, Lampiris H, Huang W, Hoh R, Grupta S, Fransen S, Martin J, Petropoulos C, Deek S. Virological and immunological outcomes in a cohort of patients failing integrase inhibitors. Abstract 10. 17th International Drug Resistance Workshop; 2008 June 10-14; Sitges, Spain.
  313. Da Silva D, Pellegrin I, Anies G, Breilh D, Wittkop L, Morlat P, Dupon M, Neau D, Pellegrin J, Fleury H, Masquelier B. Mutational patterns in the HIV-1 integrase related to virological failures on raltegravir containing regimens. Abstract 12. 17th International Drug Resistance Workshop; 2008 June 10-14; Sitges, Spain.
  314. Ceccherini-Silberstein F, Armenia D, D'Arrigo R, Micheli V, Fabeni L, Meraviglia P, Capetti A, Zaccarelli M, Trotta M, Narciso P, Antinori A, Perno C. Virological response and resistance in multi-experienced patients treated with raltegravir. Abstract 18. 17th International Drug Resistance Workshop; 2008 June 10-14; Sitges, Spain.
  315. Malet I, Delelis O, Valantin MA, Montes B, Soulie C, Wirten M, Tchertanov L, Peytavin G, Reynes J, Mouscadedet JF, Katlama C, Calvez V, Marcelin AG. Mutations associated with failure of raltegravir treatment affect integrase sensitivity to the inhibitor in vitro. *Antimicrob Agents Chemother* 2008;52:1351-8.
  316. Geretti A, Fearnhill E, Ceccherini-Silberstein F, Sönnernborg A, Soriano V, Masquelier B, Garcia F, Wensing A, Vandekerckhove L, Smit R, Clotet B, Marcelin A, the CORONET Study Group and in collaboration with CHAIN. Prevalence and patterns of raltegravir resistance in treated patients in Europe. Abstract 51. 19th International HIV and Hepatitis Virus Drug Resistance Workshop and Curative Strategies; 2010 June 8-12; Dubrovnik, Croatia.
  317. Abram M, Hluhanich R, Goodman D, Andreatta K, Margot N, Ye L, Cavanaugh J, Niedziela-Majka A, Barnes T, Novikov N, Chen X, Svarovskaia E, McColl D, White K, Miller M. Effect of Primary Elvitegravir Resistance Mutations in HIV-1 Integrase on Drug Susceptibility and Viral Replication Fitness. Abstract 3. 21st International Workshop on HIV & Hepatitis Virus Drug Resistance; 2013 June 5-9; Sitges, Spain.
  318. Abram ME, Hluhanich RM, Goodman DD, Andreatta KN, Margot NA, Ye L, Niedziela-Majka A, Barnes TL, Novikov N, Chen X, Svarovskaia ES, McColl DJ, White KL, Miller MD. Impact of primary elvitegravir resistance-associated mutations in HIV-1 integrase on drug susceptibility and viral replication fitness. *Antimicrob Agents Chemother* 2013;57:2654-63.
  319. White K, Kulkarni R, Szwarcberg J, Quirk E, Cheng A, Miles A. Integrated analysis of emergent drug resistance from the HIV-1 Phase 3 QUAD studies through week 48. Abstract 4. 21st International Workshop on HIV & Hepatitis Virus Drug Resistance; 2012 June 5-9; Sitges, Spain.
  320. Blanco JL, Varghese V, Rhee SY, Gatell JM, Shafer RW. HIV-1 integrase inhibitor resistance and its clinical implications. *J Infect Dis* 2011;203:1204-14.
  321. Seki T, Kobayashi M, Wakasa-Morimoto C, Yoshinaga T, Sato A, Fujiwara T, Underwood M, Garvey E, B J. S/GSK1349572 is a potent next generation HIV integrase inhibitor and demonstrates a superior resistance profile substantiated with 60 integrase mutant molecular clones. Abstract 555. 17th Conference on Retroviruses and Opportunistic Infections; 2010 February 16-19; San Francisco, California.
  322. Seki T, Kobayashi M, Wakasa-Morimoto C, Yoshinaga T, Sato A, Fujiwara T, Underwood MR, Garvey EP, Johns BA. S/GSK1349572 is a Potent Next Generation HIV Integrase Inhibitor and Demonstrates a Superior Resistance Profile Substantiated with 60 Integrase Mutant Molecular Clones. Abstract 555. 17th Conference on Retroviruses and Opportunistic Infections; 2010 February 16-19; San Francisco, California.
  323. Raffi F, Jaeger H, Quiros-Roldan E, Albrecht H, Belonosova E, Gatell JM, Baril JG, Domingo P, Brennan C, Almond S, Min S. Once-daily dolutegravir versus twice-daily raltegravir in antiretroviral-naive adults with HIV-1 infection (SPRING-2 study): 96 week results from a randomised, double-blind, non-inferiority trial. *Lancet Infect Dis* 2013;13:927-35.
  324. Raffi F, Rachlis A, Stellbrink HJ, Hardy WD, Torti C, Orkin C, Bloch M, Podzamczek D, Pokrovsky V, Pulido F, Almond S, Margolis D, Brennan C, Min S; SPRING-2 Study Group. Once-daily dolutegravir versus raltegravir in an-

- tiretroviral-naive adults with HIV-1 infection: 48 week results from the randomised, double-blind, non-inferiority SPRING-2 study. *Lancet* 2013;381:735-43.
325. Clotet B, Feinberg J, van Lunzen J, Khuong-Josses MA, Antinori A, Dumitru I, Pokrovskiy V, Fehr J, Ortiz R, Saag M, Harris J, Brennan C, Fujiwara T, Min S; ING114915 Study Team. Once-daily dolutegravir versus darunavir plus ritonavir in antiretroviral-naive adults with HIV-1 infection (FLAMINGO): 48 week results from the randomised open-label phase 3b study. *Lancet* 2014;383:2222-31.
326. Mesplède T, Wainberg MA. Is resistance to dolutegravir possible when this drug is used in first-line therapy? *Viruses* 2014;6:3377-85.
327. Hightower KE, Wang R, Deanda F, Johns BA, Weaver K, Shen Y, Tomberlin GH, Carter HL 3rd, Broderick T, Sigethy S, Seki T, Kobayashi M, Underwood MR. Dolutegravir (S/GSK1349572) exhibits significantly slower dissociation than raltegravir and elvitegravir from wild-type and integrase inhibitor-resistant HIV-1 integrase-DNA complexes. *Antimicrob Agents Chemother* 2011;55:4552-9.
328. Mesplède T, Quashie PK, Osman N, Han Y, Singhroy DN, Lie Y, Petropoulos CJ, Huang W, Wainberg MA. Viral fitness cost prevents HIV-1 from evading dolutegravir drug pressure. *Retrovirology* 2013;10:22.
329. Quashie PK, Mesplède T, Han YS, Oliveira M, Singhroy DN, Fujiwara T, Underwood MR, Wainberg MA. Characterization of the R263K mutation in HIV-1 integrase that confers low-level resistance to the second-generation integrase strand transfer inhibitor dolutegravir. *J Virol* 2012;86:2696-705.
330. Choe PG, Choi HJ, Kim NH, Park WB, Song KH, Bang JH, Kim ES, Park SW, Kim HB, Oh MD, Kim NJ. High prevalence of low bone mass and associated factors in Korean HIV-positive male patients undergoing antiretroviral therapy. *J Int AIDS Soc* 2014;17:18773.
331. Choe PG, Song JS, Cho JH, Kim SH, Park KH, Bang JH, Park WB, Kim HB, Kim DW, Kim TY, Heo DS, Oh MD, Kim NJ, Choe KW. Malignancies in patients with human immunodeficiency virus infection in South Korea. *Infect Chemother* 2006;38:367-73.
332. Ku NS, Lee Y, Ahn JY, Song JE, Kim MH, Kim SB, Jeong SJ, Hong KW, Kim E, Han SH, Song JY, Cheong HJ, Song YG, Kim WJ, Kim JM, Smith DM, Choi JY. HIV-associated neurocognitive disorder in HIV-infected Koreans: the Korean NeuroAIDS Project. *HIV Med* 2014;15:470-7.
